# Supplementary material for: Differences in aqueous humor protein profiles in patients with proliferative diabetic retinopathy before and after aflibercept treatment
Source: BMC Ophthalmol. 2024 Jan 22;24:32. doi: 10.1186/s12886-024-03292-1 (PMC10801989; doi:10.1186/s12886-024-03292-1)
Supplement: Supplementary file 2 — Supplementary Material 2: Table S1. The proteins quantified in aqueous humor samples of enrolled patients. Table S2. Differentially expressed proteins (DEPs) between two groups (|log2FC| > 0.58, unpaired two-sided t-test, p value < 0.05). Table S3. The enrichment analysis of GO biological processes for Differentially expressed proteins (DEPs) [file 12886_2024_3292_MOESM2_ESM.xlsx]

## Sheet: Table S1
Table S1. The proteins quantified in aqueous humor samples of enrolled patients.
	pre-group1	pre-group2	pre-group3	pre-group4	pre-group5	post-group1	post-group2	post-group3	post-group4	post-group5
A0A024QZX5	NA	NA	NA	NA	3016.92	NA	NA	NA	NA	3861.71
A0A024R0T9	10440	20479.8	35826.1	15165.7	35767.1	24823.5	2473.49	30598.6	26558.5	44620.2
A0A024R6I7	NA	5530.28	NA	NA	18755.9	NA	37410.1	NA	NA	18729.3
A0A075B6H7	7859.95	NA	NA	NA	NA	NA	NA	NA	NA	NA
A0A075B6I0	15259.3	96456.9	163977	2669.59	53569.1	9147.97	103334	173721	NA	49226
A0A075B6I9	11017.1	23235.7	35549	6924.1	28533.8	4132.69	14100.8	47740.1	5593.91	25831.4
A0A075B6J9	11910.8	15217.7	16575.2	42365.9	29463.8	7686.95	15704.6	9558.94	48700.9	28628.3
A0A075B6K4	86446.8	19984.6	19499.7	NA	NA	61448.7	85672.8	31166.7	2613.4	NA
A0A075B6K5	66736.8	110186	50632.5	234899	75483.3	66868	65754	93493.1	258303	71750.1
A0A075B6P5	14346.8	190978	243445	297468	57360.3	73031.7	61920.4	58962.5	354739	124738
A0A075B6R2	64992.9	36875.3	12896.4	5296.68	NA	38476.8	40311.3	21214.4	5443.44	2153.75
A0A075B6R9	NA	16431.6	36319.5	38559	8098.74	2925.51	NA	6387.24	37994.4	20249.8
A0A075B6S2	267737	873114	370802	516985	615922	250834	523259	601752	498666	456733
A0A075B6S5	NA	NA	6229.59	NA	3934.05	1367.83	NA	NA	NA	6958.9
A0A075B7B8	51385	37789.7	23864.1	31014.7	9248.15	43166.1	79255	59839.8	28518.4	12550.4
A0A075B7D0	609223	573812	486279	89063.1	41445.3	503987	473314	585193	90016.6	26502.5
A0A075B7D8	NA	NA	NA	NA	NA	2446.63	3222.26	NA	NA	2158.56
A0A087WSV8	NA	NA	NA	14416.1	1061.05	NA	NA	NA	13528.5	NA
A0A087WSY4	23096.2	35350.2	19011	18501.9	41248	10940.1	35734.4	23604.7	26115.5	30772.8
A0A087WSY5	17401.1	20727.4	31747.5	32016.1	16458.8	28254.6	20573.6	28560.9	28861.3	15962.4
A0A087WSY6	53635.2	145266	196493	182918	97297.4	100473	92166.4	103857	188617	93215.9
A0A087WTA8	16823.9	3335.49	2481.98	5305.48	8812.64	10254.9	4873.73	107114	3648.58	6085.21
A0A087WTY6	54651.5	74033.8	30642.3	79694.7	84780.9	111530	65832.7	39225.6	68986	48414.9
A0A087WUD8	42770.8	23120.4	17405.5	15620.9	27896.7	12059.9	5810.52	NA	6436.71	7187.29
A0A087WVQ9	NA	6416.04	NA	15601.3	5271.57	2993.71	NA	5594.42	NA	6165.59
A0A087WVR1	NA	NA	NA	NA	NA	7148.32	NA	NA	2200.17	NA
A0A087WWY3	NA	NA	NA	NA	NA	NA	NA	NA	NA	NA
A0A087WX77	17037.1	8016.11	8916.61	8222.28	6621	10454.9	12195.1	6414.16	5761.83	5540.38
A0A087WXI5	NA	3406.35	2118.5	4146.78	2174.58	1757.61	NA	1508.13	3458.04	1184.44
A0A087WXX2	NA	NA	NA	822.102	320.042	421.882	NA	NA	NA	619.401
A0A087WY35	NA	NA	NA	NA	NA	NA	NA	NA	NA	NA
A0A087WYG6	3201.24	NA	NA	NA	NA	8448.86	NA	NA	3192.14	NA
A0A087WYL5	NA	1729.96	NA	1676.46	NA	1141.58	NA	NA	1145.46	981.876
A0A087WZM2	9044.72	5006.16	2773.82	4337.96	3564.79	6660.2	NA	1803.26	3897.22	3518.38
A0A087X054	5012.72	5524.01	NA	6108.87	6387.03	3331.49	NA	7082.01	2509.78	4821.01
A0A087X0D5	9737.73	6946.3	2413.63	3117.49	4391.04	5531.35	1869.79	2356.75	NA	2237.42
A0A087X0I0	NA	2592.33	18776.7	2264.38	3234.87	2091.95	686.181	45870.5	2123.12	2241.57
A0A087X0K0	3697.64	NA	NA	NA	1493.2	4121.16	2434.71	NA	NA	1878.77
A0A087X0M8	12655.6	24892.2	18483.7	23243.5	19929.4	23376.9	12342.7	10583.6	25643.6	18592.2
A0A087X0S5	17103.8	26509.6	15208.6	23174.3	22437.9	29836.9	16046.4	9676.87	25755.1	18591.3
A0A087X0T8	11674.7	11546	NA	6374.94	15377.1	11748.3	12564.5	7922.42	3617.11	5589.96
A0A087X191	NA	NA	837.37	464.586	NA	952.816	NA	NA	NA	NA
A0A087X1J7	435357	338313	192428	506723	345397	409815	379860	294780	452460	269281
A0A087X1L8	NA	9411.74	10370.5	12074.3	9405.53	9386.92	NA	3626.72	NA	11316.5
A0A087X208	20730.3	7173.16	5805.21	6779.24	8655.69	10807.2	4977.93	4436.1	10083.9	4704.25
A0A087X232	102095	102955	101783	85834.4	150033	102870	90495.8	82522.4	110791	120962
A0A087X2B5	NA	NA	NA	NA	NA	2731.24	NA	NA	2888.99	1578.15
A0A096LPE2	26324.7	20767.6	73735.5	14052.1	17380.1	10376.6	19168.1	40882.8	17916.9	17532.7
A0A0A0MQY7	1854.64	NA	NA	NA	2556.79	2442.7	NA	13323	NA	NA
A0A0A0MR55	NA	NA	NA	NA	NA	1384.43	NA	NA	NA	NA
A0A0A0MRJ6	NA	NA	6552.63	NA	2245.37	NA	NA	NA	NA	2193.52
A0A0A0MRJ7	29812.8	20751.9	21626.8	29858.2	13873.1	26494.3	16291.6	12395.1	36304.5	16875.4
A0A0A0MRZ8	1.63144e+06	1366632	1.98992e+06	1.55853e+06	1.02745e+06	895515	1580983	1.79891e+06	1.58581e+06	1.019e+06
A0A0A0MS08	100833176	44843780	46544444	66465148	34176280	16022949	26814632	25075796	35438500	14330366
A0A0A0MS09	33536.9	NA	11471.6	NA	4319.32	9497.29	1987.64	13453.2	9795.92	NA
A0A0A0MS15	5720.54	50486.5	50009.6	19201.4	34581	12433.1	44035	33115.2	13813.6	37236.7
A0A0A0MSA7	19537.5	36768	35284.1	42987.4	22143.1	38898.4	17822.4	25772.1	49634	16576.4
A0A0A0MSA9	2295.31	7465.7	7056.07	8611.18	3975.54	5866.29	4248.37	3016.34	6532.49	3469.97
A0A0A0MSQ0	5631.31	7721.35	5283.79	13000.4	12615.1	6839.57	7497.04	11000.1	15383	13880.1
A0A0A0MSV6	32248.3	20463.5	6251.61	4792.17	21388.3	18379.3	18084.5	18238.4	8380.01	18224.3
A0A0A0MSX3	NA	NA	NA	NA	NA	NA	NA	NA	NA	NA
A0A0A0MSY7	199353	19261	NA	NA	NA	12005.9	45875.6	37038.8	NA	NA
A0A0A0MT36	7746.16	9396.03	13166	14546.7	3072.56	13422.5	4814.17	11437.5	10757.9	3682.94
A0A0A0MT69	7838.04	NA	NA	NA	NA	5746.55	8775.22	7511.68	NA	NA
A0A0A0MT71	NA	976.77	NA	NA	NA	1419.42	1275.95	974.886	NA	NA
A0A0A0MT89	NA	21060.9	26075.4	16499.8	12898.5	7329.89	21562.4	33436.1	24295.6	12777
A0A0A0MTH0	4471.95	NA	NA	NA	159672	NA	NA	NA	NA	NA
A0A0A0MTI5	NA	NA	NA	NA	1947.55	NA	NA	NA	NA	NA
A0A0A0MTS2	2534.26	NA	NA	1029.19	2678.9	834.346	NA	NA	NA	2105.89
A0A0B4J1U7	98688.5	214987	210754	232298	177808	78709.1	199215	226893	214531	169503
A0A0B4J1V0	6359.07	14101.8	7270.49	7264.65	13723.7	7201.69	16764.6	9711.98	9720.87	13800.6
A0A0B4J1V2	NA	55829.9	39056.8	44808.7	31055.8	5551.11	41278.5	43804.5	39915.8	34142.8
A0A0B4J1V6	NA	8600.57	6436.84	4108.48	10277.5	3979.22	11791.2	9702.25	3397.36	6144.02
A0A0B4J1X5	741542	1.2143e+06	819968	1.12771e+06	464708	585769	1.14993e+06	794326	1.23644e+06	502490
A0A0B4J1Y8	9610.81	22208.2	26398.2	9522.45	27861.1	7408.84	25801.4	22140.4	7458.38	31243.3
A0A0B4J1Y9	271082	392242	507160	641662	338867	149941	506168	454047	538441	344017
A0A0B4J231	1496587	2.50701e+06	1.8017e+06	2.04783e+06	1.78091e+06	1214981	1.85636e+06	2.64035e+06	2.55502e+06	1.59003e+06
A0A0B4J2B5	818626	2.15824e+06	1.63976e+06	1567953	1.26836e+06	633361	1.25427e+06	2.64049e+06	2316160	956121
A0A0C4DFP6	37744.2	52958.5	67747.8	95118.3	51855.2	53601.3	55057.2	42396.7	107508	48120.9
A0A0C4DFP8	NA	NA	NA	NA	1182.33	NA	NA	NA	NA	NA
A0A0C4DFZ2	NA	NA	NA	NA	NA	NA	NA	NA	NA	NA
A0A0C4DGB2	NA	NA	NA	NA	5681.13	NA	NA	NA	NA	2168.75
A0A0C4DGC1	6947.89	1415.52	NA	NA	2313.25	2405.35	NA	NA	NA	2993.18
A0A0C4DGL1	1993.61	NA	3297.42	1875.62	1314.28	916.665	NA	NA	900.374	1175.63
A0A0C4DGN2	NA	3050.84	9078.4	8003.57	4717.79	NA	NA	3974.23	6218.07	4810.3
A0A0C4DGV8	9014.73	16297	15259.9	15686	8617.03	NA	914.331	NA	18897.8	4111.77
A0A0C4DH24	NA	21617	11159.6	34380.7	25876.3	NA	15344.1	6397.54	54592.9	23648.1
A0A0C4DH25	440563	529015	855789	461682	387335	279852	583419	891627	524312	358967
A0A0C4DH29	NA	1570.54	NA	11894.4	4871.32	1509.16	NA	NA	9612.82	5254.87
A0A0C4DH34	93292.5	106012	4087.42	27986.5	9042.57	23958.3	69851.9	98804.3	4704.82	8261.32
A0A0C4DH35	16360	10369.9	9709.92	11828.2	9902.61	16396.9	39939.9	23176.8	15978.1	12970.9
A0A0C4DH36	9668.45	5827.48	5786.83	19623.1	1273.91	6796.58	24548.2	10376.7	6301.9	5075.81
A0A0C4DH38	14586.6	15235.8	10524.2	13596.7	14284.1	18480.5	18148.3	16484.5	15409.7	15199.1
A0A0C4DH41	58017.4	62010.9	16322.2	23409.6	52724.8	47848.1	68207	43194.8	37658.5	38587.1
A0A0C4DH43	338154	401482	397211	9033.47	223718	334077	296864	412977	20610	193868
A0A0C4DH72	NA	3870.61	9556.99	1685.51	2409.22	3575.76	9450.27	NA	738.022	2753.5
A0A0D9SES4	NA	NA	NA	NA	NA	NA	NA	NA	NA	NA
A0A0G2JIW1	NA	NA	NA	NA	2654.88	2526.1	NA	NA	NA	NA
A0A0G2JRQ6	73931.8	63852.8	82064.7	102150	62124.1	48682.4	76395.2	54838.1	109175	61846.2
A0A0G2JS06	2795.75	13748.7	9609.42	NA	15277.1	4358.04	NA	NA	7732.85	18334.6
A0A0J9YW62	NA	3681.78	NA	2277.55	NA	NA	NA	NA	NA	NA
A0A0J9YY99	132498	173803	47510.4	70276	101478	98326	191478	61326.5	105716	96740.9
A0A0S2Z4L3	44777.2	87777.6	72445.4	59295.1	62194.3	68267.5	47361.8	41334	79575.6	70798.2
A0A0U1RQC5	3488.41	6071.85	3575.53	6069.63	4945.34	3599.64	NA	NA	5638.44	5071.74
A0A0U1RR20	9051.34	5721.26	4260.96	3253.96	8971.41	2318.63	19435.7	4120.98	3540.54	4788.77
A0A140T912	26229.2	12528.9	NA	4067.76	7756.99	23536.4	12841.2	NA	2647.28	5344.76
A0A1B0GTL7	NA	NA	NA	NA	NA	NA	NA	NA	NA	NA
A0A1B0GTM3	8303.05	5421.79	9024.82	7721.84	5193.25	4639.56	5077.62	3456.27	6053.23	3701.23
A0A1B0GUU9	62903.9	221106	38181.2	58200.1	570927	96243.2	111728	36750.8	52779.6	563214
A0A1B0GV23	1.09553e+06	1.16518e+06	549603	658014	545626	685135	675305	391096	588336	451798
A0A1B0GV53	25495.4	9136.27	14360.2	17907.1	13251.6	18261.6	NA	10633.9	20060.4	11200
A0A1B0GVB9	24348.2	19403.4	16105.4	9897.74	21362.3	4119.06	1955.77	7956.83	11417	15941.8
A0A1C7CYX9	NA	996.496	NA	NA	203.681	279.553	NA	NA	NA	607.665
A0A1W2PNW4	7.2663e+06	4470735	5815015	6.74654e+06	3828426	NA	85267.7	NA	NA	75828.4
A0A1W2PQB1	NA	3794.24	7209.42	4882.69	3553.59	3596.22	1662.55	3179.89	4436.82	5301.62
A0A286YES1	63448.9	99809	154434	59113.9	125814	58594.8	159035	264364	78786.1	87093.6
A0A286YEY1	1.48216e+06	3.31913e+06	2.31467e+06	2.18379e+06	1.80316e+06	1193805	3.14273e+06	2.38196e+06	2.96099e+06	2.38795e+06
A0A286YEY4	4.7657e+06	9135566	13706432	11909718	4337360	3.21788e+06	12616774	15288022	15485113	6.16048e+06
A0A286YEY5	692066	2.10036e+06	2603187	1.98512e+06	1.462e+06	928499	1.55673e+06	1750870	1.79135e+06	1.55706e+06
A0A286YFF7	25220.3	9890.17	11175.7	8838.69	8921.52	8195.19	13783.6	8231.31	12590	5578.89
A0A286YFJ8	106952	226122	223131	224089	100837	103320	204436	285937	213425	89457
A0A2Q2TTZ9	173655	279823	181466	218068	173313	141116	342529	275425	195864	139244
A0A2R8Y3M9	190919	164630	250079	212619	162763	256652	203470	210659	230363	202558
A0A2R8Y3T0	19509.1	9556.92	9883.54	15403.2	7568.76	7411.69	10905.8	9861.9	18032.5	8073.54
A0A2R8Y420	NA	NA	NA	NA	812.214	NA	NA	NA	NA	NA
A0A2R8Y430	4356.04	1700.09	NA	2482.99	5832.62	NA	NA	1746.42	2682.62	3985.09
A0A2R8Y7U1	14475.1	18439.7	18768.7	19220.3	13479.2	18135.1	4520.6	12020.7	17776.1	8104.77
A0A2R8Y7X9	26107.7	3993.15	NA	5006.46	69809.7	4540.35	NA	NA	3845.38	29181.3
A0A2R8YEC9	3912.17	6192.71	8558.16	4768.95	3667.73	3558.01	NA	NA	7126.18	2874.18
A0A2U3TZL5	22239.9	41714.8	47876.4	55920.2	3301.17	21405.2	23389.4	18667.7	27998.6	4202.75
A0A2U3U034	3533.43	NA	NA	NA	NA	NA	NA	829.075	2054.57	NA
A0A3B3IQ51	NA	NA	NA	4493.53	921.688	4061.15	5360.67	NA	6235.21	3343.83
A0A3B3IRN5	213433	555883	776872	12843.9	9164.05	49443.6	1.82669e+06	4691.93	10957.7	15690.1
A0A3B3ISD1	NA	NA	NA	NA	NA	NA	NA	NA	NA	NA
A0A3B3ISR2	30788.8	20364.6	8906.55	6141.2	19376.5	49495.2	16918.5	9819.8	16630	31098.3
A0A3B3ISS6	37257.9	38952.2	31379.9	25294.6	44253.6	29624.7	31302.4	19437.2	35962.1	32792.1
A0A3B3IT96	NA	13937.7	4604.59	4953.57	7896.6	7035.77	6451.39	NA	4481.57	6605.95
A0A3B3ITY6	29662.3	10100.3	17986.1	26069.5	10621.1	67341.2	15612.9	14929.9	33902.2	13493.3
A0A3B3IUC0	NA	NA	NA	NA	NA	1591.38	NA	NA	NA	NA
A0A3B3IUD5	34148.3	24484.8	11968.2	23802.9	16853	15812.3	19225.2	7153.59	28365.9	16737.4
A0A3B3IUE0	14570.8	17519	44772.9	37324.5	27976.8	45379.6	27852	23024.4	27765.8	25022.3
A0AVL1	NA	NA	NA	NA	1610.2	3813.99	NA	NA	NA	781.788
A0M8Q6	24684.1	NA	NA	NA	NA	NA	NA	NA	NA	NA
A1L4H1	1313.38	NA	NA	NA	NA	NA	NA	NA	NA	NA
A2A2V1	NA	NA	NA	NA	NA	4603.17	NA	NA	NA	2236.73
A2A3C1	NA	4633.01	NA	4312.46	2728.28	5343.4	NA	NA	5233.56	3362.69
A6NEC2	NA	NA	NA	NA	NA	NA	NA	NA	NA	NA
A6NGN9	NA	9271.69	NA	NA	2543.08	NA	NA	NA	NA	537.187
A6NJA2	NA	NA	NA	NA	2098.34	NA	NA	NA	NA	NA
A8MVZ9	6842.9	5888.9	4359.41	5604.38	7377.07	7509.34	3858.12	2121.74	4824.77	3568.15
A8MXB9	NA	NA	NA	NA	398.737	NA	834.545	335.133	NA	NA
B0QYF8	NA	NA	NA	NA	NA	NA	NA	NA	NA	NA
B0QYH4	NA	5631.72	NA	6653.02	NA	3537.62	NA	NA	4698.84	2747.36
B0YIW2	35299.2	62838.5	76414.7	46658.7	81631.7	71582.9	16333.9	78769.6	84269.6	121577
B0YJC4	9125.36	5754.4	1254.8	NA	11125.9	2194.19	1247.07	1131.34	NA	9544.47
B1AHL2	14346.1	14587.8	10441.4	5852.37	NA	17746.9	7703.82	4149.5	10365.8	NA
B1AK87	NA	NA	NA	NA	3216.15	NA	NA	NA	NA	2313.21
B1AKZ9	NA	NA	NA	NA	NA	NA	NA	NA	NA	NA
B1ALD9	NA	NA	NA	NA	NA	1958.95	NA	NA	NA	NA
B1AP13	NA	NA	NA	NA	NA	1397.38	NA	NA	NA	NA
B1B1J6	NA	NA	NA	NA	NA	NA	NA	NA	NA	NA
B4DV12	14255.7	4804.89	NA	5853.48	27981.3	5221.05	8380.12	3990.73	4122.43	9442.29
B4E1Z4	759080	484068	762720	497321	470353	351706	601266	1.09943e+06	642398	393266
B5MBX2	NA	NA	NA	NA	NA	NA	NA	NA	NA	NA
B5MDF5	2326.99	NA	NA	NA	8250.92	NA	NA	NA	NA	7659.72
B7WNR0	16385.4	76963.5	103039	118701	91702	64813.3	33647.6	76166.9	140440	66351.9
B7Z4G8	19314.2	28235	30081.4	29455.1	16047.8	23383.1	16840.1	15803.9	27435.9	19180.2
B7Z6Z4	NA	NA	NA	NA	2925.43	NA	NA	NA	NA	2637.56
B7ZKR5	NA	NA	NA	NA	2444.19	1477.31	NA	NA	NA	2086.53
B8ZZ51	10850.9	NA	1888.56	NA	21723.6	7552.47	NA	NA	3394.31	18617.3
C9IZ46	43263.2	NA	14503.1	76371.3	41016.3	28408.5	27718.9	26341.8	68933.7	21694.1
C9IZG4	NA	16524.4	9677.4	33592.2	26563.3	18242.8	NA	1521.94	24877.5	28899.2
C9J080	NA	NA	NA	NA	NA	NA	NA	NA	NA	NA
C9J0K6	NA	NA	NA	NA	4835.73	NA	NA	NA	NA	3643.71
C9J2H1	70341.8	30917.3	37622	52613.3	28831.1	45583.1	29052.2	27688.8	64508.9	24231
C9J4D3	NA	NA	NA	NA	1298.94	718.376	NA	NA	188.625	356.387
C9J6G4	NA	14327.6	14405	14471.3	9184.7	10896.3	10641.5	NA	16515.1	8028.87
C9J6H2	NA	NA	NA	NA	NA	1747.37	NA	NA	NA	NA
C9J8S2	38347.3	19788.4	22966.1	33382.3	20658.3	27548.2	15752.6	24891.8	40935.1	13934.9
C9J8Z4	NA	NA	NA	NA	NA	NA	NA	NA	NA	NA
C9JB90	NA	NA	NA	39622.2	43019.6	29681.7	NA	NA	23008.3	60025.8
C9JC84	33117.4	134000	128271	70854.7	112665	40426.5	48401.6	117713	61835.4	121298
C9JF17	669096	789191	373957	357946	448730	369712	544994	378822	333022	233266
C9JGG1	NA	NA	NA	1221.23	1633.59	1377.5	NA	NA	1797.42	NA
C9JHR8	81187	23514.5	123070	63407.1	1723.55	4560.28	NA	109171	3257.75	2627.64
C9JIF9	NA	2511.72	NA	NA	NA	2042.91	NA	NA	NA	2306.82
C9JIZ6	74950.6	54653.7	41444.6	59170.4	58376	101379	25117.7	43336.3	65983.3	36769.3
C9JL85	NA	NA	NA	NA	12700.1	1293.38	NA	NA	NA	8659.14
C9JPG5	6402.29	NA	NA	NA	2542.75	3051.82	NA	NA	NA	NA
C9JPQ9	5564.03	NA	NA	NA	NA	NA	1812.31	4160.41	NA	1216.55
C9JUW7	NA	NA	NA	NA	NA	NA	NA	1784.92	NA	285.379
C9JV77	290760	801300	1.08025e+06	1.08084e+06	723183	613140	584742	925554	1340939	768232
C9JWQ3	NA	NA	NA	753.807	NA	350.654	NA	NA	2567.02	NA
C9JXI5	67661.7	45712.6	28425.1	54267.6	44168.5	105686	117408	147392	58265.4	37339.9
C9JYJ0	NA	NA	NA	NA	NA	NA	NA	NA	NA	NA
C9JYY6	15670.9	13560.2	11436.7	15337.4	11810.6	9206.59	10783.7	8032.42	12355.6	10629.8
C9JZ52	NA	NA	NA	NA	NA	6717.73	3789.09	NA	NA	NA
D3YTG3	26611.5	10131.3	12682.3	17199.4	9434.1	12166.7	11440.6	16452.2	24277.5	8092.76
D3YTI2	NA	NA	NA	NA	NA	NA	NA	NA	NA	NA
D6RA26	21678.5	NA	73696.3	42754.8	1655.7	27985.8	52414.2	NA	68683.6	16656
D6RAR4	NA	NA	NA	2155.26	NA	1515.7	NA	NA	NA	850.916
D6RBV2	21553.6	13801.2	18589.3	16699.9	14379	19771.8	20725.3	8072.28	16344.1	9498.94
D6RC06	NA	NA	NA	NA	1949.13	NA	NA	NA	NA	2766.94
D6RD17	22854.8	76243.2	7643.63	24797.5	136849	11336.4	49857.2	10644.7	19741.7	59005.6
D6RD58	NA	NA	NA	36763.7	7954.1	14437.5	NA	6815.54	43602	4879.09
D6RD66	NA	NA	NA	NA	4048.41	NA	NA	NA	NA	NA
D6RE82	2.32312e+06	21156.4	20809.7	7563.44	3910.82	139501	1.63049e+06	87689.3	9746.09	3818.78
D6RE83	NA	NA	NA	NA	NA	NA	NA	NA	4455.96	NA
D6RF35	607436	1.385e+06	2594144	2.43058e+06	880902	1.06221e+06	1.15489e+06	1.89845e+06	2.97593e+06	1.15164e+06
D6RF86	NA	NA	NA	NA	4382.88	3500.81	NA	NA	NA	2653.55
D6RGG3	NA	NA	NA	NA	NA	NA	NA	NA	NA	NA
E5RFK4	NA	NA	NA	NA	NA	NA	NA	NA	NA	NA
E5RFS4	NA	NA	NA	NA	2420.37	NA	NA	NA	NA	NA
E5RHG6	NA	NA	NA	NA	3407.11	NA	NA	NA	NA	3687.98
E7EMB3	3279.1	2417.77	NA	NA	9429.38	1407.42	4017.45	NA	NA	2361.22
E7EMS2	73939.7	21797.1	15096.5	21072.6	16674.8	70046.3	40604.1	21811.4	25186.1	17498.8
E7END6	NA	6318.47	7219.48	5758.68	7108.45	4880.23	NA	4004.21	5055.1	8867.81
E7EPV7	NA	NA	NA	NA	4383.99	NA	NA	NA	NA	3220.82
E7EQB2	12242.2	6766.52	NA	4917.75	62954.6	3887.05	7839.5	NA	5148.24	57182.2
E7EQR8	NA	NA	NA	22460.4	NA	5199.72	NA	NA	16301.7	NA
E7ERL0	NA	NA	NA	NA	10636.2	1384.04	NA	NA	NA	6569.05
E7ES19	23938.6	13713.9	40204.5	29382.3	13454.9	8502.7	29332	32280.9	34416	16062.4
E7ESB3	NA	978.714	1935.33	NA	NA	222.793	NA	NA	1091.55	1624.95
E7EU04	NA	NA	NA	NA	715.873	975.957	NA	NA	NA	NA
E7EUF1	375149	175900	189021	252524	123047	246422	232514	167733	285592	131131
E7EX29	15518.2	14803.7	3937.52	9031.84	36323.9	20780.3	15818	6580.51	19034.6	27383.3
E7EX60	NA	NA	NA	NA	3130	4514.47	NA	NA	NA	NA
E9PC84	2442.32	NA	NA	NA	1942.9	NA	NA	NA	NA	3322.66
E9PCD7	NA	NA	NA	NA	NA	NA	NA	NA	NA	NA
E9PEK4	4290.89	8973.72	9222.85	8639.53	7571.85	6531.31	6247.84	2817.54	9511.44	8759.57
E9PF17	22108.9	11967.6	NA	14803.9	4987.99	5611.89	NA	5587.3	19696.1	4918.5
E9PG40	13760.4	17886.8	27136.7	23423.6	21148.7	14642.4	34286.1	13047.9	24247.5	13657.9
E9PGC5	703.828	NA	NA	NA	318.83	798.79	NA	NA	5625.87	2111.62
E9PGN7	338196	376091	180777	236201	354867	210906	317501	294490	210427	221427
E9PHK0	30408.6	19402	14322.2	22107.6	47858.2	41517.6	32106.7	34783	28775.2	37271.2
E9PIF4	4519.87	6156.69	1028.04	15949.8	6737.65	4320.45	NA	NA	7148.45	8673.66
E9PIK5	NA	NA	NA	NA	3350.81	1976.81	NA	NA	NA	1818.27
E9PK25	7899.36	5458.39	NA	3552.15	9206.64	5974.02	NA	NA	2380.88	6357.61
E9PK47	NA	NA	NA	NA	NA	NA	NA	NA	NA	NA
E9PKC6	43975.2	11215.2	6264.84	8508.83	8813.6	11763.1	NA	NA	11610.9	6379.51
E9PKE3	3671.51	3798.87	1062.75	2618.27	9752.49	3808.23	NA	2935.7	1690.36	9269.78
E9PKL9	NA	NA	NA	NA	2815.37	NA	NA	NA	NA	3038.48
E9PL83	NA	NA	NA	NA	NA	NA	NA	NA	NA	NA
E9PN95	NA	7906.4	11124.6	15449.7	4161.31	9222.5	NA	6470.88	19848.2	3454.84
E9PPZ9	8668.87	13781.9	13734.7	13082.9	36847.4	10715.1	20630.5	11978.1	22987.3	8252.47
E9PRU1	27952.4	17746.1	26376.3	17800.8	22235.8	20634.6	13577.7	12134.1	30629.6	18448.9
F5GWQ8	NA	2457.6	NA	NA	NA	1333.99	NA	2238.16	NA	1521.92
F5GXJ9	NA	NA	NA	NA	1967.3	3642.25	NA	NA	3358.2	NA
F5GY80	8599.9	9286.69	11854.6	5991.24	11398.3	6902.02	5460.39	8610.93	6905.04	9712.46
F5GZI0	NA	NA	NA	NA	1247.91	1350.69	2813.25	NA	NA	NA
F5H1S8	NA	NA	NA	NA	NA	1363.56	NA	NA	NA	453.236
F5H283	18952.7	12043.1	17183.2	11253.6	6683.95	13692.8	25948.1	13176.6	14011.7	7947.32
F5H2R5	NA	3503.77	NA	NA	2602.23	2405.74	NA	NA	NA	1757.19
F5H5D3	NA	NA	NA	NA	2687.46	593.767	NA	NA	NA	1707.48
F5H6X6	NA	NA	NA	NA	NA	NA	NA	NA	NA	NA
F6S8M0	20836.5	23515	22359.4	31193.5	15474.8	23412.5	16206.7	8700.72	29055.4	9761.23
F6SYF8	100671	2082.21	24426.9	35865.9	17739.7	29485.6	19238.2	54815.2	15820.3	11233.4
F6VDH7	6182.29	3234.9	4702.28	5218.78	4422.77	5502.3	NA	2413.52	5234.48	5385.02
F6WFR7	NA	10067.2	NA	8929.83	NA	7917.67	NA	NA	14963.7	NA
F8VSD4	30755.1	NA	NA	NA	41988	NA	NA	NA	NA	21604.9
F8VVB6	10151.3	8919.79	18785.5	19264	15870.1	17344.8	12825.4	10513.9	26402.6	20049.7
F8VXH8	NA	NA	NA	NA	NA	902.264	NA	NA	NA	NA
F8W1S1	71924	NA	22523.4	NA	NA	NA	NA	NA	NA	NA
F8W785	NA	2412.61	NA	4579.05	3048.01	4227.59	NA	NA	4084.62	NA
F8W8W4	6821.58	2617.26	1473.92	733.226	320.79	2933.95	NA	7458.1	3365.33	441.874
F8WF14	4531.06	12004.6	10953.5	9207.22	6506.26	6348.19	NA	5017.27	15408.7	8545.04
G3V164	NA	NA	NA	971.452	759.018	NA	NA	NA	NA	915.739
G3V192	NA	NA	NA	NA	3157.28	NA	NA	NA	NA	1754.81
G3V1C5	NA	24879.9	NA	NA	4672.96	12311.2	NA	NA	4483.01	6261.91
G3V2F7	NA	NA	NA	NA	12556.7	24633.8	NA	NA	NA	8799.45
G3V2W1	NA	5335.27	5985.59	NA	6165.2	2493.73	NA	7933.94	5072.59	4445.74
G3V3X5	219170	96602.3	76450.6	141717	126798	133822	96696.9	78717.1	134270	132529
G3V4P8	NA	NA	NA	NA	3977.52	NA	NA	NA	NA	3585.56
G3V4U0	9781.57	7247.27	NA	9653.89	12302	11171.3	6522.14	6906.72	NA	7298.07
G3XAK1	8871.06	5060.31	7365.2	4320.82	6136.7	4354.76	6953.48	8835.61	4057.96	5184.57
G5E9G7	NA	4646.25	3066.67	5045.16	3302.36	NA	NA	NA	NA	NA
H0Y6T7	NA	1613.34	548.186	NA	4401.29	1749.29	NA	NA	2338.32	2554.86
H0Y9C7	2559.48	9850.79	7656.57	5357.51	8135.92	6928.48	5697.18	4186.93	3167.47	8650.65
H0YAB0	NA	NA	NA	NA	NA	NA	NA	NA	NA	NA
H0YAC1	27849.1	23039.8	13115.6	10710.7	26073.1	8651.7	14319.4	17758.6	17296.5	18409.8
H0YB13	NA	9241.55	NA	6121.3	6862	3835.63	NA	NA	NA	5705.96
H0YEX4	NA	NA	NA	NA	NA	NA	NA	NA	NA	NA
H0YF95	4495.55	11783.3	8579.75	12526.3	5899.31	9352.3	5374.22	5372.43	14350	7758.96
H0YH81	NA	NA	NA	NA	NA	915.912	NA	NA	NA	2530.94
H0YKL9	NA	NA	NA	NA	NA	NA	NA	NA	NA	NA
H0YL69	NA	NA	NA	NA	3650.58	NA	NA	NA	NA	3266.9
H3BLU2	10501.9	15770.7	14048.6	19659.3	10676.8	18442.7	10821.3	7156.67	15025.2	9218.71
H3BP20	20834.7	13786.9	20215.9	18106.3	13548	14954.2	16010.6	13807.8	22516.5	9903.18
H3BSM2	NA	NA	NA	NA	NA	NA	NA	NA	NA	NA
H3BTN5	NA	NA	NA	NA	2349.92	NA	NA	NA	NA	NA
H3BUU9	NA	NA	NA	NA	NA	NA	NA	NA	NA	3208.45
H7BY57	8041.65	3851.34	NA	5280.49	3420.91	3433.57	7646.56	4638.97	9372.73	3817.75
H7BY64	11595.9	10273.8	12451.5	16898.3	NA	19281.9	12004.7	11663.8	18624.7	10351.4
H7BZ94	NA	2169.79	2662.93	3347.1	NA	1683.37	NA	NA	2776.37	766.533
H7C024	NA	NA	NA	NA	NA	470.144	NA	NA	NA	NA
H7C0V4	NA	NA	NA	NA	NA	3901.66	NA	NA	110708	3373.32
H7C2K7	NA	2900.48	NA	2383.28	2300.51	1067.4	NA	11432.5	2636.16	2053.85
H7C2R7	291177	449224	981718	1.02317e+06	435128	16393.7	387567	7878.16	1135015	568544
H7C480	NA	NA	14611.2	14747.9	16534.3	NA	NA	NA	13458.5	20000.1
I3L1J2	2849.39	11278.9	12210.9	16275.4	6208.67	8441.31	8428.79	5588.77	22286.4	6550.39
I3L2R6	NA	1445.42	31253.6	1667.88	3684.89	3011.05	9530.4	NA	7384	2789.86
I3L2T3	NA	NA	NA	NA	NA	NA	NA	NA	NA	NA
I3L3J8	NA	NA	NA	NA	479.312	1929.44	NA	NA	1750.2	3576.37
J3KNP4	37735.5	25906.7	17156.3	21385.9	17635.9	18622.8	21438.4	11189.7	20624.3	20832.5
J3KPS3	15703.9	10350.2	1495.48	1312.76	7962.54	5739.29	2842.17	NA	NA	7725.74
J3KQ66	20959	22375.9	14730	17055.1	17073	15356.7	18002.1	10633.2	15060.4	16913.1
J3KSN0	NA	3727.43	3935.69	3222.53	2810.98	3530.13	NA	NA	4962.45	4248.84
J3QRS3	NA	NA	NA	NA	1124.12	485.437	NA	NA	NA	NA
J9JIG6	NA	NA	NA	NA	NA	NA	NA	NA	NA	NA
K7EIS2	104200	39733.2	40692.9	37453.5	46753.5	37017.4	19560.5	55894.9	42606.4	91718
K7EIS8	NA	NA	NA	NA	5143.25	NA	NA	NA	NA	4159.94
K7ELL7	6948.07	9000.5	8843.19	8563.88	7146.31	11359.6	NA	4712.23	10006.3	6882.89
K7ELW0	14744.3	21110.9	NA	NA	61598.1	16405.7	NA	NA	9260.66	NA
K7EN15	4998.55	6406.74	5842.47	NA	6075.62	3764.58	NA	NA	2185.66	844.71
K7ERG9	79013.8	96785.3	102561	93044.7	130149	88889.3	131989	130003	71429.8	93330.9
K7ERI9	9668.48	199831	4559.91	NA	10715.4	114341	753534	340588	844140	13164.5
O00115	32407	9346.53	11618.3	11436.4	10831.2	9609.94	8924.33	8312.85	14742.7	6528.62
O00187	NA	13783.1	NA	15741.9	NA	13636.4	13603.7	17802.9	NA	NA
O00292	6134.04	5472.78	7104.9	10187.5	5321.14	3795.2	4314.27	5138.34	5513.43	4108.13
O00299	NA	NA	NA	NA	NA	NA	NA	NA	NA	NA
O00391	35972.4	16976.6	15796.3	17879.5	21299.5	21127.7	18566.6	15274.1	23218.2	15794.8
O00451	470.294	NA	NA	NA	NA	NA	NA	NA	662.431	NA
O14498	17714.7	21547.9	14570.6	19033.3	34492.3	20476.9	19806.8	13120.7	19395.5	19829.9
O14791	5288.13	10745.4	5438.34	NA	12262.2	2934.57	8619.03	7970.56	1705.4	9454.89
O15031	1313.82	10944	7187.74	6648.44	5889.82	8628.36	NA	NA	8089.91	5168.43
O15240	7395.17	4698.44	4609.1	4929.26	6422.9	4376.11	NA	3365.07	2169.88	6321.35
O15537	48646.4	15970.1	12938.5	26243.2	13907.6	22805.9	25629.8	10057.7	31563.6	10516.3
O43505	73864.5	54848.1	71618.2	68654.3	54182	53390	52774.5	38424.7	120330	59946.4
O43529	NA	NA	NA	NA	NA	NA	NA	NA	NA	NA
O43707	NA	4069.03	9871.27	4947.68	3896.7	4624.09	1598.68	3371.08	6583.88	11516
O43827	25465.7	22250.6	10829.3	9987.23	16063.6	11098.9	13250.4	8404.28	9890.11	10502.2
O43866	13195.6	42926.5	12669.3	9887.82	76388.3	17756	18713.7	NA	18076.1	49734.8
O60462	8755.09	884.978	NA	NA	NA	4590.17	989.507	1256.43	NA	NA
O60575	4152.42	4810.55	NA	4965.35	3524.26	5728.04	NA	NA	5431.79	2174.68
O60814	6424.26	NA	NA	2587.93	2817.05	2463.82	8339.38	NA	NA	6700.59
O60938	35093.6	30512.5	21331.3	19404.6	32174.1	40019.5	62489.7	27434.6	24123.8	28383.7
O75063	NA	NA	843.9	NA	677.528	NA	NA	NA	NA	NA
O75093	25904.4	19652.4	15523.7	28583.4	16544.1	14637.1	19656	11719.6	22927.2	14683.8
O75326	4553.11	13012	6281.62	12285.3	15660.3	12230.7	14427.1	4337.15	8814.72	7117.55
O75368	NA	2488.7	NA	NA	10355.7	4729.75	NA	NA	NA	6990.99
O75493	1805.75	NA	NA	NA	NA	NA	NA	NA	NA	NA
O75636	NA	6075.85	4038.72	4371.76	4093.52	2089.67	NA	3367.5	4249.1	5429.48
O75752	6791.96	NA	NA	NA	NA	467.578	NA	NA	536.752	NA
O75874	NA	NA	NA	NA	NA	NA	NA	NA	NA	NA
O75882	11775	10027.2	7603.74	7967.72	9616.66	14371.1	7548.58	3830.48	6967.13	11724.1
O94919	2603.47	NA	NA	NA	NA	2836.98	NA	NA	4346.97	NA
O94985	227200	213697	256347	375868	265344	365141	137400	143265	422987	289305
O95158	NA	NA	NA	NA	NA	NA	NA	NA	NA	NA
O95274	291177	449224	981718	1.02316e+06	435128	194617	387560	7878.15	1.13501e+06	568544
O95428	11701.3	6066.12	5475.44	10353.9	9445.65	7857.56	9504.32	4409.09	11894.7	10216.7
O95445	3950.83	4026.25	2558.44	1187.22	25594.8	5818.68	654107	6141.36	5811.24	4651.4
O95497	NA	3153.43	8198.73	NA	4023.26	NA	NA	10200	4213.08	4191.64
P00338	36144.8	17183	14212.7	17032.4	30603.9	33105.4	23956.8	11945	14473.9	24717.1
P00352	2660.94	2098.87	NA	NA	11051.5	6664.86	2525.76	3671.31	NA	8947.73
P00390	NA	NA	NA	NA	17340.9	4726.19	NA	NA	NA	15741.1
P00441	4707.28	3466.25	NA	NA	23721.6	10332.9	5344.37	NA	4276.68	16434.6
P00450	410257	983304	1486568	1.58607e+06	895880	932860	611507	809850	1.63617e+06	962365
P00488	3611.78	NA	NA	NA	340.545	3604.53	3123.69	NA	NA	NA
P00491	NA	NA	NA	NA	20458.2	NA	NA	NA	NA	14370.4
P00505	NA	NA	NA	NA	NA	NA	NA	NA	NA	NA
P00558	14080	5132.78	2922.39	3832.73	14208.4	5556.24	5297.98	2233.24	3281.86	10633.1
P00568	NA	NA	4274.41	NA	7127.67	393.164	NA	NA	NA	8623.45
P00734	93973.5	142583	253835	187259	101234	169729	145258	169100	215483	147221
P00738	NA	33326.2	5729495	90677.6	164306	6500.21	24294	3.74068e+06	111739	400760
P00740	602.425	2514.58	1581.56	1257.53	2642.23	1873.66	30316.7	5595.91	1383.57	5085.82
P00742	18016.3	31952	43358.9	25816	28797.3	26306.9	34961.3	38173.8	33427.4	29725.4
P00747	353049	222022	646746	536686	240439	318918	233703	689495	596724	254354
P00748	45031	68684.2	55767	54417.7	57648.4	88807.1	47189.5	57312.9	53412.1	50035.8
P00915	223262	124099	9226.98	64489.2	1.03955e+06	90655.7	69643.7	3980.11	58868	645796
P00918	24358.2	12169.4	NA	13303.5	139837	11433	NA	NA	7850.11	88923.3
P01008	366240	494208	1.12152e+06	1.08228e+06	426731	582331	600572	833363	1.0986e+06	535728
P01009	1.09014e+06	1.74758e+06	1.92215e+06	2591431	1.74817e+06	1.29474e+06	1891112	2544539	2.524e+06	1.6363e+06
P01011	838928	1.30797e+06	805972	1.6136e+06	1.24937e+06	1.44312e+06	897996	611699	1.61529e+06	1.18897e+06
P01019	104115	156166	212571	275080	186127	121685	198973	220757	290160	173211
P01023	485620	2.7877e+06	662472	870957	789027	682281	1.67758e+06	441043	843196	880847
P01024	649738	874012	1.11885e+06	1073466	620932	508062	1.00379e+06	1.15277e+06	1262941	619402
P01031	41381.4	64484.1	92084.7	73666.9	34804.8	36661.3	70768.4	73038.9	97844	47181.7
P01033	32643.9	12157.9	37665.5	8620.45	22180.9	28746.6	16955.6	5986.47	54196.3	15808.2
P01034	3523529	1.3714e+06	1.03314e+06	1.24043e+06	996698	1053903	1468328	1.30146e+06	1372111	680679
P01042	160284	493984	835016	680449	360561	404004	377101	526272	802343	479116
P01344	NA	NA	NA	NA	NA	3796.56	NA	NA	NA	NA
P01599	6768.96	19388.3	10089.7	26521.3	15905	6176.29	20518.2	11668.6	19394	14992.2
P01602	331334	767542	721322	885472	252082	163200	953839	715909	732148	238586
P01619	689476	1.03964e+06	1.01634e+06	1.03221e+06	522347	482983	961463	717023	1.1336e+06	481612
P01624	953236	806612	915962	527730	356697	381712	677430	582448	716244	248456
P01700	222879	257965	201722	300323	234593	270937	314159	145644	360524	237574
P01701	81451.3	87080.7	63606	100606	87161	45455.7	144051	74360.1	112286	85683.1
P01704	37160.7	30487.9	NA	11336.6	7820.64	38633.2	5869.01	NA	16971.8	7262.01
P01705	13651.5	13557.7	36585	24420.4	NA	9525.55	13064.6	34465.2	27279.9	NA
P01706	8584.7	70104.9	54604.8	116927	25442.1	5288.13	66420.6	40160.2	136147	25565.4
P01709	24151.1	33246	21040.4	59134.7	42238.4	17466.9	35723.9	22699.1	64883.8	43020.1
P01714	59202.8	41418.2	39792.7	54899.5	13253.7	80096.2	55646.2	35795.9	66166.4	21235.8
P01742	NA	13375.8	3988.34	NA	6203.72	8020.95	15117	5913.79	NA	2831.73
P01766	8698.29	15100.5	5821.05	13638.4	10408.8	13935.4	24267.3	13363.7	22631.4	16181.3
P01780	95340.4	202073	206456	159144	218571	64210.7	237886	293528	124569	170395
P01834	3.26785e+06	4311134	3.22294e+06	3.59027e+06	4182079	1.7371e+06	6.81393e+06	6930202	3056028	2743367
P02008	8354.06	NA	NA	NA	14077.8	2591.7	NA	NA	NA	11787.3
P02042	256790	114565	15008.8	32292.8	1.15409e+06	90389.1	57248.9	8175.56	80717.9	668653
P02452	25551.2	5179	4877.04	2197.71	7949.23	21987.6	12636.5	NA	2445.95	8580.04
P02458	9721.57	2192.73	3894.53	4432.1	NA	1064.33	NA	8540.3	5384.24	2761.38
P02461	8677.24	3799.05	NA	NA	NA	5161.35	3311.66	NA	NA	1306.77
P02533	2217.84	6771.79	NA	8496.19	8984.66	3810.5	10511.6	6320.25	22557.2	13560.7
P02538	NA	NA	NA	NA	NA	NA	NA	NA	4452.2	9257.52
P02549	NA	587.558	NA	NA	1638.35	NA	NA	NA	NA	2391.88
P02647	445810	1.62848e+06	3182105	2.0396e+06	1.49404e+06	1.23637e+06	825034	1.96198e+06	2656307	2.35879e+06
P02649	1.28174e+06	1.32939e+06	1.14371e+06	874085	1.26297e+06	627451	910444	872821	1.25576e+06	1.21149e+06
P02652	116608	499543	629368	397711	311093	255112	296555	490846	488684	416090
P02671	307536	406172	307428	293551	278133	169938	257628	430647	224634	331861
P02675	307344	399312	292090	214542	263743	112616	229497	295877	213402	260744
P02730	NA	NA	NA	NA	8008.82	NA	NA	NA	NA	6824.24
P02741	NA	5138.21	32594	8230.42	NA	NA	NA	23731.3	6916.65	NA
P02743	30437.9	94156.5	89990.5	57282.8	39300.1	25725	68862.5	73219	62889.5	36758
P02745	30962.4	36694.9	27729.9	10438	39563.2	16847.1	37883.7	25544.1	NA	20557.4
P02747	84911.3	71593	53742.3	26513.8	60413.1	53957.6	57708.4	56718.3	51883.6	66674.8
P02748	58012	153806	378608	203882	126426	114750	173378	320550	256834	159678
P02749	947247	980018	1.67205e+06	1.26997e+06	573970	831449	1.49224e+06	1.61293e+06	1.61918e+06	787202
P02750	176912	499673	1.55194e+06	1.49365e+06	466754	466295	372171	919228	1.68065e+06	514319
P02751	169695	134313	40871	56705.3	118430	154454	87997.5	39568.6	56159.9	103290
P02753	91220.8	97633.6	90076.9	119384	48987.9	159251	145770	93766.7	141167	78626.6
P02760	306592	507489	544636	369900	232932	279045	336093	355389	401316	123752
P02763	670361	1.82307e+06	4694704	4.63479e+06	1.14146e+06	1.34036e+06	1.81897e+06	3.61893e+06	4.29128e+06	1499750
P02766	2.41773e+06	3057690	1.81956e+06	2562297	2.79113e+06	3.31743e+06	2.92932e+06	1981620	2.1871e+06	1.86795e+06
P02768	75317832	161408336	223367104	231200384	106517352	118713104	142758384	190287216	208701424	103953336
P02775	NA	NA	NA	NA	NA	NA	NA	NA	NA	17050.3
P02787	15733064	11668566	8953571	14576253	10823646	9832409	15368899	12129178	14557923	8861988
P02790	138497	454488	1.90626e+06	324982	177125	440814	967494	1.53783e+06	652774	302679
P02792	8077.81	4270.15	NA	NA	25835.8	3963.44	NA	NA	NA	25357.2
P03950	35525.8	7480.11	7734.5	10219	2702.62	23139.2	15100.7	12384	12380.8	2790.84
P03951	207470	81877	22862.3	29238	9874.45	6032.34	14528.8	6745.71	14288.1	5806.98
P03973	NA	NA	NA	NA	NA	2447.58	NA	NA	NA	NA
P04003	27850.4	33786.7	7199.33	5056.86	29032	17564.8	19243.2	15519.1	4412.25	19835.5
P04004	402980	462553	1243531	772140	440630	365391	583950	1.12972e+06	902260	544594
P04040	17962.2	12012.3	NA	8864.1	75260.6	6118.17	4390.56	NA	8395.81	71085.8
P04066	21342.8	10957.3	NA	3358.09	12486.3	10043	NA	6992.31	NA	4827.33
P04114	66291.2	60948.5	14145.2	15546.5	37263.5	27961.8	44171.9	27117.1	18040.6	33715.5
P04180	NA	NA	NA	NA	1078.04	NA	NA	NA	NA	2649.07
P04196	176488	214510	276270	251174	265418	188789	337055	366846	223505	279128
P04211	30994.7	3184.64	5885.64	33381.2	NA	2420.66	54897.3	4330.35	4186.38	3531.04
P04217	316963	659274	1.2902e+06	1.29911e+06	726539	731394	604908	861030	1.37511e+06	872687
P04259	62071.5	49537.9	61705.9	71828.8	42177.4	24991.7	146465	99369.8	130609	61277.7
P04264	116182	98131.7	167254	265655	142145	67576.2	343997	395129	444699	190191
P04275	3571.18	4763.47	NA	NA	2745.52	3664.3	NA	NA	2173.42	1843.52
P04406	97505.3	28341.1	11976.4	27008.5	40113.7	36143.3	40431.9	26306.6	19673.2	42065.5
P04430	7564.3	43133.1	NA	8469.96	18700.6	10160.7	46582.5	NA	7555.71	18167.5
P04792	NA	NA	NA	NA	1408.89	4745.07	NA	NA	NA	NA
P05060	31613.3	NA	NA	NA	NA	14666.2	NA	NA	7958.74	2352.06
P05121	8660.46	NA	NA	NA	2185.85	2237.75	NA	NA	NA	NA
P05154	57188.5	37250.6	93975.5	80654.6	50748.9	56408.4	42814.8	70060.8	76430.2	50436.8
P05160	NA	NA	32061.2	6258.03	1633.46	2814.57	4437.18	7180.61	4901.68	1586.43
P05408	29600.9	46833.3	103298	132592	29271.3	65060.5	26822.3	30310.2	148833	42307.4
P05413	NA	8482.65	4680.78	6199.37	14068.9	4429.57	5190.17	4033.66	5682.29	9926.54
P05543	10415.5	34116.4	52615.3	61713.8	33418.8	33070.7	28344.4	28087.6	50954.8	44279.8
P05546	179351	265980	448310	324030	204200	183665	278771	343262	452357	225070
P05787	NA	NA	NA	9155.77	3515.99	NA	NA	NA	13260.6	11421.1
P05813	NA	NA	NA	NA	NA	NA	NA	NA	NA	NA
P05976	NA	NA	NA	NA	NA	NA	NA	NA	NA	NA
P06310	NA	134781	121236	173806	58546.5	31744.9	38358.2	46530	188746	107738
P06312	51523.6	199440	123143	122848	150010	107645	107148	88703.6	118246	176173
P06396	535509	628279	521377	540040	535649	459814	664164	647866	576560	465858
P06681	22888.5	24460.7	24924.2	23658	21049.3	13890.3	24187	23130.1	20306	18450.5
P06702	NA	NA	NA	NA	3797.26	NA	NA	NA	2300.91	5181.67
P06703	101315	37490.6	11808.1	22902.4	75507.5	47419.2	43915.6	23669.5	24155.2	52474.2
P06727	515759	1.50419e+06	2262035	1.94997e+06	572075	1.07907e+06	983289	1.42449e+06	2.18289e+06	770616
P06733	45856.8	22310.6	13703.4	36504.8	28796.9	38434	41959.3	20555.4	13855.5	37284.5
P07195	11359.8	5605.32	3570.75	5569.44	26078.1	6493.02	7828.45	2795.44	10282.6	21832
P07315	2705.67	8250.47	5421.02	17616.1	10436.3	3378.63	16862.8	5672.33	20200.6	9689.17
P07320	NA	NA	NA	NA	2835.53	NA	NA	NA	NA	NA
P07357	33029.7	27358.9	29059.8	21548.3	34309	15581.8	25389.4	33221.9	26909.6	16365.1
P07360	68982.5	46405.8	34138.4	36430.8	33507.9	32538.3	76419.5	60299.9	40171.8	29029.7
P07384	NA	1422.44	NA	NA	6347.11	2145.95	NA	NA	NA	4827.3
P07437	NA	1208.94	NA	NA	1	NA	NA	NA	NA	5939.52
P07451	9412.7	NA	NA	14196.4	18829.9	12915.3	12312.6	NA	NA	15113.6
P07585	38206.4	38168.6	29711.9	35412.5	29920.5	40208.2	36883.3	28768.8	59322.2	29155.9
P07686	25904.3	18974.4	17504	14173.9	13147.1	15622.5	9466.68	12367.5	16900.4	7840.09
P07711	25039.9	17179.3	13208.6	21734.6	19070.3	22537.6	16541.4	9170.83	22093.6	15329.2
P07737	29881.6	7432.47	NA	4873.78	14514.5	5729.53	103365	NA	142619	7539.4
P07738	5940.36	4282.62	NA	NA	33172.4	3474.66	1758.55	NA	2170.39	26790.5
P07858	25426.9	10137.1	18310	9712.84	53045	10346.6	20441.4	16602.7	19590.1	13009.3
P07900	NA	1888.27	NA	NA	6593.38	1655.37	NA	NA	NA	4442.23
P07996	7623.6	1065.87	NA	NA	4099.16	3804.06	3151.98	1459.36	NA	3061.19
P07998	133110	91403.4	59894.3	75274.5	59873.7	257037	141508	53781.4	93848.7	79655.4
P08185	76644.9	91704.4	112308	116560	101923	92896.8	84417.4	66502.7	207829	70458.8
P08253	23972.3	32075.5	25079.5	25955.4	35008.6	29720.3	17067	14847.9	25280.5	26865.3
P08294	47702.7	88312.5	72699.7	61551.8	53833.3	62835.1	47443.8	30556.1	119553	53963.7
P08493	140332	118498	89910	66148.1	132399	155808	86468.6	95537.3	88721.7	162531
P08571	45783.5	36242.2	31084	29539.5	37835.1	44281.2	41260.4	29909.3	34486.3	41152.1
P08581	NA	NA	NA	NA	NA	NA	NA	2812.25	NA	451.151
P08603	197048	145269	121063	146676	93545.6	174403	240850	181177	148628	124569
P08697	70065	51071.8	79183.3	81497.7	62283.2	52459.1	77553.6	117899	84559.5	38717.3
P08758	NA	NA	NA	NA	1550.63	NA	NA	NA	NA	669.805
P08779	20962.9	50863.7	24090.2	10293.3	25149	14020.6	26361.4	15377	76640.3	21329.8
P09104	7181.13	6047.33	4463.7	NA	4510.09	5974.81	2291.64	NA	7438.63	3911.23
P09105	NA	NA	NA	NA	NA	NA	NA	NA	NA	NA
P09211	2614.4	NA	NA	NA	4572.09	5903.95	NA	NA	842.575	3945.8
P09382	NA	NA	NA	NA	16571.2	1081.13	NA	NA	NA	9750.27
P09486	15390	14419.4	12924.2	14292.5	7419.57	19381.5	11197.1	7807.11	15457.4	8103.14
P09960	NA	NA	NA	NA	863.045	NA	NA	NA	NA	NA
P0C0L4	434520	129832	174464	54965.6	15147.8	230434	151745	180967	63876.1	6444.47
P0C0L5	719620	570418	710702	600939	661291	513254	560243	679235	648886	576491
P0CW18	NA	NA	NA	NA	NA	NA	NA	150.655	NA	NA
P0DJI8	NA	5115.95	71734.9	10579.3	8230.47	NA	NA	16017	5767.54	4548.11
P0DOY2	913757	1.40054e+06	1.57788e+06	1594590	1.62042e+06	1.02318e+06	1.59784e+06	1.88653e+06	1.30712e+06	1.6227e+06
P10153	6186.75	NA	7965.89	1968.52	5294.65	8169.91	NA	NA	2495.82	3232.49
P10253	8071.2	3479.24	5483.47	5215.38	3635.65	4327.5	NA	3423.95	6887.86	1842.69
P10451	710724	498271	214240	216622	854837	581235	470431	267403	189115	415316
P10523	18815.9	6315.61	4520.35	3391.94	4998.8	6915.01	4526.56	NA	6987.55	6114.32
P10586	14993.8	7430.21	146888	NA	3053.73	3257.67	NA	NA	5513.9	2591.07
P10599	5828.27	NA	NA	NA	NA	NA	NA	NA	NA	NA
P10643	39557.7	45255.2	39910.8	38188.7	29674.1	40220.7	58552.1	46843.5	29987.4	28208
P10645	5656.99	12212.9	9460.98	20468.8	11987	8887.99	768.244	7240.13	20203.3	13853.4
P10745	361776	472948	496225	425108	163974	380069	412142	349752	497154	171785
P10909	2.45376e+06	2828098	3.86459e+06	2.67111e+06	3153010	1.90973e+06	1.75061e+06	2.88575e+06	2.97066e+06	2.9527e+06
P11021	7321.58	8454.93	4183.56	7374.03	8906.1	8472.94	4552.96	4604.35	7520.19	6971.03
P11047	NA	3293.78	1500.6	1696.1	2626.47	3738.8	NA	NA	3287.84	1406.94
P11166	NA	NA	NA	NA	513.303	NA	NA	NA	NA	NA
P11277	4483.08	1292.79	NA	3235.05	8449.9	5938.47	NA	10849.5	12439.5	6261.94
P11279	10333.1	13632.2	8095.48	18739.9	21944.7	14856.3	NA	NA	15071.5	14957.9
P12035	NA	NA	NA	NA	NA	NA	NA	NA	NA	NA
P12110	4576.72	4486.02	2041.27	2364.82	3676.26	8327.54	2227.35	953.746	2933.69	3105.98
P12111	6197.26	9443.87	5026.24	5457.35	7756.25	6939.05	6579.11	5652.28	6541.79	4491
P12271	3157.15	1955.88	NA	369.081	NA	3732.07	NA	NA	NA	672.26
P12277	1195.84	NA	NA	NA	1457.63	2327.58	NA	NA	NA	2128.45
P12955	1044.41	7101.57	NA	NA	4935.96	4696.06	2086.04	2323.75	8831.72	4700.05
P13284	12423.2	4858.63	NA	NA	NA	NA	NA	NA	7454.36	NA
P13473	20015.6	68440.1	25502.5	54322.2	45484.5	72568.2	31446.5	23139.4	NA	71903.9
P13521	11512.4	7865.14	17781.3	5881.74	1688.69	5298.94	NA	7517.21	6903.07	2247.72
P13645	37798.7	200897	31346.4	26907	52365	19573.8	62141.1	27280.1	159369	22731.4
P13647	23558.7	52985.1	44982.9	40637.8	37241.7	24001.6	54903.8	52519.8	93277.4	45620
P13667	NA	NA	NA	NA	1891.6	769.882	NA	NA	NA	1140.26
P13671	52244	55346.6	61171	51829.4	49168.1	31722.2	66566.9	77763.9	60621.5	44571.4
P13716	NA	2808.46	NA	NA	32611.6	NA	NA	NA	NA	16769.7
P13796	7863.46	4011.17	7833.96	8291.93	7114.14	3672.77	8607.44	7321.46	9963.61	5610.05
P14174	12277.5	6675.89	3779.66	7419.75	14624	34292	6907.46	1148.52	4923.02	23850.1
P14543	5172.45	4604.66	3529.89	5828.83	1960.33	4091.97	2770.7	NA	6454.55	2994.97
P14550	NA	NA	NA	NA	NA	NA	NA	NA	NA	1277.92
P14618	40938.8	11640.8	7417.42	10789.2	21407.1	13826.4	16375.2	13412.1	8527.17	13775.1
P14625	4785.82	7248.61	7361.52	8266.67	5841.92	7832.38	NA	5482.84	7533.16	6025.06
P15090	NA	NA	NA	2773.05	4534.22	239.013	NA	NA	3610.11	2655.43
P15121	NA	NA	NA	NA	2781.71	NA	NA	NA	NA	1867.49
P15169	6995.42	10800	7814.58	5018.26	8519.62	5403.47	10691.4	NA	6858.24	8814.88
P15291	6109.13	18294.1	11978.8	11943.1	17582.9	18423.5	20077.6	12974.2	13838	9885.56
P15924	15357.3	NA	NA	NA	3715.4	NA	NA	NA	NA	4990.93
P16035	32794.8	12898.5	8836.33	13113.7	16824.7	17762.1	17656.4	10105.7	17557.8	16206.6
P16157	NA	10299.4	NA	NA	3085.03	4031	NA	NA	NA	2060.04
P16452	NA	NA	NA	NA	NA	NA	NA	NA	NA	NA
P16519	NA	NA	3857.9	NA	2561.63	NA	NA	1450.86	1401.28	2072.18
P16870	22751.7	27184	45297.3	35945.2	23172.5	35149.4	18609.7	35028.7	46539.1	18729.2
P17050	NA	NA	NA	11144	3867.13	9605.57	NA	NA	12947.4	NA
P17174	8178.28	NA	NA	NA	9234.13	NA	NA	2098.83	NA	5291.56
P17900	46142	13099.4	7547.3	8190.38	11619.8	16334.8	8432.17	8758.27	11676.4	10771.4
P17931	3715.04	NA	NA	NA	4151.87	2783.05	NA	NA	2322.05	2412.66
P18065	48910.5	28310.3	12470.2	23268.3	22422.1	35817	38256.6	23675.5	20619.7	21424.7
P18206	NA	NA	NA	NA	NA	NA	NA	NA	NA	NA
P18428	NA	6710.93	6897.69	NA	9456.74	651.592	3996.83	15788.4	NA	4401.62
P18669	11423.3	4142.36	2259.5	4183.86	6205.22	5473.14	5550.99	NA	1028.56	6047.41
P19021	4838.33	6014.1	7848.83	5191.89	3765.08	5950.56	4530.79	3740.27	7443.83	5479.94
P19022	28913.4	40662.2	41767.4	19139.9	44358.5	31018.5	20364.4	16806.1	58152.5	31947.8
P19320	4180.96	12454.9	11375.6	8421.93	10859.6	4825.9	NA	NA	10847.4	8448.25
P19652	454071	796533	1.02769e+06	1.26151e+06	786111	600054	997218	1.45952e+06	936793	619394
P19823	43469.7	101518	246466	159223	165183	55464.1	75418.8	193304	185128	218973
P19827	87998.8	98832.2	192536	147809	121906	73117	102736	159758	179646	153584
P20396	NA	NA	NA	NA	5184.77	NA	NA	NA	NA	4827.27
P20742	NA	NA	NA	NA	1025.07	4954.39	NA	NA	3103.1	3953.82
P20774	11889.4	13273.6	19597	21706.2	12353.2	14468.3	16566.8	14338.4	21389.1	9993.14
P20827	17114.5	20348	13602.6	15281.3	19015.7	28290.3	12622.1	6063.37	21024.2	20687.9
P20849	4207.45	9230.75	7791.81	10778.8	10393.3	16744.9	4587.72	4219.12	9991.53	12410.7
P20851	7688.42	13372	4328.05	NA	14127.7	10102.1	6913.76	NA	8306.37	9854.05
P20908	1500.16	NA	NA	NA	NA	2625.39	NA	NA	NA	NA
P21810	7417.12	1778.57	NA	NA	3559.34	3732.81	6733.62	2728.39	NA	2191.59
P22304	14321	17322.5	15939	13241.5	8038.54	10426.2	13855.9	NA	28040.4	8265.81
P22314	NA	3583.57	3739.99	1189.81	NA	1727.37	NA	4164.47	4391.91	NA
P22692	11767.4	12069.8	9214.34	10523.2	6695.17	24708.7	21886.1	16671.5	9885.14	4186.36
P22792	14130.4	20989.1	8132.15	10780.5	18248.2	9747.75	16547.9	12496.2	10763.3	23980
P22891	1840.15	8495.07	6246.33	5862.9	3103.92	3552.86	7359.51	NA	4860.46	6352.93
P22897	NA	761.595	NA	NA	14783.3	NA	NA	NA	NA	6867.32
P22914	5667.35	45184.6	23734.8	64446.7	151857	23856	49299.8	18988.4	64559.5	174869
P23083	6889.91	9451.24	8342.72	NA	NA	11755.8	11967	8387.23	NA	2439.03
P23142	104869	97484.8	112853	135665	90055.1	117820	78335.3	77209.2	169050	69139.2
P23470	NA	2991.41	NA	953.928	4475.55	2713.75	3210.77	NA	2179.57	1782.76
P23471	13204.5	12614.3	7878.55	12537.2	8549.87	8942.05	8658.81	7759.31	12356.1	7038.81
P23515	NA	NA	NA	NA	NA	NA	NA	NA	NA	NA
P23526	NA	NA	1701.23	NA	2687.69	NA	NA	NA	2308.3	2927.31
P24593	124192	26898.9	12605.4	30156.1	18177.5	53409.1	18749.5	13659.7	30507.1	19438.7
P25311	201807	337405	814075	737801	209744	403970	403939	491758	799001	269671
P25774	15506.4	6680.25	NA	NA	6817.16	1250.41	4650.11	1888.43	NA	3296.22
P25788	NA	NA	NA	NA	1762.32	NA	NA	NA	NA	1940.74
P26038	8291.44	3592.79	NA	4761.64	10209.8	3517.81	5701.7	4355.56	NA	8753.96
P26447	18490.8	3282.91	NA	NA	12390.1	7389.92	12000.9	5690.56	NA	6007.31
P26572	NA	NA	NA	NA	NA	580.954	NA	NA	NA	731.102
P26992	NA	3992.78	NA	NA	3317.07	1836.1	1438.71	NA	2558.82	NA
P27169	18854.1	29870.6	28801.5	24056.2	33621.2	12648	22367.2	38632.8	23261.8	29087.1
P28066	NA	NA	NA	NA	4041.1	NA	NA	NA	NA	2890.16
P28070	NA	NA	NA	NA	4473.46	NA	NA	NA	NA	2718.84
P28072	2094.28	NA	NA	NA	9894.78	1872.71	NA	NA	NA	10231
P28074	NA	NA	NA	NA	2228.32	NA	NA	NA	NA	1456.05
P28799	NA	NA	NA	NA	NA	NA	NA	NA	NA	NA
P29279	8752.38	2288.17	NA	5138.43	2117.34	19862.1	NA	NA	6163.46	3650.11
P29401	6280.16	5661.78	NA	NA	5017.48	2199.86	6500.17	652.017	5980.46	5019.96
P29622	45967.7	92806.8	89590.3	68045.2	72588.6	70289.9	77411	74101.6	70512.7	83681.8
P30041	14805.4	5996.55	465112	2880.35	83184.7	4838.6	112886	896129	2845.44	39437.5
P30043	28490.3	20259.7	NA	40378	107310	20047.6	NA	NA	21191.2	66556.6
P30086	7581.52	31878.4	151439	8419.86	24051.5	18989.7	5979.34	39009.6	44299.7	22481.9
P30101	NA	NA	NA	NA	1556.36	NA	NA	NA	NA	1521.39
P30530	NA	8571.81	7273.16	7402.26	7727.03	9492.01	NA	NA	10423.6	5271.39
P30740	9274.02	NA	NA	NA	4931.53	2180.12	NA	2663.18	2680.34	2438.85
P30838	5882.23	5375.21	7624.86	NA	2842.78	7964.21	17379.7	20015.8	6744.81	16544.5
P31025	37998.8	50722	2175.63	5033.59	32841	25754.3	43083.1	2915.48	4166.89	9488.71
P31146	NA	NA	NA	NA	1444	NA	NA	NA	NA	1078.75
P31947	NA	NA	NA	NA	NA	3446.79	NA	627.983	NA	NA
P31949	2543.79	1066.89	NA	NA	3185.32	NA	NA	NA	NA	1775.29
P32119	84654.4	46269.8	7004.89	37000.5	476179	51673.9	21269	2057.95	37736.7	404256
P33908	23736.3	13320	27827.8	19741.1	12274.1	10310.2	17427.3	15340.7	12242.2	10160.3
P34096	NA	NA	NA	NA	NA	NA	NA	NA	NA	NA
P35527	232358	24481.1	79445.3	478421	103627	74867.1	231894	194551	617719	238896
P35555	45618.9	27564.1	22525.1	36286.8	29172	60380.7	25538.9	22206.9	41050.2	31760.1
P35625	7206.1	NA	NA	NA	NA	NA	NA	NA	NA	NA
P35754	NA	NA	NA	NA	785.592	NA	NA	NA	NA	613.612
P35858	14820.5	9256.67	32747	21183.1	17959.4	18910.6	10507.1	28518.5	18543.6	12770.9
P35908	122974	241143	60441.6	83353.1	86661.7	34182.3	78675.3	67591.6	264697	74715.3
P35968	3.53264e+06	3.93274e+06	5137922	5803594	4.35205e+06	2888.71	3578.48	10680.9	1539.86	9297.79
P36222	212898	241297	82214.9	74183.9	298056	40925.9	162249	83405.9	79764.9	151197
P36955	3177841	2.6038e+06	2.02927e+06	2.6717e+06	1.58009e+06	2.19021e+06	1.99216e+06	1749540	2.3885e+06	1.36709e+06
P37837	10457	5422.77	NA	4960.4	22122.5	8777	NA	NA	4311.95	18694.2
P39060	42763.7	24567.6	9572.47	7418.82	33800.6	13594.8	12184.8	11213	12615.9	22829.7
P40121	NA	4343.27	NA	1555.53	7536.9	4099.99	NA	NA	NA	6113.17
P40189	NA	2731.69	3112.21	NA	5139.54	4996.74	1409.92	NA	2840.26	2972.67
P41222	3210400	4.01659e+06	1.43319e+06	3.33431e+06	2.97424e+06	4729158	4572536	2.13824e+06	2814041	1.63562e+06
P42785	13142.6	7941.03	8147.99	7628.94	8897.49	4362.59	NA	2798.77	6785.83	5624.56
P43121	NA	13859.2	5577.6	4728.7	4627.94	13185.7	8937.67	NA	4488.81	4321.92
P43234	NA	9990.07	10522.1	2325.46	7398.19	10711.5	NA	NA	9387.28	5736.44
P43251	27418	47665.8	27472.4	38628.9	29878	41365.9	31836.1	15575.5	73336.3	38589.2
P43320	NA	18108	9420.62	37755.7	137055	3923.83	5064.6	30576.2	28501.2	101715
P43652	45199.1	136215	132408	170037	151126	94713.6	119616	118328	241281	147974
P47929	NA	NA	NA	NA	NA	NA	NA	NA	NA	NA
P47972	1094.23	4677.01	13487	13237.8	8913.2	4521.09	33711.9	2116.29	7736.18	4341.79
P48723	5928.54	9184.13	9493.42	8482.32	5120.41	8270.17	3778.42	4223.96	12500.3	5382.21
P49257	NA	2426.85	2748.72	3218.91	3576.55	2615.97	NA	NA	3929.24	2341.94
P49788	27915.5	13434.9	2920.14	9006.83	9530.15	1793.29	4957.08	NA	NA	2663.26
P49908	11460.9	9531.43	8241.33	15155.5	13052.2	13084.8	8856.53	8978.32	13119.4	11137.6
P50395	9202	2114.54	NA	NA	10338.1	2414.97	NA	NA	NA	7864.74
P51884	76268	202847	238692	236253	142114	222021	121359	94175.3	298675	157305
P51888	83207.4	25038.9	43244.7	31774.7	38258.8	25079	22500.7	51494.3	56093.9	38303.4
P54802	50150.6	3429.6	NA	1792.06	3058.89	2490.92	207.501	1578.46	NA	950.073
P55001	NA	NA	NA	NA	NA	3537.92	NA	NA	1177.17	NA
P55058	12036.6	14467.9	15984.4	8050.28	15069.4	7038.94	9880.83	12548	8823.79	11732.4
P55072	NA	NA	NA	NA	NA	NA	NA	NA	NA	NA
P55268	NA	1254.31	NA	1795.18	1425.35	2742.83	NA	NA	2876.97	1471.69
P55283	NA	NA	NA	2570.78	NA	2041.07	NA	NA	NA	NA
P55290	4177.53	7699	12442.1	8465.5	6283.27	7508.27	5778.32	NA	9082.36	5053.57
P59665	23990.3	3805.18	3310.14	9382.11	3431.42	15124.2	12473.6	10405.8	14554.9	6769.91
P60174	18547.5	12969.4	8016.13	17626.3	38387.5	18174	8531.93	12592.1	10033.3	36450.3
P60709	78231.7	76923.5	39374.6	51109.5	119362	51590.9	66213.4	37697.5	44612.9	101733
P61457	NA	NA	NA	NA	2444.57	NA	NA	NA	NA	NA
P61626	79969.7	30282.5	14887.7	16218.5	28832.4	14763.3	16544.9	21044.7	13144	9152.45
P61769	1952274	1.17956e+06	917563	595872	305474	1.31472e+06	1.5694e+06	898857	790273	250015
P61812	23574.8	3853.8	6709.11	11266.9	9051.12	6801.97	5176.58	8136.03	13306	7705.59
P61981	NA	1352.76	NA	NA	2423.3	1769.49	NA	NA	NA	2919.43
P62258	987.987	NA	NA	NA	5941.99	2185.63	NA	NA	NA	4252.35
P62736	NA	NA	NA	NA	4134.14	NA	NA	NA	NA	452.915
P62805	5809.82	NA	NA	NA	6730.66	1721.49	NA	NA	NA	1993
P62937	4943.89	375.313	2078.23	3232.51	10888.7	5171.21	2719.62	9074	1639.95	12773.9
P62942	NA	NA	NA	NA	4828.84	2282.72	NA	NA	NA	2745.44
P62993	NA	NA	NA	NA	2154.44	1329.28	NA	NA	NA	2209.27
P68366	NA	NA	NA	NA	5056.82	2446.26	NA	NA	NA	3577.99
P68871	4.96072e+06	3069772	179750	1.07392e+06	39440280	1.60512e+06	1.18174e+06	57024.9	1.04452e+06	30585388
P69905	5781345	1.75736e+06	91201.2	748265	24372458	751539	918001	54336.4	884615	11422766
P78324	6811.66	4375.74	6652.42	NA	3512.74	7685.84	9733.83	1563.16	4487.66	2712.37
P80108	3862.68	16239.8	19326.1	11836.1	6861.57	11533.5	5690.79	9844.05	11370.2	9259.47
P80188	4541.38	2310.84	1108.39	3997.16	1934.07	NA	NA	NA	3378.35	1214.01
P98160	45155.8	21887.2	28941.5	32720.5	14944.8	24464.4	25142.1	23622.8	35356.3	11961.6
P98164	22528.1	17614.8	19934.3	16185.5	8993.25	20465.6	14749	13072.2	17050.8	40455.9
Q01459	NA	NA	4152.12	NA	4742.15	NA	NA	4482.16	2414.5	5543.54
Q01955	NA	NA	NA	NA	NA	1581.27	NA	NA	NA	NA
Q02413	NA	NA	NA	1930.11	1096.6	NA	NA	NA	4396.33	962.242
Q02487	9439.79	13655.2	8861.96	14472.3	12611.3	17606.5	13838.7	6140.42	15880.6	8229.09
Q02747	NA	NA	NA	NA	NA	3452.73	NA	NA	NA	NA
Q02809	2458.87	NA	NA	2134.47	3332.73	1339.64	NA	NA	2438.42	NA
Q02818	16481.7	11404.9	7057.07	14110.2	22928.1	16182.6	8036.51	8478.02	11726.1	14399.3
Q02985	25404.3	13255.8	33958.3	34410.6	2033.1	15818.1	25116.6	27322.3	40942.4	2013.21
Q03591	16097.7	8561.06	17090.2	17049.3	6517.15	33830.1	20984	19441.9	24277.8	12952
Q04695	NA	NA	NA	NA	NA	NA	NA	NA	NA	2511.94
Q04917	NA	NA	NA	NA	2756.67	731.801	NA	NA	NA	NA
Q06033	4085.38	13841.4	13473.7	11672.3	14775.6	2652.17	7542.8	25777.2	11705.2	11009.4
Q06481	14083.5	13827.5	11302.2	18110.5	6420.69	15233.8	12583.5	11674.3	13800.8	5850.75
Q06830	97311.9	68640.9	39868.7	89292.3	541037	83968.8	77285.1	11970	92736.4	466301
Q07507	12979.2	9880.61	6723.95	9014.39	8046.58	15540.8	19979	9793.07	29577.6	9688.59
Q07954	NA	2311.41	NA	NA	2672.08	NA	NA	NA	NA	NA
Q08188	NA	NA	NA	NA	NA	NA	NA	NA	NA	NA
Q08380	49428.4	24540.8	26404.8	30693.4	15332	46684.4	34415.5	20497.7	43604	18353.5
Q08397	22579	4515.49	4493.58	NA	7102.87	7522.58	4610.44	6414.83	3577.68	6482.66
Q08431	NA	NA	NA	NA	1745.69	NA	NA	NA	NA	NA
Q08554	NA	NA	NA	NA	NA	2808.66	NA	NA	NA	NA
Q08629	16030	5759.04	15185.4	13436.1	8170.71	10251.9	9124.05	7835.22	18341.7	8583.97
Q0P6D2	10654.9	4628.43	5566.97	9777.74	4314.86	4709.73	1343.92	3607.67	8467.92	3504.54
Q10471	15983.3	5780.28	4160.62	7674.83	4705.85	6738.32	NA	NA	9956.15	7331.09
Q10472	2987.46	NA	NA	4778.59	NA	1493.38	NA	NA	4673.61	1352.36
Q12797	3433.6	NA	NA	827.07	NA	735.694	1557.43	NA	407.116	903.042
Q12805	800509	112028	506705	389169	379761	482419	324776	279189	634269	285826
Q12841	69815.9	13225.8	17316.1	21483	42522.7	26371	43984	24084.5	17580.7	12907.9
Q12860	5224.78	8900.93	8590.24	10705.6	5859	5666.66	6469.51	6099.87	9746.71	2246.22
Q13217	3949.16	NA	NA	NA	2485.53	1869	NA	NA	1241.5	2833.72
Q13219	NA	NA	NA	NA	NA	NA	NA	NA	NA	NA
Q13228	8243.01	4622.97	2002.08	3305.26	24332.4	4818.79	NA	NA	2505.33	20706.3
Q13231	NA	10694	9776.63	7979.72	NA	NA	13575.6	16013.1	11634.8	NA
Q13332	NA	3299.35	3863.49	3821.9	3044.57	3196.02	NA	NA	4841.71	2870.84
Q13421	NA	5910.53	NA	NA	NA	NA	NA	NA	NA	2433.41
Q13790	NA	NA	NA	NA	NA	NA	NA	NA	NA	NA
Q13835	NA	NA	NA	NA	NA	NA	NA	NA	NA	NA
Q14055	36024.2	19710.1	16515.9	18442.9	7884.6	15010.6	16661.9	14920.9	19747.8	5982.61
Q14112	8681.6	NA	NA	NA	3246.97	611.753	NA	NA	NA	7656.9
Q14118	28633.5	37748	35778.8	36121.4	27967.9	40549.5	19795.8	18211.1	43728	32801
Q14126	NA	5074.75	1334.29	5531.56	4493.06	5790.37	NA	2605	5459.01	2697.67
Q14393	20087.6	17849.8	8415.4	16991.4	17458.9	18193.6	13722.1	9039.94	28368.5	14178.1
Q14515	11518	19269.5	24328.4	25142.1	20099.2	16970.6	11671.6	14218.4	26611.8	25117.1
Q14520	11630.3	9735.71	10901.6	16513.9	9544.73	11325.5	17721.6	15684.6	14901.7	8161.12
Q14563	12737.9	9120	3053.68	7612.34	9682.32	4942.82	7954.73	5801.67	5522.78	6831.28
Q14574	8124.5	12496.5	13146.9	4414.87	7579.02	9129.94	14352.8	19538.6	5311.07	2265.36
Q14624	92975.2	185465	251157	198552	138179	121024	136807	182126	225712	154566
Q14982	NA	NA	NA	NA	NA	NA	NA	NA	NA	NA
Q15113	29574.3	23856.1	28866.3	14066.4	30470.5	40195.9	20387.5	19360.7	31792.9	19930.3
Q15223	NA	5713.7	4005.1	6129.51	2589.2	4865.29	NA	NA	7504.59	4459.51
Q15293	2084.93	NA	NA	NA	NA	NA	NA	NA	NA	1573.56
Q15582	61082	40165	20575.5	24752.1	41865.3	37606.8	47384	27841	31272.3	23413
Q15782	2695.19	1776.45	NA	5844.41	5532.23	NA	NA	NA	NA	1877.3
Q15818	NA	3947.22	NA	2656.22	NA	NA	NA	NA	NA	5730.48
Q15828	NA	9127.96	NA	6888.5	4248.3	5325.4	NA	6047.5	10635.9	4984.26
Q15904	5718.42	22427.4	17915.6	14097	16181.7	13257.5	4539.28	7629.34	11836.3	13382.5
Q16270	412369	199577	306844	368741	241847	360584	306604	211297	463250	228103
Q16568	NA	NA	NA	NA	NA	NA	NA	NA	NA	NA
Q16610	27373.1	37155.1	24229.2	29339.2	59438.2	21849.9	53942.2	25217.8	24518.6	41715.3
Q16658	NA	NA	7046.17	NA	600.041	NA	NA	NA	2634.53	NA
Q16661	NA	NA	NA	1855.82	NA	3276.62	NA	NA	2600	736.349
Q16706	6038.61	2181.03	512.6	2986.18	3749.69	1319.74	NA	NA	2762.16	1905.5
Q17R60	36854.1	37129.8	49976.7	46319.2	20661.8	40125.5	14168.8	23275.3	37839	17165.2
Q495W5	4824.69	3563.2	NA	3620.12	NA	3741.93	NA	NA	2718.4	NA
Q5D862	NA	NA	1915.54	NA	697.135	NA	NA	NA	5297.08	NA
Q5JSG7	2693.81	2510.19	1.11698	NA	1	2045.82	NA	1.06341	4580.15	NA
Q5KU26	10700.4	14941.3	5292.38	13320.2	21102.4	17587.6	14125.2	13254.1	9631.13	10877.9
Q5T123	19119.8	14575.7	12332.6	34897.3	27848.4	21721.8	14232.7	9796.3	33671.1	29819.2
Q5T749	NA	NA	NA	NA	NA	NA	NA	NA	NA	NA
Q63HQ2	NA	NA	NA	NA	NA	1063.56	NA	NA	NA	NA
Q641Q3	NA	NA	NA	NA	1616.25	6437.65	NA	NA	NA	NA
Q6E0U4	NA	NA	NA	NA	487.997	1017.76	NA	NA	NA	NA
Q6EMK4	25372.3	41590.3	26590.5	34115.6	32252.1	44985.2	28928.7	15864.2	39043.2	27878.8
Q6MZW2	NA	1269.26	NA	3325.67	4024.89	2049.76	NA	NA	2926.91	2483.56
Q6PCB0	13979.2	3199.14	NA	NA	3468.83	3619.46	8713.02	12753.9	3959.93	4058.63
Q6UVK1	2464.77	NA	NA	NA	NA	NA	678.475	NA	NA	NA
Q6UWP8	NA	1361.85	NA	NA	NA	1071.52	NA	NA	849.235	1559.65
Q6UX71	26087.5	28508.4	27209.2	34709.3	62915.5	26748.4	21174.7	15528.7	43690.6	46720.8
Q6ZMP0	9546.93	2595.68	4470.9	5037.49	5117.55	9065.74	NA	9959.48	5042.31	7620.3
Q6ZSJ9	NA	NA	NA	NA	NA	NA	NA	NA	NA	NA
Q6ZVX7	NA	NA	NA	NA	NA	719.608	NA	NA	NA	NA
Q7Z3B1	NA	4333.92	7580.88	12683.1	5009.07	12252.3	NA	NA	15625.7	9881.09
Q7Z7H5	NA	511.614	NA	NA	1525.64	NA	NA	NA	NA	NA
Q7Z7M0	16332.7	NA	NA	NA	1449.41	NA	NA	NA	NA	NA
Q86SR1	6842.85	1258.83	NA	NA	1652.08	1971.64	NA	NA	1895.78	810.325
Q86UD1	44455.9	55344.5	26472.3	17530.4	21759.6	20320.5	40416.1	35621.4	18632.9	22256.2
Q86X29	5196.36	4836.02	4755.59	11489.2	1871.72	5898.81	NA	44840.2	6076.71	2506.16
Q86Y38	NA	1376.77	NA	NA	742.486	995.181	NA	NA	4445.98	NA
Q86YZ3	1987.69	NA	NA	6146.75	2460.62	2317.4	18906.4	9979.83	14150.2	7741.43
Q8IUX7	21351.8	12314.7	6012.34	10635.5	16209.2	14829.6	10517.8	5635.76	12445.5	17177
Q8IV08	9532.5	10804.4	8461.94	9883.65	8708.8	9443.77	NA	3549.75	10033.8	7900.51
Q8IWU5	NA	4601.08	6973.62	6537.58	5966.31	6425.18	NA	3106.09	8881.93	4400.4
Q8IWV2	2945.24	3343.33	3438.44	4704.86	1998.54	2672.97	1205.22	2662	3563.01	1889.02
Q8IWY4	NA	NA	NA	NA	NA	NA	NA	NA	NA	NA
Q8IZJ3	136439	43878.4	56877.7	70841.2	50707.9	68593	52693.8	51246.5	88470.6	44894.1
Q8N1N4	30841.3	32220.2	9985.39	53604.1	33254.8	23851.9	54055.3	7439.33	83601.9	70558.7
Q8N3Z0	NA	3159.08	6082.68	4839.66	6646.36	2774.18	NA	1556.65	8326.48	7562.02
Q8N436	4561.94	NA	1953.34	1567.71	3658.39	2549.13	NA	1033.48	2857.51	3569.7
Q8N474	NA	NA	NA	NA	9697.77	NA	NA	NA	NA	10027.5
Q8N475	49950.7	34693.1	16008.9	16913.1	42292	33459.7	23409.1	16672.6	19019.6	41872.6
Q8NBJ4	9833.61	12706.3	10781.3	15332.6	13358.1	12130.3	4680.55	8166.4	19408.1	11927.8
Q8NCC3	NA	NA	NA	NA	NA	NA	NA	NA	NA	NA
Q8NEV9	5208.89	NA	NA	NA	2243.65	714.574	NA	NA	NA	NA
Q8NFT8	NA	NA	NA	NA	NA	467.145	NA	NA	NA	NA
Q8NFZ8	NA	3321.97	1523.01	NA	932.394	4401.78	NA	NA	2811.46	2076.5
Q8NHP8	NA	14448.4	7221.06	11616.4	5521.51	6140.45	13400.1	11865.8	13516.3	12682.1
Q8TER0	2410.7	4407.62	2608.41	2310.33	2386.45	1724.08	NA	NA	2124.45	1498.4
Q8WUA8	NA	979.059	NA	NA	4824.04	NA	NA	NA	NA	2007.11
Q8WXD2	6974.07	6562.98	8741.46	8798.93	6375.22	6819.85	4933.55	4192.95	6365.79	5441.98
Q8WY21	14849.1	2636.44	7492.55	4030.03	2256.89	3597.86	11604.6	3197.09	4155.73	1756.14
Q92484	NA	NA	NA	NA	NA	NA	NA	NA	666.764	NA
Q92520	66012.6	44102.1	18714.1	51539.8	23151.9	33285	42877	24699.6	60985.9	24023.4
Q92626	NA	NA	NA	NA	NA	NA	NA	NA	75480.2	24011.5
Q92673	NA	1	1.34305	227.713	478.812	1	NA	1.04731	1	1
Q92729	NA	NA	NA	NA	NA	NA	NA	NA	NA	NA
Q92743	10358.2	10317.7	44252.7	32939.9	12604.9	11841.1	3723.59	4972.66	8889.66	14074.4
Q92752	NA	NA	NA	NA	NA	NA	NA	NA	NA	NA
Q92765	299699	176047	144191	169976	318466	102371	129979	159328	202390	240196
Q92820	13061.5	7549.98	9566.76	NA	3706.46	4020.8	9114.54	NA	6361.66	3048.84
Q92859	4762.78	5337.54	2238.25	3685.36	3834.82	3906.7	3181.31	NA	4935.34	2809.97
Q92887	16038.1	2257.67	NA	11761.8	6492.99	NA	54915.6	NA	10274.1	NA
Q96A11	NA	NA	NA	NA	NA	4685.49	NA	NA	5321.85	NA
Q96FE5	NA	NA	NA	7339.3	NA	NA	NA	NA	2570.29	NA
Q96FE7	5159.05	2478	5850.61	6602.68	3060.99	4644.19	3483.7	NA	6349.06	2604.27
Q96GW7	NA	465.011	NA	NA	1010.32	1038.65	NA	NA	NA	728.174
Q96HF1	152798	18156.5	12599.2	18310.9	33347.1	27489.6	34135.4	19153	20835	31609.8
Q96JC1	NA	14064.5	33028.5	45512	3281.2	NA	NA	NA	22376.9	NA
Q96JF0	NA	NA	3152.22	3944.26	NA	1449.78	NA	NA	2651.02	NA
Q96JP9	24252.7	34977.3	26110.2	33137.8	15156.6	33714	18860	13652.2	35595.3	17150.2
Q96KG7	NA	NA	NA	NA	NA	3069.78	NA	NA	NA	NA
Q96KN2	11951.3	8677.98	4166.73	4044.73	5880.82	3720.92	6433.26	12042.8	3849.02	4677.63
Q96PD5	69399.1	45742.7	77364	55184	33646.8	37070.7	36620.2	67810.9	70815.8	27620.9
Q96PQ0	NA	4009.57	9632.01	10468.8	2639.92	7015.47	NA	1065.92	13820.5	1541.81
Q96RW7	2362.08	NA	2680.75	3854.19	5387.05	2114.03	NA	NA	7177.23	2966
Q96S96	6154.91	11815.3	21678.6	13272.5	17042.4	11349	12077.1	10178.5	12683.4	14522.8
Q96T91	NA	NA	1882.75	NA	NA	NA	NA	NA	NA	NA
Q99574	17383.3	16023.2	22205.4	21652.9	14961.6	16893.1	17361.3	18588.3	24380.4	14366.5
Q99674	NA	NA	NA	NA	NA	NA	NA	NA	NA	NA
Q99784	8940.98	18251.1	14567.7	18729.6	15598.4	16663.8	NA	11032.3	15692.7	11326.2
Q99941	NA	NA	NA	NA	NA	NA	NA	NA	NA	NA
Q99972	61882.5	40711.3	17749.1	26136.9	NA	37033.7	47840.9	36373.4	28910.4	NA
Q99983	13383	6623.44	13826.2	3003.06	5923.36	13224.4	10486	4988.19	10384.1	3828.75
Q9BQT9	NA	4921.04	NA	4502.53	4945.86	4366.91	NA	NA	5060.27	8876.95
Q9BRK5	6857.99	6789.81	4811	7585.99	7331.14	10955.6	2955.78	3856.95	5332.81	5976.75
Q9BS26	NA	1454.78	NA	NA	2647.7	NA	NA	NA	NA	1205.32
Q9BS40	NA	NA	NA	NA	15504.2	565.506	NA	NA	NA	9236.82
Q9BTY2	20730.9	13677.5	10100.7	67271.4	11981.6	12513.1	16999.8	8212.95	9996.1	73378.8
Q9BU40	10860.3	7062.86	NA	9617.13	16049.9	5654.93	NA	37181.5	23459.5	15994.7
Q9BWV1	NA	NA	NA	NA	NA	NA	NA	NA	NA	NA
Q9BXJ0	7511.52	1244.89	7772.88	2363.22	1422.11	5985	NA	2207.26	2228.16	2284.27
Q9BXP8	21421.4	40978.8	39947.3	32188.8	30854.7	33006.6	22088.4	19950.8	29444.6	30464.3
Q9BY76	NA	NA	NA	NA	1657.95	NA	NA	NA	NA	1239.95
Q9BYJ0	14984.7	8474.9	9022.83	8497.85	10893.5	7794.46	8990.39	13017	8431.2	8636.62
Q9BZM5	NA	NA	NA	NA	225.885	NA	NA	NA	NA	NA
Q9BZV3	12354.7	4770.21	16425.3	19192.8	9606.33	7344.75	3061.65	3336.85	13460.5	8295.6
Q9GZP0	NA	NA	NA	2134.83	2814.78	2051.17	NA	2552.2	2028.62	3460.35
Q9GZX9	1200	NA	19095.9	19878.5	11292.2	7748.39	NA	NA	23319.1	10918.8
Q9GZZ8	NA	19798.6	NA	NA	NA	NA	NA	NA	NA	3828.78
Q9H082	NA	4433.83	NA	NA	7936.27	NA	NA	NA	NA	6981.27
Q9H1B5	NA	NA	NA	NA	NA	NA	NA	NA	NA	NA
Q9H2A7	20639.6	16112.3	14332.6	15185.2	19856.6	22280.6	4612.79	11280.7	12556.4	15615.2
Q9H3G5	5441.77	3615.52	5788.37	3547.97	6947.54	9730.1	NA	2372.03	4318.63	2243.21
Q9H3K6	NA	NA	NA	NA	5563.7	NA	NA	NA	NA	4096.44
Q9H461	NA	NA	NA	NA	NA	1662.09	NA	NA	NA	NA
Q9H4D0	3824.85	5947.75	12172.8	24045	5960.59	12535.3	NA	4973.42	31670.1	12129.2
Q9HAT2	8734.24	8531.12	8873.42	7010.46	7330.43	10389.8	2110.46	6174.39	4886.51	5196.09
Q9HBR0	625.073	1584.22	NA	NA	NA	453.648	946.586	NA	NA	NA
Q9HCB6	96437.9	123014	103246	119176	135386	120645	65928	57504.4	122979	144566
Q9HCQ7	3921.09	7965.49	16358.4	12385	18790.4	3168.11	NA	7822.02	5648.75	17489.5
Q9NPH3	NA	7470.72	12214.8	12893.2	6772.74	9760.29	NA	5457.83	12601.3	6824.64
Q9NQ38	NA	NA	NA	NA	NA	NA	NA	NA	2069.06	NA
Q9NR34	NA	4223.35	1566.53	NA	1748.5	2343.24	1623.94	822.366	1725	7298.56
Q9NRN5	5551.25	25927.8	11832.9	8449.95	12888.6	11360.5	7790.79	6829.32	12232	12197
Q9NRR1	21656.4	8793.03	7024.35	13062.6	15375.7	9595.35	12820.4	5630.37	12025	9148.52
Q9NS15	NA	NA	NA	NA	NA	NA	NA	NA	NA	624.921
Q9NS71	NA	NA	NA	2018.06	1264.16	NA	NA	NA	1670.07	NA
Q9NY97	NA	NA	NA	NA	NA	NA	NA	NA	NA	NA
Q9NZ08	NA	4625.2	NA	3073.93	NA	2310.79	NA	NA	3315.95	740.259
Q9NZP8	4897.74	12987.2	12300.4	6894.28	6595.07	6009.33	8006.99	13014.8	13006	4987.8
Q9UBM4	466406	197759	244795	277890	323168	362211	237453	364963	481806	268622
Q9UBQ6	NA	NA	NA	NA	NA	NA	NA	NA	NA	NA
Q9UBR2	51163	26724.4	24319.8	34702.2	29653.8	31927.6	24493.9	31207.5	24584.9	23475.4
Q9UBX1	2971.53	5809.13	2763.16	2691.12	1718.12	3255.51	1145.13	1497.69	1771.57	1115.27
Q9UFW8	202444	464450	11366.3	18199.9	354823	153404	300198	773136	1.24579e+06	333213
Q9UGM5	14950.2	38309.9	86596.1	54130.4	41099.7	22714.2	37365.5	69318.8	48078.8	34643.1
Q9UHG2	30798.2	31622.8	56533	61002.3	35533.1	31873.2	15431.5	23264.1	47267.6	42387
Q9UHL4	10425.8	11812.7	13523.1	26766.4	7168.1	21091.4	NA	NA	39889.5	5689.56
Q9UJJ9	4213.82	5939	6701.64	6910.77	6397.03	3370.07	1664.06	1714.85	9090.89	5143.42
Q9ULX7	5766.88	NA	NA	NA	764.15	NA	NA	NA	NA	NA
Q9UM22	8528.15	1296.78	15292.4	1882.15	NA	5036.73	NA	1144.6	2095.95	NA
Q9UMX5	NA	NA	NA	NA	827.098	878.003	NA	NA	NA	NA
Q9UNA0	866.909	1289.29	1395.51	16095.1	10787	8260.19	NA	2489.21	3670.73	2244.79
Q9UNW1	4661.16	NA	NA	NA	NA	4128.34	NA	NA	9819.27	4146.38
Q9Y240	NA	3471.63	2835.01	1692.17	4112.55	3149.17	NA	NA	NA	3686.91
Q9Y279	NA	20448.2	7432.1	26654.6	23366.3	15087.3	11516.4	1047.72	23907.3	19134
Q9Y2I2	NA	NA	NA	NA	NA	NA	NA	NA	NA	NA
Q9Y5C1	NA	NA	NA	1289.81	NA	NA	NA	NA	3137.17	NA
Q9Y5W5	45393.1	19029.6	24757.2	33145.7	17881.8	33994.9	9821.81	22265.4	39230.3	17934.2
Q9Y5Y7	NA	8214.13	6834	3644.99	3558.13	3794.62	NA	2228.51	8066.69	4566.2
Q9Y5Z4	NA	NA	NA	NA	NA	NA	NA	NA	NA	NA
Q9Y646	13095.1	24935.4	111515	24620	17328.6	17331.3	10928.7	9592.33	27143.7	44634.5
Q9Y6C2	2865.6	NA	2857.89	1992.67	3138.28	2170.98	NA	NA	3502.61	3460.44
Q9Y6R7	123072	132747	74944.4	100746	119655	122415	56182.6	35778.8	123173	97021

## Sheet: Table S2
Table S2. Differentially expressed proteins (DEPs) between two groups (|log2FC| > 0.58, unpaired two-sided t-test, p value < 0.05).
		A1B	A2B	A4B	A5B	A6B	A1A	A2A	A4A	A5A	A6A	p.normal.distribution	p.variance.homo	p.t.test	p.adjust.BH	Fold.Change
K7ERI9	APOC1	-0.983706	3.64055	-1.67569	3.32491	-0.597128	2.92193	5.50952	4.76846	5.55809	-0.141672	0.134029	0.92441	0.043763	0.898561	2.98148
P00740	F9	-4.98814	-2.67177	-3.20335	-3.68603	-2.61699	-3.00941	0.874034	-1.15905	-3.69485	-1.51377	0.577556	0.268522	0.0417444	0.898561	1.73265
Q86YZ3	HRNR	-3.2659	-1.35465	-1.35751	-1.3968	-2.71972	-2.70276	0.192795	-0.324405	-0.340497	-0.907648	0.453074	0.691378	0.00526304	0.898561	1.20241
P02790	HPX	2.85672	4.82601	7.03183	4.32759	3.44988	4.86876	5.8701	6.94326	5.18719	4.3814	0.716254	0.373322	0.0462029	0.898561	0.951737
Q03591	CFHR1	-0.248213	-0.9043	0.230397	0.0750103	-1.3145	1.16497	0.343213	0.637678	0.438317	-0.165142	0.862292	0.561401	0.0142891	0.898561	0.916128
A0A0C4DH35	IGHV3-35	-0.224894	-0.627759	-0.58524	-0.452473	-0.710933	0.120084	1.27175	0.891187	-0.165223	-0.163046	0.0542884	0.0348108	0.0494709	0.898561	0.911211
P01766	IGHV3-13	-1.13626	-0.0855652	-1.32342	-0.247029	-0.639015	-0.114578	0.552936	0.0968267	0.337003	0.156005	0.395659	0.170147	0.00425065	0.898561	0.891897
Q07507	DPT	-0.558868	-0.69749	-1.11539	-0.844397	-1.01037	0.0427206	0.272404	-0.351659	0.723183	-0.583962	0.465342	0.139417	0.0117472	0.898561	0.865839
P00915	CA1	3.5456	2.95326	-0.658841	1.99436	6.003	2.58706	2.07391	-1.65061	1.71616	5.47469	0.689762	0.927472	0.00641688	0.898561	-0.727234
P42785	PRCP	-0.540815	-1.01276	-0.838256	-1.08515	-0.865343	-1.79008	-1.38213	-2.15863	-1.40072	-1.36851	0.806598	0.347389	0.0269235	0.898561	-0.751551
P68871	HBB	8.01934	7.58183	3.62515	6.05204	11.2486	6.7332	6.15869	2.1901	5.86538	11.0403	0.615143	0.8215	0.0356085	0.898561	-0.907863
A0A0A0MS08	IGHG1	12.3646	11.4505	11.6416	12.0037	11.042	10.0526	10.6627	10.9706	10.9498	9.94654	0.849906	0.941599	0.0155952	0.898561	-1.18404
A0A087WUD8	VEGFA	1.16156	0.529007	0.256768	-0.0512244	0.783279	-0.323117	-1.50934	0.0210885	-1.47692	-1.0148	0.558968	0.473122	0.0108539	0.898561	-1.3965
P03951	F11	3.43976	2.3533	0.650196	0.853147	-0.715042	-1.32255	-0.187161	-0.889451	-0.326502	-1.32246	0.140068	0.0567629	0.0436386	0.898561	-2.1259
A0A1W2PNW4	FLT1	8.57001	8.12421	8.64087	8.70331	7.88379	6.95275	2.36592	7.68069	7.10103	2.38442	0.00145299	0.00209537	0.0417889	0.898561	-3.08747
P35968	KDR	7.52954	7.93923	8.46227	8.4861	8.06874	-2.38484	-2.20866	-0.22646	-3.54045	-0.643362	0.00804306	0.03637	8.48584e-05	0.0477753	-9.89793

## Sheet: Table S3
Table S3. The enrichment analysis of GO biological processes for Differentially expressed proteins (DEPs).
ID	Description	GeneRatio	BgRatio	pvalue	p.adjust	qvalue	geneID	Count
GO:0007597	blood coagulation, intrinsic pathway	3/16	18/18866	4.0522e-07	0.000282033	0.000151424	F9/F11/PRCP	3
GO:0072376	protein activation cascade	3/16	28/18866	1.61845e-06	0.000348643	0.000187187	F9/F11/PRCP	3
GO:0072378	blood coagulation, fibrin clot formation	3/16	28/18866	1.61845e-06	0.000348643	0.000187187	F9/F11/PRCP	3
GO:0060055	angiogenesis involved in wound healing	3/16	30/18866	2.0037e-06	0.000348643	0.000187187	VEGFA/KDR/PRCP	3
GO:0002920	regulation of humoral immune response	4/16	134/18866	4.14483e-06	0.000576961	0.000309772	IGHG1/IGHV3-13/HPX/CFHR1	4
GO:0006898	receptor-mediated endocytosis	5/16	328/18866	5.74966e-06	0.000666961	0.000358093	VEGFA/APOC1/IGHV3-13/HPX/HBB	5
GO:0002455	humoral immune response mediated by circulating immunoglobulin	4/16	155/18866	7.38644e-06	0.000734423	0.000394314	IGHG1/IGHV3-35/IGHV3-13/HPX	4
GO:0038084	vascular endothelial growth factor signaling pathway	3/16	51/18866	1.01666e-05	0.000874228	0.000469375	VEGFA/FLT1/KDR	3
GO:0006959	humoral immune response	5/16	377/18866	1.13047e-05	0.000874228	0.000469375	IGHG1/IGHV3-35/IGHV3-13/HPX/CFHR1	5
GO:0006956	complement activation	4/16	178/18866	1.27611e-05	0.000888172	0.000476862	IGHG1/IGHV3-35/IGHV3-13/CFHR1	4
GO:0035924	cellular response to vascular endothelial growth factor stimulus	3/16	75/18866	3.25583e-05	0.0018689	0.00100341	VEGFA/FLT1/KDR	3
GO:0016064	immunoglobulin mediated immune response	4/16	227/18866	3.31609e-05	0.0018689	0.00100341	IGHG1/IGHV3-35/IGHV3-13/HPX	4
GO:0019724	B cell mediated immunity	4/16	230/18866	3.49075e-05	0.0018689	0.00100341	IGHG1/IGHV3-35/IGHV3-13/HPX	4
GO:0006910	phagocytosis, recognition	3/16	88/18866	5.25565e-05	0.00261281	0.00140282	IGHG1/IGHV3-35/IGHV3-13	3
GO:2001028	positive regulation of endothelial cell chemotaxis	2/16	15/18866	7.0351e-05	0.00315237	0.00169252	VEGFA/KDR	2
GO:0048010	vascular endothelial growth factor receptor signaling pathway	3/16	98/18866	7.24683e-05	0.00315237	0.00169252	VEGFA/FLT1/KDR	3
GO:0030449	regulation of complement activation	3/16	115/18866	0.000116611	0.00468494	0.00251536	IGHG1/IGHV3-13/CFHR1	3
GO:0061042	vascular wound healing	2/16	21/18866	0.000140285	0.00468494	0.00251536	VEGFA/KDR	2
GO:0006911	phagocytosis, engulfment	3/16	126/18866	0.000152858	0.00468494	0.00251536	IGHG1/IGHV3-35/IGHV3-13	3
GO:0007596	blood coagulation	4/16	343/18866	0.000164364	0.00468494	0.00251536	F9/F11/PRCP/HBB	4
GO:0035162	embryonic hemopoiesis	2/16	23/18866	0.000168843	0.00468494	0.00251536	VEGFA/KDR	2
GO:0007599	hemostasis	4/16	348/18866	0.000173757	0.00468494	0.00251536	F9/F11/PRCP/HBB	4
GO:0050817	coagulation	4/16	349/18866	0.000175682	0.00468494	0.00251536	F9/F11/PRCP/HBB	4
GO:0050853	B cell receptor signaling pathway	3/16	135/18866	0.000187436	0.00468494	0.00251536	IGHG1/IGHV3-35/IGHV3-13	3
GO:0099024	plasma membrane invagination	3/16	135/18866	0.000187436	0.00468494	0.00251536	IGHG1/IGHV3-35/IGHV3-13	3
GO:0050927	positive regulation of positive chemotaxis	2/16	25/18866	0.000200011	0.00468494	0.00251536	VEGFA/KDR	2
GO:0051894	positive regulation of focal adhesion assembly	2/16	25/18866	0.000200011	0.00468494	0.00251536	VEGFA/KDR	2
GO:2001026	regulation of endothelial cell chemotaxis	2/16	25/18866	0.000200011	0.00468494	0.00251536	VEGFA/KDR	2
GO:0002449	lymphocyte mediated immunity	4/16	366/18866	0.000210819	0.00468494	0.00251536	IGHG1/IGHV3-35/IGHV3-13/HPX	4
GO:0006958	complement activation, classical pathway	3/16	141/18866	0.000213097	0.00468494	0.00251536	IGHG1/IGHV3-35/IGHV3-13	3
GO:0050926	regulation of positive chemotaxis	2/16	26/18866	0.000216571	0.00468494	0.00251536	VEGFA/KDR	2
GO:0002460	adaptive immune response based on somatic recombination of immune receptors built from immunoglobulin superfamily domains	4/16	370/18866	0.000219775	0.00468494	0.00251536	IGHG1/IGHV3-35/IGHV3-13/HPX	4
GO:0010324	membrane invagination	3/16	143/18866	0.000222131	0.00468494	0.00251536	IGHG1/IGHV3-35/IGHV3-13	3
GO:0018108	peptidyl-tyrosine phosphorylation	4/16	374/18866	0.000229003	0.00468783	0.00251691	VEGFA/FLT1/HPX/KDR	4
GO:0018212	peptidyl-tyrosine modification	4/16	377/18866	0.000236106	0.00469515	0.00252084	VEGFA/FLT1/HPX/KDR	4
GO:0050871	positive regulation of B cell activation	3/16	151/18866	0.000260749	0.00504114	0.0027066	IGHG1/IGHV3-35/IGHV3-13	3
GO:0150117	positive regulation of cell-substrate junction organization	2/16	29/18866	0.000270146	0.00508167	0.00272836	VEGFA/KDR	2
GO:0035767	endothelial cell chemotaxis	2/16	32/18866	0.000329542	0.00593111	0.00318443	VEGFA/KDR	2
GO:0043535	regulation of blood vessel endothelial cell migration	3/16	164/18866	0.000332347	0.00593111	0.00318443	VEGFA/KDR/PRCP	3
GO:0001569	branching involved in blood vessel morphogenesis	2/16	36/18866	0.000417744	0.00726875	0.00390261	VEGFA/KDR	2
GO:0090050	positive regulation of cell migration involved in sprouting angiogenesis	2/16	37/18866	0.000441397	0.00749298	0.004023	VEGFA/KDR	2
GO:0001936	regulation of endothelial cell proliferation	3/16	184/18866	0.000465467	0.00771346	0.00414138	VEGFA/FLT1/KDR	3
GO:0043534	blood vessel endothelial cell migration	3/16	189/18866	0.000503368	0.00814754	0.00437444	VEGFA/KDR/PRCP	3
GO:0038083	peptidyl-tyrosine autophosphorylation	2/16	41/18866	0.000542388	0.00834297	0.00447936	VEGFA/KDR	2
GO:0002697	regulation of immune effector process	4/16	470/18866	0.000545451	0.00834297	0.00447936	IGHG1/IGHV3-13/HPX/CFHR1	4
GO:0050864	regulation of B cell activation	3/16	195/18866	0.000551403	0.00834297	0.00447936	IGHG1/IGHV3-35/IGHV3-13	3
GO:0001935	endothelial cell proliferation	3/16	199/18866	0.000585006	0.00865211	0.00464534	VEGFA/FLT1/KDR	3
GO:0015701	bicarbonate transport	2/16	43/18866	0.000596697	0.00865211	0.00464534	CA1/HBB	2
GO:0045766	positive regulation of angiogenesis	3/16	208/18866	0.000665355	0.00945075	0.00507413	VEGFA/FLT1/KDR	3
GO:0008037	cell recognition	3/16	226/18866	0.000846532	0.0117837	0.00632672	IGHG1/IGHV3-35/IGHV3-13	3
GO:1904018	positive regulation of vasculature development	3/16	235/18866	0.000947808	0.0126724	0.00680384	VEGFA/FLT1/KDR	3
GO:0046777	protein autophosphorylation	3/16	237/18866	0.000971312	0.0126724	0.00680384	VEGFA/FLT1/KDR	3
GO:0001954	positive regulation of cell-matrix adhesion	2/16	55/18866	0.000975476	0.0126724	0.00680384	VEGFA/KDR	2
GO:0010594	regulation of endothelial cell migration	3/16	238/18866	0.000983203	0.0126724	0.00680384	VEGFA/KDR/PRCP	3
GO:0031638	zymogen activation	2/16	58/18866	0.00108422	0.0137204	0.0073665	F9/F11	2
GO:0051893	regulation of focal adhesion assembly	2/16	63/18866	0.00127784	0.015603	0.00837732	VEGFA/KDR	2
GO:0090109	regulation of cell-substrate junction assembly	2/16	63/18866	0.00127784	0.015603	0.00837732	VEGFA/KDR	2
GO:0150116	regulation of cell-substrate junction organization	2/16	66/18866	0.00140138	0.0167479	0.008992	VEGFA/KDR	2
GO:0050918	positive chemotaxis	2/16	67/18866	0.00144379	0.0167479	0.008992	VEGFA/KDR	2
GO:1903672	positive regulation of sprouting angiogenesis	2/16	67/18866	0.00144379	0.0167479	0.008992	VEGFA/KDR	2
GO:0043542	endothelial cell migration	3/16	286/18866	0.00166778	0.0190291	0.0102168	VEGFA/KDR/PRCP	3
GO:0010632	regulation of epithelial cell migration	3/16	301/18866	0.00193016	0.0216676	0.0116334	VEGFA/KDR/PRCP	3
GO:0043536	positive regulation of blood vessel endothelial cell migration	2/16	79/18866	0.002	0.0220953	0.011863	VEGFA/KDR	2
GO:0060326	cell chemotaxis	3/16	311/18866	0.00211868	0.0230406	0.0123706	VEGFA/FLT1/KDR	3
GO:0001570	vasculogenesis	2/16	83/18866	0.00220467	0.0232492	0.0124826	VEGFA/KDR	2
GO:0048041	focal adhesion assembly	2/16	83/18866	0.00220467	0.0232492	0.0124826	VEGFA/KDR	2
GO:0050851	antigen receptor-mediated signaling pathway	3/16	325/18866	0.0024014	0.0245975	0.0132065	IGHG1/IGHV3-35/IGHV3-13	3
GO:0090049	regulation of cell migration involved in sprouting angiogenesis	2/16	87/18866	0.00241886	0.0245975	0.0132065	VEGFA/KDR	2
GO:0042113	B cell activation	3/16	328/18866	0.00246489	0.0245975	0.0132065	IGHG1/IGHV3-35/IGHV3-13	3
GO:0014068	positive regulation of phosphatidylinositol 3-kinase signaling	2/16	88/18866	0.00247389	0.0245975	0.0132065	FLT1/KDR	2
GO:1903725	regulation of phospholipid metabolic process	2/16	95/18866	0.0028756	0.0281786	0.0151292	FLT1/APOC1	2
GO:0042742	defense response to bacterium	3/16	348/18866	0.00291503	0.0281786	0.0151292	IGHG1/IGHV3-35/IGHV3-13	3
GO:0007044	cell-substrate junction assembly	2/16	99/18866	0.00311803	0.0294684	0.0158217	VEGFA/KDR	2
GO:0051251	positive regulation of lymphocyte activation	3/16	357/18866	0.00313313	0.0294684	0.0158217	IGHG1/IGHV3-35/IGHV3-13	3
GO:0060191	regulation of lipase activity	2/16	101/18866	0.00324274	0.029688	0.0159396	FLT1/APOC1	2
GO:0150115	cell-substrate junction organization	2/16	102/18866	0.00330596	0.029688	0.0159396	VEGFA/KDR	2
GO:0010631	epithelial cell migration	3/16	365/18866	0.00333528	0.029688	0.0159396	VEGFA/KDR/PRCP	3
GO:0002042	cell migration involved in sprouting angiogenesis	2/16	103/18866	0.00336976	0.029688	0.0159396	VEGFA/KDR	2
GO:1901890	positive regulation of cell junction assembly	2/16	103/18866	0.00336976	0.029688	0.0159396	VEGFA/KDR	2
GO:0090132	epithelium migration	3/16	368/18866	0.00341312	0.0296942	0.0159429	VEGFA/KDR/PRCP	3
GO:0048259	regulation of receptor-mediated endocytosis	2/16	105/18866	0.00349909	0.0300663	0.0161427	VEGFA/APOC1	2
GO:0090130	tissue migration	3/16	374/18866	0.00357215	0.0303197	0.0162787	VEGFA/KDR/PRCP	3
GO:0006909	phagocytosis	3/16	382/18866	0.00379121	0.0317913	0.0170689	IGHG1/IGHV3-35/IGHV3-13	3
GO:0001938	positive regulation of endothelial cell proliferation	2/16	113/18866	0.00403937	0.0334691	0.0179696	VEGFA/KDR	2
GO:0050678	regulation of epithelial cell proliferation	3/16	395/18866	0.00416452	0.0341001	0.0183084	VEGFA/FLT1/KDR	3
GO:0045446	endothelial cell differentiation	2/16	117/18866	0.00432318	0.0349876	0.0187849	VEGFA/KDR	2
GO:0045765	regulation of angiogenesis	3/16	403/18866	0.00440508	0.0352407	0.0189208	VEGFA/FLT1/KDR	3
GO:0002696	positive regulation of leukocyte activation	3/16	406/18866	0.00449744	0.0355707	0.019098	IGHG1/IGHV3-35/IGHV3-13	3
GO:0010811	positive regulation of cell-substrate adhesion	2/16	122/18866	0.00469065	0.036682	0.0196946	VEGFA/KDR	2
GO:0001952	regulation of cell-matrix adhesion	2/16	125/18866	0.00491787	0.0380315	0.0204192	VEGFA/KDR	2
GO:0050867	positive regulation of cell activation	3/16	421/18866	0.00497705	0.0380662	0.0204379	IGHG1/IGHV3-35/IGHV3-13	3
GO:0014066	regulation of phosphatidylinositol 3-kinase signaling	2/16	127/18866	0.00507213	0.0383718	0.0206019	FLT1/KDR	2
GO:0010595	positive regulation of endothelial cell migration	2/16	132/18866	0.00546752	0.0409182	0.0219691	VEGFA/KDR	2
GO:0003158	endothelium development	2/16	135/18866	0.00571137	0.0422808	0.0227007	VEGFA/KDR	2
GO:1901342	regulation of vasculature development	3/16	444/18866	0.00577108	0.0422808	0.0227007	VEGFA/FLT1/KDR	3
GO:0002433	immune response-regulating cell surface receptor signaling pathway involved in phagocytosis	2/16	139/18866	0.0060442	0.043333	0.0232656	IGHG1/IGHV3-13	2
GO:0038096	Fc-gamma receptor signaling pathway involved in phagocytosis	2/16	139/18866	0.0060442	0.043333	0.0232656	IGHG1/IGHV3-13	2
GO:0050673	epithelial cell proliferation	3/16	453/18866	0.00610148	0.043333	0.0232656	VEGFA/FLT1/KDR	3
GO:0038094	Fc-gamma receptor signaling pathway	2/16	142/18866	0.00629955	0.0442878	0.0237782	IGHG1/IGHV3-13	2
GO:0050921	positive regulation of chemotaxis	2/16	144/18866	0.0064725	0.0450486	0.0241867	VEGFA/KDR	2
GO:0002431	Fc receptor mediated stimulatory signaling pathway	2/16	145/18866	0.00655979	0.0452041	0.0242702	IGHG1/IGHV3-13	2
GO:1903670	regulation of sprouting angiogenesis	2/16	148/18866	0.0068249	0.0465699	0.0250035	VEGFA/KDR	2
GO:0001667	ameboidal-type cell migration	3/16	481/18866	0.00720176	0.0475227	0.0255151	VEGFA/KDR/PRCP	3
GO:0002429	immune response-activating cell surface receptor signaling pathway	3/16	481/18866	0.00720176	0.0475227	0.0255151	IGHG1/IGHV3-35/IGHV3-13	3
GO:0002757	immune response-activating signal transduction	3/16	481/18866	0.00720176	0.0475227	0.0255151	IGHG1/IGHV3-35/IGHV3-13	3
GO:0045834	positive regulation of lipid metabolic process	2/16	153/18866	0.00727748	0.0475227	0.0255151	FLT1/APOC1	2
GO:0014065	phosphatidylinositol 3-kinase signaling	2/16	154/18866	0.0073696	0.0475227	0.0255151	FLT1/KDR	2
GO:0043312	neutrophil degranulation	3/16	487/18866	0.007452	0.0475227	0.0255151	PRCP/HBB/HRNR	3
GO:0048754	branching morphogenesis of an epithelial tube	2/16	155/18866	0.00746225	0.0475227	0.0255151	VEGFA/KDR	2
GO:0008360	regulation of cell shape	2/16	156/18866	0.00755544	0.0475227	0.0255151	VEGFA/KDR	2
GO:0002283	neutrophil activation involved in immune response	3/16	490/18866	0.00757906	0.0475227	0.0255151	PRCP/HBB/HRNR	3
GO:0010749	regulation of nitric oxide mediated signal transduction	1/16	10/18866	0.00845058	0.0494252	0.0265365	VEGFA	1
GO:0015886	heme transport	1/16	10/18866	0.00845058	0.0494252	0.0265365	HPX	1
GO:0034447	very-low-density lipoprotein particle clearance	1/16	10/18866	0.00845058	0.0494252	0.0265365	APOC1	1
GO:0048739	cardiac muscle fiber development	1/16	10/18866	0.00845058	0.0494252	0.0265365	VEGFA	1
GO:0051901	positive regulation of mitochondrial depolarization	1/16	10/18866	0.00845058	0.0494252	0.0265365	KDR	1
GO:0090037	positive regulation of protein kinase C signaling	1/16	10/18866	0.00845058	0.0494252	0.0265365	VEGFA	1
GO:1901725	regulation of histone deacetylase activity	1/16	10/18866	0.00845058	0.0494252	0.0265365	VEGFA	1
GO:2000048	negative regulation of cell-cell adhesion mediated by cadherin	1/16	10/18866	0.00845058	0.0494252	0.0265365	VEGFA	1
GO:0002244	hematopoietic progenitor cell differentiation	2/16	172/18866	0.00911805	0.0528847	0.0283939	FLT1/KDR	2
GO:0048875	chemical homeostasis within a tissue	1/16	11/18866	0.00929195	0.0530098	0.0284611	VEGFA	1
GO:0060947	cardiac vascular smooth muscle cell differentiation	1/16	11/18866	0.00929195	0.0530098	0.0284611	VEGFA	1
GO:0010634	positive regulation of epithelial cell migration	2/16	176/18866	0.00952954	0.0539233	0.0289515	VEGFA/KDR	2
GO:0002551	mast cell chemotaxis	1/16	12/18866	0.0101326	0.0542486	0.0291262	VEGFA	1
GO:0002923	regulation of humoral immune response mediated by circulating immunoglobulin	1/16	12/18866	0.0101326	0.0542486	0.0291262	HPX	1
GO:0033700	phospholipid efflux	1/16	12/18866	0.0101326	0.0542486	0.0291262	APOC1	1
GO:0071679	commissural neuron axon guidance	1/16	12/18866	0.0101326	0.0542486	0.0291262	VEGFA	1
GO:0150065	regulation of deacetylase activity	1/16	12/18866	0.0101326	0.0542486	0.0291262	VEGFA	1
GO:1904181	positive regulation of membrane depolarization	1/16	12/18866	0.0101326	0.0542486	0.0291262	KDR	1
GO:2001214	positive regulation of vasculogenesis	1/16	12/18866	0.0101326	0.0542486	0.0291262	KDR	1
GO:0008217	regulation of blood pressure	2/16	187/18866	0.0107034	0.0564361	0.0303007	PRCP/HBB	2
GO:0061138	morphogenesis of a branching epithelium	2/16	187/18866	0.0107034	0.0564361	0.0303007	VEGFA/KDR	2
GO:0034379	very-low-density lipoprotein particle assembly	1/16	13/18866	0.0109727	0.0565702	0.0303727	APOC1	1
GO:0045602	negative regulation of endothelial cell differentiation	1/16	13/18866	0.0109727	0.0565702	0.0303727	VEGFA	1
GO:0097531	mast cell migration	1/16	13/18866	0.0109727	0.0565702	0.0303727	VEGFA	1
GO:0048015	phosphatidylinositol-mediated signaling	2/16	192/18866	0.0112572	0.0570915	0.0306526	FLT1/KDR	2
GO:0050731	positive regulation of peptidyl-tyrosine phosphorylation	2/16	195/18866	0.0115956	0.0570915	0.0306526	VEGFA/HPX	2
GO:0002040	sprouting angiogenesis	2/16	196/18866	0.0117093	0.0570915	0.0306526	VEGFA/KDR	2
GO:0048017	inositol lipid-mediated signaling	2/16	196/18866	0.0117093	0.0570915	0.0306526	FLT1/KDR	2
GO:0010872	regulation of cholesterol esterification	1/16	14/18866	0.011812	0.0570915	0.0306526	APOC1	1
GO:0050930	induction of positive chemotaxis	1/16	14/18866	0.011812	0.0570915	0.0306526	VEGFA	1
GO:0051917	regulation of fibrinolysis	1/16	14/18866	0.011812	0.0570915	0.0306526	F11	1
GO:1901678	iron coordination entity transport	1/16	14/18866	0.011812	0.0570915	0.0306526	HPX	1
GO:1903726	negative regulation of phospholipid metabolic process	1/16	14/18866	0.011812	0.0570915	0.0306526	APOC1	1
GO:1901888	regulation of cell junction assembly	2/16	200/18866	0.0121694	0.0571747	0.0306972	VEGFA/KDR	2
GO:2000377	regulation of reactive oxygen species metabolic process	2/16	200/18866	0.0121694	0.0571747	0.0306972	PRCP/HBB	2
GO:0001763	morphogenesis of a branching structure	2/16	201/18866	0.0122856	0.0571747	0.0306972	VEGFA/KDR	2
GO:0015671	oxygen transport	1/16	15/18866	0.0126507	0.0571747	0.0306972	HBB	1
GO:0020027	hemoglobin metabolic process	1/16	15/18866	0.0126507	0.0571747	0.0306972	HPX	1
GO:0034638	phosphatidylcholine catabolic process	1/16	15/18866	0.0126507	0.0571747	0.0306972	APOC1	1
GO:0048569	post-embryonic animal organ development	1/16	15/18866	0.0126507	0.0571747	0.0306972	VEGFA	1
GO:0060841	venous blood vessel development	1/16	15/18866	0.0126507	0.0571747	0.0306972	VEGFA	1
GO:1901550	regulation of endothelial cell development	1/16	15/18866	0.0126507	0.0571747	0.0306972	VEGFA	1
GO:1903140	regulation of establishment of endothelial barrier	1/16	15/18866	0.0126507	0.0571747	0.0306972	VEGFA	1
GO:0030100	regulation of endocytosis	2/16	210/18866	0.013354	0.0583116	0.0313076	VEGFA/APOC1	2
GO:0050679	positive regulation of epithelial cell proliferation	2/16	211/18866	0.0134752	0.0583116	0.0313076	VEGFA/KDR	2
GO:0043116	negative regulation of vascular permeability	1/16	16/18866	0.0134887	0.0583116	0.0313076	VEGFA	1
GO:0051770	positive regulation of nitric-oxide synthase biosynthetic process	1/16	16/18866	0.0134887	0.0583116	0.0313076	KDR	1
GO:0061450	trophoblast cell migration	1/16	16/18866	0.0134887	0.0583116	0.0313076	VEGFA	1
GO:1901163	regulation of trophoblast cell migration	1/16	16/18866	0.0134887	0.0583116	0.0313076	VEGFA	1
GO:2001212	regulation of vasculogenesis	1/16	16/18866	0.0134887	0.0583116	0.0313076	KDR	1
GO:0010810	regulation of cell-substrate adhesion	2/16	217/18866	0.0142123	0.0596232	0.0320118	VEGFA/KDR	2
GO:0031065	positive regulation of histone deacetylation	1/16	17/18866	0.0143261	0.0596232	0.0320118	VEGFA	1
GO:0043117	positive regulation of vascular permeability	1/16	17/18866	0.0143261	0.0596232	0.0320118	VEGFA	1
GO:0070293	renal absorption	1/16	17/18866	0.0143261	0.0596232	0.0320118	HBB	1
GO:0090141	positive regulation of mitochondrial fission	1/16	17/18866	0.0143261	0.0596232	0.0320118	KDR	1
GO:0097529	myeloid leukocyte migration	2/16	222/18866	0.0148397	0.0596232	0.0320118	VEGFA/FLT1	2
GO:0016485	protein processing	2/16	223/18866	0.0149666	0.0596232	0.0320118	F9/F11	2
GO:0034375	high-density lipoprotein particle remodeling	1/16	18/18866	0.0151628	0.0596232	0.0320118	APOC1	1
GO:0034433	steroid esterification	1/16	18/18866	0.0151628	0.0596232	0.0320118	APOC1	1
GO:0034434	sterol esterification	1/16	18/18866	0.0151628	0.0596232	0.0320118	APOC1	1
GO:0034435	cholesterol esterification	1/16	18/18866	0.0151628	0.0596232	0.0320118	APOC1	1
GO:0060033	anatomical structure regression	1/16	18/18866	0.0151628	0.0596232	0.0320118	FLT1	1
GO:0060192	negative regulation of lipase activity	1/16	18/18866	0.0151628	0.0596232	0.0320118	APOC1	1
GO:0060977	coronary vasculature morphogenesis	1/16	18/18866	0.0151628	0.0596232	0.0320118	VEGFA	1
GO:0090036	regulation of protein kinase C signaling	1/16	18/18866	0.0151628	0.0596232	0.0320118	VEGFA	1
GO:0090190	positive regulation of branching involved in ureteric bud morphogenesis	1/16	18/18866	0.0151628	0.0596232	0.0320118	VEGFA	1
GO:0050920	regulation of chemotaxis	2/16	229/18866	0.0157382	0.060848	0.0326694	VEGFA/KDR	2
GO:0007160	cell-matrix adhesion	2/16	230/18866	0.0158684	0.060848	0.0326694	VEGFA/KDR	2
GO:0002922	positive regulation of humoral immune response	1/16	19/18866	0.0159988	0.060848	0.0326694	HPX	1
GO:0010985	negative regulation of lipoprotein particle clearance	1/16	19/18866	0.0159988	0.060848	0.0326694	APOC1	1
GO:0060749	mammary gland alveolus development	1/16	19/18866	0.0159988	0.060848	0.0326694	VEGFA	1
GO:0061377	mammary gland lobule development	1/16	19/18866	0.0159988	0.060848	0.0326694	VEGFA	1
GO:0030595	leukocyte chemotaxis	2/16	232/18866	0.0161303	0.0610146	0.0327589	VEGFA/FLT1	2
GO:0003085	negative regulation of systemic arterial blood pressure	1/16	20/18866	0.0168342	0.0613434	0.0329354	PRCP	1
GO:0015669	gas transport	1/16	20/18866	0.0168342	0.0613434	0.0329354	HBB	1
GO:0031290	retinal ganglion cell axon guidance	1/16	20/18866	0.0168342	0.0613434	0.0329354	VEGFA	1
GO:0032793	positive regulation of CREB transcription factor activity	1/16	20/18866	0.0168342	0.0613434	0.0329354	VEGFA	1
GO:0036303	lymph vessel morphogenesis	1/16	20/18866	0.0168342	0.0613434	0.0329354	VEGFA	1
GO:0051767	nitric-oxide synthase biosynthetic process	1/16	20/18866	0.0168342	0.0613434	0.0329354	KDR	1
GO:0051769	regulation of nitric-oxide synthase biosynthetic process	1/16	20/18866	0.0168342	0.0613434	0.0329354	KDR	1
GO:0038093	Fc receptor signaling pathway	2/16	241/18866	0.0173319	0.0627425	0.0336866	IGHG1/IGHV3-13	2
GO:0045717	negative regulation of fatty acid biosynthetic process	1/16	21/18866	0.0176689	0.0627425	0.0336866	APOC1	1
GO:0061213	positive regulation of mesonephros development	1/16	21/18866	0.0176689	0.0627425	0.0336866	VEGFA	1
GO:0090312	positive regulation of protein deacetylation	1/16	21/18866	0.0176689	0.0627425	0.0336866	VEGFA	1
GO:2000047	regulation of cell-cell adhesion mediated by cadherin	1/16	21/18866	0.0176689	0.0627425	0.0336866	VEGFA	1
GO:0035584	calcium-mediated signaling using intracellular calcium source	1/16	22/18866	0.0185029	0.0647137	0.0347449	KDR	1
GO:0051900	regulation of mitochondrial depolarization	1/16	22/18866	0.0185029	0.0647137	0.0347449	KDR	1
GO:0090189	regulation of branching involved in ureteric bud morphogenesis	1/16	22/18866	0.0185029	0.0647137	0.0347449	VEGFA	1
GO:0002052	positive regulation of neuroblast proliferation	1/16	23/18866	0.0193363	0.0662958	0.0355944	VEGFA	1
GO:0031639	plasminogen activation	1/16	23/18866	0.0193363	0.0662958	0.0355944	F11	1
GO:1901522	positive regulation of transcription from RNA polymerase II promoter involved in cellular response to chemical stimulus	1/16	23/18866	0.0193363	0.0662958	0.0355944	VEGFA	1
GO:1903589	positive regulation of blood vessel endothelial cell proliferation involved in sprouting angiogenesis	1/16	23/18866	0.0193363	0.0662958	0.0355944	VEGFA	1
GO:0036003	positive regulation of transcription from RNA polymerase II promoter in response to stress	1/16	24/18866	0.020169	0.0678145	0.0364098	VEGFA	1
GO:0050995	negative regulation of lipid catabolic process	1/16	24/18866	0.020169	0.0678145	0.0364098	APOC1	1
GO:0051004	regulation of lipoprotein lipase activity	1/16	24/18866	0.020169	0.0678145	0.0364098	APOC1	1
GO:0051882	mitochondrial depolarization	1/16	24/18866	0.020169	0.0678145	0.0364098	KDR	1
GO:0050730	regulation of peptidyl-tyrosine phosphorylation	2/16	263/18866	0.0204256	0.0679847	0.0365011	VEGFA/HPX	2
GO:0043406	positive regulation of MAP kinase activity	2/16	264/18866	0.0205715	0.0679847	0.0365011	VEGFA/FLT1	2
GO:0002053	positive regulation of mesenchymal cell proliferation	1/16	25/18866	0.021001	0.0679847	0.0365011	VEGFA	1
GO:0002092	positive regulation of receptor internalization	1/16	25/18866	0.021001	0.0679847	0.0365011	VEGFA	1
GO:0060330	regulation of response to interferon-gamma	1/16	25/18866	0.021001	0.0679847	0.0365011	HPX	1
GO:0060334	regulation of interferon-gamma-mediated signaling pathway	1/16	25/18866	0.021001	0.0679847	0.0365011	HPX	1
GO:0061217	regulation of mesonephros development	1/16	25/18866	0.021001	0.0679847	0.0365011	VEGFA	1
GO:0061436	establishment of skin barrier	1/16	25/18866	0.021001	0.0679847	0.0365011	HRNR	1
GO:0001945	lymph vessel development	1/16	26/18866	0.0218324	0.0697034	0.0374239	VEGFA	1
GO:0042730	fibrinolysis	1/16	26/18866	0.0218324	0.0697034	0.0374239	F11	1
GO:0051873	killing by host of symbiont cells	1/16	26/18866	0.0218324	0.0697034	0.0374239	CFHR1	1
GO:0031954	positive regulation of protein autophosphorylation	1/16	27/18866	0.0226631	0.0716978	0.0384947	VEGFA	1
GO:0090140	regulation of mitochondrial fission	1/16	27/18866	0.0226631	0.0716978	0.0384947	KDR	1
GO:0033561	regulation of water loss via skin	1/16	28/18866	0.0234932	0.0729966	0.0391921	HRNR	1
GO:0044331	cell-cell adhesion mediated by cadherin	1/16	28/18866	0.0234932	0.0729966	0.0391921	VEGFA	1
GO:0051883	killing of cells in other organism involved in symbiotic interaction	1/16	28/18866	0.0234932	0.0729966	0.0391921	CFHR1	1
GO:1905563	negative regulation of vascular endothelial cell proliferation	1/16	28/18866	0.0234932	0.0729966	0.0391921	FLT1	1
GO:0072593	reactive oxygen species metabolic process	2/16	288/18866	0.0242022	0.0739236	0.0396898	PRCP/HBB	2
GO:0007263	nitric oxide mediated signal transduction	1/16	29/18866	0.0243225	0.0739236	0.0396898	VEGFA	1
GO:0019835	cytolysis	1/16	29/18866	0.0243225	0.0739236	0.0396898	CFHR1	1
GO:0031063	regulation of histone deacetylation	1/16	29/18866	0.0243225	0.0739236	0.0396898	VEGFA	1
GO:0048261	negative regulation of receptor-mediated endocytosis	1/16	29/18866	0.0243225	0.0739236	0.0396898	APOC1	1
GO:0051604	protein maturation	2/16	293/18866	0.0249899	0.0754538	0.0405114	F9/F11	2
GO:0032372	negative regulation of sterol transport	1/16	30/18866	0.0251513	0.0754538	0.0405114	APOC1	1
GO:0032375	negative regulation of cholesterol transport	1/16	30/18866	0.0251513	0.0754538	0.0405114	APOC1	1
GO:0034368	protein-lipid complex remodeling	1/16	31/18866	0.0259794	0.0762938	0.0409623	APOC1	1
GO:0034369	plasma lipoprotein particle remodeling	1/16	31/18866	0.0259794	0.0762938	0.0409623	APOC1	1
GO:0034377	plasma lipoprotein particle assembly	1/16	31/18866	0.0259794	0.0762938	0.0409623	APOC1	1
GO:0045940	positive regulation of steroid metabolic process	1/16	31/18866	0.0259794	0.0762938	0.0409623	APOC1	1
GO:1900745	positive regulation of p38MAPK cascade	1/16	31/18866	0.0259794	0.0762938	0.0409623	VEGFA	1
GO:0034367	protein-containing complex remodeling	1/16	32/18866	0.0268068	0.0767799	0.0412233	APOC1	1
GO:0042168	heme metabolic process	1/16	32/18866	0.0268068	0.0767799	0.0412233	HPX	1
GO:0042744	hydrogen peroxide catabolic process	1/16	32/18866	0.0268068	0.0767799	0.0412233	HBB	1
GO:0046475	glycerophospholipid catabolic process	1/16	32/18866	0.0268068	0.0767799	0.0412233	APOC1	1
GO:0048841	regulation of axon extension involved in axon guidance	1/16	32/18866	0.0268068	0.0767799	0.0412233	VEGFA	1
GO:0070528	protein kinase C signaling	1/16	32/18866	0.0268068	0.0767799	0.0412233	VEGFA	1
GO:0010464	regulation of mesenchymal cell proliferation	1/16	33/18866	0.0276335	0.0781827	0.0419765	VEGFA	1
GO:0010984	regulation of lipoprotein particle clearance	1/16	33/18866	0.0276335	0.0781827	0.0419765	APOC1	1
GO:0043552	positive regulation of phosphatidylinositol 3-kinase activity	1/16	33/18866	0.0276335	0.0781827	0.0419765	FLT1	1
GO:0035633	maintenance of blood-brain barrier	1/16	34/18866	0.0284596	0.0795498	0.0427105	VEGFA	1
GO:1902692	regulation of neuroblast proliferation	1/16	34/18866	0.0284596	0.0795498	0.0427105	VEGFA	1
GO:2000352	negative regulation of endothelial cell apoptotic process	1/16	34/18866	0.0284596	0.0795498	0.0427105	KDR	1
GO:0042462	eye photoreceptor cell development	1/16	35/18866	0.0292851	0.0805628	0.0432544	VEGFA	1
GO:0045922	negative regulation of fatty acid metabolic process	1/16	35/18866	0.0292851	0.0805628	0.0432544	APOC1	1
GO:0065005	protein-lipid complex assembly	1/16	35/18866	0.0292851	0.0805628	0.0432544	APOC1	1
GO:0097009	energy homeostasis	1/16	35/18866	0.0292851	0.0805628	0.0432544	PRCP	1
GO:1905332	positive regulation of morphogenesis of an epithelium	1/16	36/18866	0.0301098	0.0825057	0.0442975	VEGFA	1
GO:0048846	axon extension involved in axon guidance	1/16	37/18866	0.030934	0.0834498	0.0448044	VEGFA	1
GO:0071542	dopaminergic neuron differentiation	1/16	37/18866	0.030934	0.0834498	0.0448044	VEGFA	1
GO:0090218	positive regulation of lipid kinase activity	1/16	37/18866	0.030934	0.0834498	0.0448044	FLT1	1
GO:1902284	neuron projection extension involved in neuron projection guidance	1/16	37/18866	0.030934	0.0834498	0.0448044	VEGFA	1
GO:0060562	epithelial tube morphogenesis	2/16	331/18866	0.0313148	0.0841511	0.0451809	VEGFA/KDR	2
GO:0043010	camera-type eye development	2/16	332/18866	0.0314892	0.0842941	0.0452577	VEGFA/FLT1	2
GO:0030224	monocyte differentiation	1/16	38/18866	0.0317574	0.0843632	0.0452948	VEGFA	1
GO:1903131	mononuclear cell differentiation	1/16	38/18866	0.0317574	0.0843632	0.0452948	VEGFA	1
GO:0006778	porphyrin-containing compound metabolic process	1/16	39/18866	0.0325802	0.0858934	0.0461164	HPX	1
GO:0035886	vascular associated smooth muscle cell differentiation	1/16	39/18866	0.0325802	0.0858934	0.0461164	VEGFA	1
GO:0043405	regulation of MAP kinase activity	2/16	342/18866	0.033254	0.0861039	0.0462294	VEGFA/FLT1	2
GO:0002714	positive regulation of B cell mediated immunity	1/16	40/18866	0.0334024	0.0861039	0.0462294	HPX	1
GO:0002891	positive regulation of immunoglobulin mediated immune response	1/16	40/18866	0.0334024	0.0861039	0.0462294	HPX	1
GO:0006730	one-carbon metabolic process	1/16	40/18866	0.0334024	0.0861039	0.0462294	CA1	1
GO:0043902	positive regulation of multi-organism process	1/16	40/18866	0.0334024	0.0861039	0.0462294	VEGFA	1
GO:0090184	positive regulation of kidney development	1/16	40/18866	0.0334024	0.0861039	0.0462294	VEGFA	1
GO:0071902	positive regulation of protein serine/threonine kinase activity	2/16	345/18866	0.033791	0.0867844	0.0465948	VEGFA/FLT1	2
GO:0000266	mitochondrial fission	1/16	42/18866	0.0350447	0.0896733	0.0481458	KDR	1
GO:0045773	positive regulation of axon extension	1/16	43/18866	0.0358649	0.0911022	0.048913	VEGFA	1
GO:2000648	positive regulation of stem cell proliferation	1/16	43/18866	0.0358649	0.0911022	0.048913	VEGFA	1
GO:0031589	cell-substrate adhesion	2/16	359/18866	0.0363428	0.0919804	0.0493845	VEGFA/KDR	2
GO:0010463	mesenchymal cell proliferation	1/16	44/18866	0.0366845	0.0921747	0.0494888	VEGFA	1
GO:1902667	regulation of axon guidance	1/16	44/18866	0.0366845	0.0921747	0.0494888	VEGFA	1
GO:0002639	positive regulation of immunoglobulin production	1/16	45/18866	0.0375034	0.0928909	0.0498733	HPX	1
GO:0043114	regulation of vascular permeability	1/16	45/18866	0.0375034	0.0928909	0.0498733	VEGFA	1
GO:0045429	positive regulation of nitric oxide biosynthetic process	1/16	45/18866	0.0375034	0.0928909	0.0498733	HBB	1
GO:0090311	regulation of protein deacetylation	1/16	45/18866	0.0375034	0.0928909	0.0498733	VEGFA	1
GO:0001754	eye photoreceptor cell differentiation	1/16	46/18866	0.0383216	0.0932581	0.0500705	VEGFA	1
GO:0010863	positive regulation of phospholipase C activity	1/16	46/18866	0.0383216	0.0932581	0.0500705	FLT1	1
GO:0061028	establishment of endothelial barrier	1/16	46/18866	0.0383216	0.0932581	0.0500705	VEGFA	1
GO:1900744	regulation of p38MAPK cascade	1/16	46/18866	0.0383216	0.0932581	0.0500705	VEGFA	1
GO:1904407	positive regulation of nitric oxide metabolic process	1/16	46/18866	0.0383216	0.0932581	0.0500705	HBB	1
GO:0030225	macrophage differentiation	1/16	47/18866	0.0391392	0.093934	0.0504334	VEGFA	1
GO:0032369	negative regulation of lipid transport	1/16	47/18866	0.0391392	0.093934	0.0504334	APOC1	1
GO:0035722	interleukin-12-mediated signaling pathway	1/16	47/18866	0.0391392	0.093934	0.0504334	CA1	1
GO:0045776	negative regulation of blood pressure	1/16	47/18866	0.0391392	0.093934	0.0504334	PRCP	1
GO:0031952	regulation of protein autophosphorylation	1/16	48/18866	0.0399561	0.0942693	0.0506134	VEGFA	1
GO:0042461	photoreceptor cell development	1/16	48/18866	0.0399561	0.0942693	0.0506134	VEGFA	1
GO:0045601	regulation of endothelial cell differentiation	1/16	48/18866	0.0399561	0.0942693	0.0506134	VEGFA	1
GO:1900274	regulation of phospholipase C activity	1/16	48/18866	0.0399561	0.0942693	0.0506134	FLT1	1
GO:1904036	negative regulation of epithelial cell apoptotic process	1/16	48/18866	0.0399561	0.0942693	0.0506134	KDR	1
GO:0003254	regulation of membrane depolarization	1/16	49/18866	0.0407724	0.0942842	0.0506214	KDR	1
GO:0007595	lactation	1/16	49/18866	0.0407724	0.0942842	0.0506214	VEGFA	1
GO:0009395	phospholipid catabolic process	1/16	49/18866	0.0407724	0.0942842	0.0506214	APOC1	1
GO:0071349	cellular response to interleukin-12	1/16	49/18866	0.0407724	0.0942842	0.0506214	CA1	1
GO:0001654	eye development	2/16	384/18866	0.0410816	0.0942842	0.0506214	VEGFA/FLT1	2
GO:0001961	positive regulation of cytokine-mediated signaling pathway	1/16	50/18866	0.041588	0.0942842	0.0506214	HPX	1
GO:0030195	negative regulation of blood coagulation	1/16	50/18866	0.041588	0.0942842	0.0506214	F11	1
GO:0045806	negative regulation of endocytosis	1/16	50/18866	0.041588	0.0942842	0.0506214	APOC1	1
GO:0070671	response to interleukin-12	1/16	50/18866	0.041588	0.0942842	0.0506214	CA1	1
GO:0101023	vascular endothelial cell proliferation	1/16	50/18866	0.041588	0.0942842	0.0506214	FLT1	1
GO:1903727	positive regulation of phospholipid metabolic process	1/16	50/18866	0.041588	0.0942842	0.0506214	FLT1	1
GO:1905562	regulation of vascular endothelial cell proliferation	1/16	50/18866	0.041588	0.0942842	0.0506214	FLT1	1
GO:0150063	visual system development	2/16	388/18866	0.0418609	0.0945912	0.0507863	VEGFA/FLT1	2
GO:0060976	coronary vasculature development	1/16	51/18866	0.042403	0.0945912	0.0507863	VEGFA	1
GO:0071827	plasma lipoprotein particle organization	1/16	51/18866	0.042403	0.0945912	0.0507863	APOC1	1
GO:1900047	negative regulation of hemostasis	1/16	51/18866	0.042403	0.0945912	0.0507863	F11	1
GO:1903587	regulation of blood vessel endothelial cell proliferation involved in sprouting angiogenesis	1/16	51/18866	0.042403	0.0945912	0.0507863	VEGFA	1
GO:0048880	sensory system development	2/16	394/18866	0.0430405	0.0952338	0.0511313	VEGFA/FLT1	2
GO:0038066	p38MAPK cascade	1/16	52/18866	0.0432173	0.0952338	0.0511313	VEGFA	1
GO:0048260	positive regulation of receptor-mediated endocytosis	1/16	52/18866	0.0432173	0.0952338	0.0511313	VEGFA	1
GO:0030198	extracellular matrix organization	2/16	395/18866	0.0432384	0.0952338	0.0511313	KDR/DPT	2
GO:0043062	extracellular structure organization	2/16	396/18866	0.0434366	0.0953686	0.0512036	KDR/DPT	2
GO:0030857	negative regulation of epithelial cell differentiation	1/16	54/18866	0.044844	0.0978415	0.0525313	VEGFA	1
GO:2000179	positive regulation of neural precursor cell proliferation	1/16	54/18866	0.044844	0.0978415	0.0525313	VEGFA	1
GO:0030199	collagen fibril organization	1/16	55/18866	0.0456564	0.0983803	0.0528207	DPT	1
GO:0042304	regulation of fatty acid biosynthetic process	1/16	55/18866	0.0456564	0.0983803	0.0528207	APOC1	1
GO:0050819	negative regulation of coagulation	1/16	55/18866	0.0456564	0.0983803	0.0528207	F11	1
GO:0071825	protein-lipid complex subunit organization	1/16	55/18866	0.0456564	0.0983803	0.0528207	APOC1	1
GO:0002712	regulation of B cell mediated immunity	1/16	56/18866	0.0464681	0.0989046	0.0531021	HPX	1
GO:0002889	regulation of immunoglobulin mediated immune response	1/16	56/18866	0.0464681	0.0989046	0.0531021	HPX	1
GO:0060688	regulation of morphogenesis of a branching structure	1/16	56/18866	0.0464681	0.0989046	0.0531021	VEGFA	1
GO:0090183	regulation of kidney development	1/16	56/18866	0.0464681	0.0989046	0.0531021	VEGFA	1
GO:0001541	ovarian follicle development	1/16	57/18866	0.0472792	0.0994149	0.0533761	VEGFA	1
GO:0002090	regulation of receptor internalization	1/16	57/18866	0.0472792	0.0994149	0.0533761	VEGFA	1
GO:0042743	hydrogen peroxide metabolic process	1/16	57/18866	0.0472792	0.0994149	0.0533761	HBB	1
GO:0060760	positive regulation of response to cytokine stimulus	1/16	57/18866	0.0472792	0.0994149	0.0533761	HPX	1
GO:0002043	blood vessel endothelial cell proliferation involved in sprouting angiogenesis	1/16	58/18866	0.0480896	0.0999116	0.0536428	VEGFA	1
GO:0007566	embryo implantation	1/16	58/18866	0.0480896	0.0999116	0.0536428	VEGFA	1
GO:0043551	regulation of phosphatidylinositol 3-kinase activity	1/16	58/18866	0.0480896	0.0999116	0.0536428	FLT1	1
GO:0051055	negative regulation of lipid biosynthetic process	1/16	58/18866	0.0480896	0.0999116	0.0536428	APOC1	1
GO:0001658	branching involved in ureteric bud morphogenesis	1/16	59/18866	0.0488994	0.100991	0.0542224	VEGFA	1
GO:0048008	platelet-derived growth factor receptor signaling pathway	1/16	59/18866	0.0488994	0.100991	0.0542224	VEGFA	1
GO:0048747	muscle fiber development	1/16	60/18866	0.0497086	0.101756	0.0546333	VEGFA	1
GO:0050994	regulation of lipid catabolic process	1/16	60/18866	0.0497086	0.101756	0.0546333	APOC1	1
GO:1903428	positive regulation of reactive oxygen species biosynthetic process	1/16	60/18866	0.0497086	0.101756	0.0546333	HBB	1
GO:0045785	positive regulation of cell adhesion	2/16	428/18866	0.0499606	0.101972	0.0547493	VEGFA/KDR	2
GO:0033013	tetrapyrrole metabolic process	1/16	61/18866	0.0505171	0.10265	0.055113	HPX	1
GO:0019216	regulation of lipid metabolic process	2/16	431/18866	0.0505899	0.10265	0.055113	FLT1/APOC1	2
GO:0034329	cell junction assembly	2/16	434/18866	0.0512222	0.10265	0.055113	VEGFA/KDR	2
GO:0007405	neuroblast proliferation	1/16	62/18866	0.0513249	0.10265	0.055113	VEGFA	1
GO:0010518	positive regulation of phospholipase activity	1/16	62/18866	0.0513249	0.10265	0.055113	FLT1	1
GO:0070527	platelet aggregation	1/16	62/18866	0.0513249	0.10265	0.055113	HBB	1
GO:2000351	regulation of endothelial cell apoptotic process	1/16	62/18866	0.0513249	0.10265	0.055113	KDR	1
GO:0046530	photoreceptor cell differentiation	1/16	63/18866	0.0521321	0.103966	0.0558194	VEGFA	1
GO:0001885	endothelial cell development	1/16	64/18866	0.0529387	0.104972	0.05636	VEGFA	1
GO:0033344	cholesterol efflux	1/16	64/18866	0.0529387	0.104972	0.05636	APOC1	1
GO:0031640	killing of cells of other organism	1/16	65/18866	0.0537446	0.105667	0.0567331	CFHR1	1
GO:0060675	ureteric bud morphogenesis	1/16	65/18866	0.0537446	0.105667	0.0567331	VEGFA	1
GO:1905953	negative regulation of lipid localization	1/16	65/18866	0.0537446	0.105667	0.0567331	APOC1	1
GO:0072171	mesonephric tubule morphogenesis	1/16	66/18866	0.0545499	0.106793	0.0573376	VEGFA	1
GO:0048568	embryonic organ development	2/16	451/18866	0.0548601	0.106793	0.0573376	VEGFA/KDR	2
GO:0002548	monocyte chemotaxis	1/16	67/18866	0.0553546	0.106793	0.0573376	FLT1	1
GO:0034332	adherens junction organization	1/16	67/18866	0.0553546	0.106793	0.0573376	VEGFA	1
GO:0043550	regulation of lipid kinase activity	1/16	67/18866	0.0553546	0.106793	0.0573376	FLT1	1
GO:0006644	phospholipid metabolic process	2/16	455/18866	0.0557295	0.106793	0.0573376	FLT1/APOC1	2
GO:0019932	second-messenger-mediated signaling	2/16	456/18866	0.0559476	0.106793	0.0573376	VEGFA/KDR	2
GO:0002637	regulation of immunoglobulin production	1/16	68/18866	0.0561586	0.106793	0.0573376	HPX	1
GO:0016239	positive regulation of macroautophagy	1/16	68/18866	0.0561586	0.106793	0.0573376	KDR	1
GO:0034381	plasma lipoprotein particle clearance	1/16	68/18866	0.0561586	0.106793	0.0573376	APOC1	1
GO:0045428	regulation of nitric oxide biosynthetic process	1/16	68/18866	0.0561586	0.106793	0.0573376	HBB	1
GO:0072577	endothelial cell apoptotic process	1/16	68/18866	0.0561586	0.106793	0.0573376	KDR	1
GO:0006879	cellular iron ion homeostasis	1/16	70/18866	0.0577646	0.10925	0.0586569	HPX	1
GO:0032374	regulation of cholesterol transport	1/16	70/18866	0.0577646	0.10925	0.0586569	APOC1	1
GO:0032371	regulation of sterol transport	1/16	71/18866	0.0585667	0.109872	0.0589904	APOC1	1
GO:0042531	positive regulation of tyrosine phosphorylation of STAT protein	1/16	71/18866	0.0585667	0.109872	0.0589904	HPX	1
GO:0050891	multicellular organismal water homeostasis	1/16	71/18866	0.0585667	0.109872	0.0589904	HRNR	1
GO:0042440	pigment metabolic process	1/16	72/18866	0.0593681	0.111076	0.0596369	HPX	1
GO:0051346	negative regulation of hydrolase activity	2/16	473/18866	0.0597032	0.111377	0.0597983	VEGFA/APOC1	2
GO:0010517	regulation of phospholipase activity	1/16	73/18866	0.0601689	0.111377	0.0597983	FLT1	1
GO:0051145	smooth muscle cell differentiation	1/16	73/18866	0.0601689	0.111377	0.0597983	VEGFA	1
GO:0072078	nephron tubule morphogenesis	1/16	73/18866	0.0601689	0.111377	0.0597983	VEGFA	1
GO:0046503	glycerolipid catabolic process	1/16	74/18866	0.0609691	0.112261	0.060273	APOC1	1
GO:0051881	regulation of mitochondrial membrane potential	1/16	74/18866	0.0609691	0.112261	0.060273	KDR	1
GO:0048844	artery morphogenesis	1/16	75/18866	0.0617686	0.113134	0.060742	VEGFA	1
GO:0072088	nephron epithelium morphogenesis	1/16	75/18866	0.0617686	0.113134	0.060742	VEGFA	1
GO:0060193	positive regulation of lipase activity	1/16	76/18866	0.0625675	0.1137	0.0610456	FLT1	1
GO:0071229	cellular response to acid chemical	1/16	76/18866	0.0625675	0.1137	0.0610456	VEGFA	1
GO:0072091	regulation of stem cell proliferation	1/16	76/18866	0.0625675	0.1137	0.0610456	VEGFA	1
GO:0061333	renal tubule morphogenesis	1/16	77/18866	0.0633657	0.114255	0.0613439	VEGFA	1
GO:0061418	regulation of transcription from RNA polymerase II promoter in response to hypoxia	1/16	77/18866	0.0633657	0.114255	0.0613439	VEGFA	1
GO:0072028	nephron morphogenesis	1/16	77/18866	0.0633657	0.114255	0.0613439	VEGFA	1
GO:0043900	regulation of multi-organism process	1/16	78/18866	0.0641633	0.115097	0.0617959	VEGFA	1
GO:0061045	negative regulation of wound healing	1/16	78/18866	0.0641633	0.115097	0.0617959	F11	1
GO:0006809	nitric oxide biosynthetic process	1/16	79/18866	0.0649603	0.115338	0.0619251	HBB	1
GO:0006826	iron ion transport	1/16	79/18866	0.0649603	0.115338	0.0619251	HPX	1
GO:0016575	histone deacetylation	1/16	79/18866	0.0649603	0.115338	0.0619251	VEGFA	1
GO:0030104	water homeostasis	1/16	79/18866	0.0649603	0.115338	0.0619251	HRNR	1
GO:0022604	regulation of cell morphogenesis	2/16	499/18866	0.0656154	0.116159	0.062366	VEGFA/KDR	2
GO:0003151	outflow tract morphogenesis	1/16	80/18866	0.0657566	0.116159	0.062366	VEGFA	1
GO:0001937	negative regulation of endothelial cell proliferation	1/16	81/18866	0.0665523	0.117267	0.0629609	FLT1	1
GO:0030193	regulation of blood coagulation	1/16	82/18866	0.0673474	0.118368	0.0635521	F11	1
GO:0055013	cardiac muscle cell development	1/16	83/18866	0.0681418	0.118864	0.0638183	VEGFA	1
GO:1900046	regulation of hemostasis	1/16	83/18866	0.0681418	0.118864	0.0638183	F11	1
GO:2000243	positive regulation of reproductive process	1/16	83/18866	0.0681418	0.118864	0.0638183	VEGFA	1
GO:0046209	nitric oxide metabolic process	1/16	84/18866	0.0689356	0.119948	0.0644003	HBB	1
GO:0043154	negative regulation of cysteine-type endopeptidase activity involved in apoptotic process	1/16	85/18866	0.0697287	0.120724	0.0648172	VEGFA	1
GO:0110110	positive regulation of animal organ morphogenesis	1/16	85/18866	0.0697287	0.120724	0.0648172	VEGFA	1
GO:0009791	post-embryonic development	1/16	86/18866	0.0705212	0.120894	0.0649081	VEGFA	1
GO:0034109	homotypic cell-cell adhesion	1/16	86/18866	0.0705212	0.120894	0.0649081	HBB	1
GO:0042509	regulation of tyrosine phosphorylation of STAT protein	1/16	86/18866	0.0705212	0.120894	0.0649081	HPX	1
GO:0050772	positive regulation of axonogenesis	1/16	86/18866	0.0705212	0.120894	0.0649081	VEGFA	1
GO:0051781	positive regulation of cell division	1/16	87/18866	0.0713131	0.121354	0.0651555	VEGFA	1
GO:0055072	iron ion homeostasis	1/16	87/18866	0.0713131	0.121354	0.0651555	HPX	1
GO:2001057	reactive nitrogen species metabolic process	1/16	87/18866	0.0713131	0.121354	0.0651555	HBB	1
GO:0046470	phosphatidylcholine metabolic process	1/16	88/18866	0.0721044	0.122104	0.0655578	APOC1	1
GO:0050818	regulation of coagulation	1/16	88/18866	0.0721044	0.122104	0.0655578	F11	1
GO:0007260	tyrosine phosphorylation of STAT protein	1/16	89/18866	0.072895	0.122845	0.0659557	HPX	1
GO:0055006	cardiac cell development	1/16	89/18866	0.072895	0.122845	0.0659557	VEGFA	1
GO:0046427	positive regulation of receptor signaling pathway via JAK-STAT	1/16	90/18866	0.073685	0.123876	0.0665095	HPX	1
GO:0015914	phospholipid transport	1/16	91/18866	0.0744744	0.124005	0.0665787	APOC1	1
GO:0051899	membrane depolarization	1/16	91/18866	0.0744744	0.124005	0.0665787	KDR	1
GO:0060333	interferon-gamma-mediated signaling pathway	1/16	91/18866	0.0744744	0.124005	0.0665787	HPX	1
GO:2000177	regulation of neural precursor cell proliferation	1/16	91/18866	0.0744744	0.124005	0.0665787	VEGFA	1
GO:0031058	positive regulation of histone modification	1/16	92/18866	0.0752631	0.124839	0.0670263	VEGFA	1
GO:0051702	interaction with symbiont	1/16	93/18866	0.0760512	0.124839	0.0670263	CFHR1	1
GO:0072080	nephron tubule development	1/16	93/18866	0.0760512	0.124839	0.0670263	VEGFA	1
GO:1903035	negative regulation of response to wounding	1/16	93/18866	0.0760512	0.124839	0.0670263	F11	1
GO:1904894	positive regulation of receptor signaling pathway via STAT	1/16	93/18866	0.0760512	0.124839	0.0670263	HPX	1
GO:2000117	negative regulation of cysteine-type endopeptidase activity	1/16	93/18866	0.0760512	0.124839	0.0670263	VEGFA	1
GO:0060993	kidney morphogenesis	1/16	94/18866	0.0768387	0.125539	0.0674023	VEGFA	1
GO:1904035	regulation of epithelial cell apoptotic process	1/16	94/18866	0.0768387	0.125539	0.0674023	KDR	1
GO:0003073	regulation of systemic arterial blood pressure	1/16	95/18866	0.0776255	0.125938	0.0676164	PRCP	1
GO:0007589	body fluid secretion	1/16	95/18866	0.0776255	0.125938	0.0676164	VEGFA	1
GO:0061326	renal tubule development	1/16	95/18866	0.0776255	0.125938	0.0676164	VEGFA	1
GO:0002690	positive regulation of leukocyte chemotaxis	1/16	96/18866	0.0784117	0.126918	0.0681424	VEGFA	1
GO:0006476	protein deacetylation	1/16	97/18866	0.0791973	0.127008	0.0681907	VEGFA	1
GO:0030516	regulation of axon extension	1/16	97/18866	0.0791973	0.127008	0.0681907	VEGFA	1
GO:0071674	mononuclear cell migration	1/16	97/18866	0.0791973	0.127008	0.0681907	FLT1	1
GO:0120162	positive regulation of cold-induced thermogenesis	1/16	97/18866	0.0791973	0.127008	0.0681907	VEGFA	1
GO:0001657	ureteric bud development	1/16	98/18866	0.0799823	0.127678	0.0685507	VEGFA	1
GO:0045833	negative regulation of lipid metabolic process	1/16	98/18866	0.0799823	0.127678	0.0685507	APOC1	1
GO:0072163	mesonephric epithelium development	1/16	99/18866	0.0807666	0.128341	0.0689068	VEGFA	1
GO:0072164	mesonephric tubule development	1/16	99/18866	0.0807666	0.128341	0.0689068	VEGFA	1
GO:0002702	positive regulation of production of molecular mediator of immune response	1/16	100/18866	0.0815503	0.128705	0.0691022	HPX	1
GO:0008585	female gonad development	1/16	100/18866	0.0815503	0.128705	0.0691022	VEGFA	1
GO:0045807	positive regulation of endocytosis	1/16	100/18866	0.0815503	0.128705	0.0691022	VEGFA	1
GO:0019217	regulation of fatty acid metabolic process	1/16	101/18866	0.0823334	0.129647	0.0696079	APOC1	1
GO:0060840	artery development	1/16	102/18866	0.0831158	0.130584	0.0701108	VEGFA	1
GO:0001823	mesonephros development	1/16	103/18866	0.0838976	0.13122	0.0704522	VEGFA	1
GO:0098869	cellular oxidant detoxification	1/16	103/18866	0.0838976	0.13122	0.0704522	HBB	1
GO:0002824	positive regulation of adaptive immune response based on somatic recombination of immune receptors built from immunoglobulin superfamily domains	1/16	105/18866	0.0854594	0.132177	0.0709663	HPX	1
GO:0030301	cholesterol transport	1/16	105/18866	0.0854594	0.132177	0.0709663	APOC1	1
GO:0046545	development of primary female sexual characteristics	1/16	105/18866	0.0854594	0.132177	0.0709663	VEGFA	1
GO:0062014	negative regulation of small molecule metabolic process	1/16	105/18866	0.0854594	0.132177	0.0709663	APOC1	1
GO:0097006	regulation of plasma lipoprotein particle levels	1/16	105/18866	0.0854594	0.132177	0.0709663	APOC1	1
GO:0002708	positive regulation of lymphocyte mediated immunity	1/16	106/18866	0.0862394	0.132208	0.070983	HPX	1
GO:0032091	negative regulation of protein binding	1/16	106/18866	0.0862394	0.132208	0.070983	CFHR1	1
GO:1905269	positive regulation of chromatin organization	1/16	106/18866	0.0862394	0.132208	0.070983	VEGFA	1
GO:2000379	positive regulation of reactive oxygen species metabolic process	1/16	106/18866	0.0862394	0.132208	0.070983	HBB	1
GO:0035601	protein deacylation	1/16	107/18866	0.0870187	0.132818	0.0713103	VEGFA	1
GO:1903426	regulation of reactive oxygen species biosynthetic process	1/16	107/18866	0.0870187	0.132818	0.0713103	HBB	1
GO:0033138	positive regulation of peptidyl-serine phosphorylation	1/16	109/18866	0.0885755	0.134604	0.0722691	VEGFA	1
GO:0043618	regulation of transcription from RNA polymerase II promoter in response to stress	1/16	109/18866	0.0885755	0.134604	0.0722691	VEGFA	1
GO:0002821	positive regulation of adaptive immune response	1/16	110/18866	0.0893529	0.134902	0.072429	HPX	1
GO:0006641	triglyceride metabolic process	1/16	110/18866	0.0893529	0.134902	0.072429	APOC1	1
GO:0072009	nephron epithelium development	1/16	110/18866	0.0893529	0.134902	0.072429	VEGFA	1
GO:0002526	acute inflammatory response	1/16	111/18866	0.0901298	0.135195	0.0725864	PRCP	1
GO:0061387	regulation of extent of cell growth	1/16	111/18866	0.0901298	0.135195	0.0725864	VEGFA	1
GO:0098732	macromolecule deacylation	1/16	111/18866	0.0901298	0.135195	0.0725864	VEGFA	1
GO:1990748	cellular detoxification	1/16	114/18866	0.0924566	0.138387	0.0743001	HBB	1
GO:0031623	receptor internalization	1/16	115/18866	0.0932309	0.138948	0.0746015	VEGFA	1
GO:0043620	regulation of DNA-templated transcription in response to stress	1/16	115/18866	0.0932309	0.138948	0.0746015	VEGFA	1
GO:0046916	cellular transition metal ion homeostasis	1/16	116/18866	0.0940046	0.139802	0.0750599	HPX	1
GO:1904019	epithelial cell apoptotic process	1/16	117/18866	0.0947778	0.140651	0.0755159	KDR	1
GO:0015918	sterol transport	1/16	118/18866	0.0955503	0.141496	0.0759694	APOC1	1
GO:0010822	positive regulation of mitochondrion organization	1/16	119/18866	0.0963221	0.142034	0.0762586	KDR	1
GO:0046660	female sex differentiation	1/16	119/18866	0.0963221	0.142034	0.0762586	VEGFA	1
GO:0030218	erythrocyte differentiation	1/16	121/18866	0.097864	0.144003	0.0773155	VEGFA	1
GO:0097237	cellular response to toxic substance	1/16	122/18866	0.0986341	0.14483	0.0777595	HBB	1
GO:0048675	axon extension	1/16	123/18866	0.0994035	0.145652	0.0782011	VEGFA	1
GO:0002688	regulation of leukocyte chemotaxis	1/16	124/18866	0.100172	0.14647	0.0786403	VEGFA	1
GO:0003014	renal system process	1/16	125/18866	0.10094	0.146976	0.0789118	HBB	1
GO:0048593	camera-type eye morphogenesis	1/16	125/18866	0.10094	0.146976	0.0789118	VEGFA	1
GO:0055007	cardiac muscle cell differentiation	1/16	126/18866	0.101708	0.147785	0.0793459	VEGFA	1
GO:0072089	stem cell proliferation	1/16	128/18866	0.103241	0.149389	0.0802072	VEGFA	1
GO:1903409	reactive oxygen species biosynthetic process	1/16	128/18866	0.103241	0.149389	0.0802072	HBB	1
GO:0000041	transition metal ion transport	1/16	129/18866	0.104007	0.149564	0.0803012	HPX	1
GO:0002576	platelet degranulation	1/16	129/18866	0.104007	0.149564	0.0803012	VEGFA	1
GO:0034101	erythrocyte homeostasis	1/16	129/18866	0.104007	0.149564	0.0803012	VEGFA	1
GO:0010508	positive regulation of autophagy	1/16	131/18866	0.105537	0.151139	0.0811469	KDR	1
GO:0019218	regulation of steroid metabolic process	1/16	131/18866	0.105537	0.151139	0.0811469	APOC1	1
GO:0001101	response to acid chemical	1/16	132/18866	0.106301	0.15192	0.0815664	VEGFA	1
GO:0007498	mesoderm development	1/16	134/18866	0.107826	0.153785	0.0825677	VEGFA	1
GO:0015748	organophosphate ester transport	1/16	135/18866	0.108589	0.153926	0.0826432	APOC1	1
GO:0032368	regulation of lipid transport	1/16	135/18866	0.108589	0.153926	0.0826432	APOC1	1
GO:0042157	lipoprotein metabolic process	1/16	135/18866	0.108589	0.153926	0.0826432	APOC1	1
GO:0002705	positive regulation of leukocyte mediated immunity	1/16	138/18866	0.110871	0.155577	0.0835297	HPX	1
GO:0006638	neutral lipid metabolic process	1/16	138/18866	0.110871	0.155577	0.0835297	APOC1	1
GO:0006639	acylglycerol metabolic process	1/16	138/18866	0.110871	0.155577	0.0835297	APOC1	1
GO:0055076	transition metal ion homeostasis	1/16	138/18866	0.110871	0.155577	0.0835297	HPX	1
GO:0098754	detoxification	1/16	138/18866	0.110871	0.155577	0.0835297	HBB	1
GO:0002687	positive regulation of leukocyte migration	1/16	142/18866	0.113906	0.158557	0.0851296	VEGFA	1
GO:0030879	mammary gland development	1/16	142/18866	0.113906	0.158557	0.0851296	VEGFA	1
GO:0046425	regulation of receptor signaling pathway via JAK-STAT	1/16	142/18866	0.113906	0.158557	0.0851296	HPX	1
GO:0072073	kidney epithelium development	1/16	142/18866	0.113906	0.158557	0.0851296	VEGFA	1
GO:0072006	nephron development	1/16	143/18866	0.114663	0.159073	0.0854069	VEGFA	1
GO:0002700	regulation of production of molecular mediator of immune response	1/16	144/18866	0.11542	0.159073	0.0854069	HPX	1
GO:0046434	organophosphate catabolic process	1/16	144/18866	0.11542	0.159073	0.0854069	APOC1	1
GO:0106106	cold-induced thermogenesis	1/16	144/18866	0.11542	0.159073	0.0854069	VEGFA	1
GO:0120161	regulation of cold-induced thermogenesis	1/16	144/18866	0.11542	0.159073	0.0854069	VEGFA	1
GO:0033135	regulation of peptidyl-serine phosphorylation	1/16	145/18866	0.116176	0.159799	0.0857964	VEGFA	1
GO:0042542	response to hydrogen peroxide	1/16	146/18866	0.116931	0.160521	0.0861839	HBB	1
GO:0031056	regulation of histone modification	1/16	149/18866	0.119193	0.163304	0.0876785	VEGFA	1
GO:0035148	tube formation	1/16	150/18866	0.119946	0.164013	0.088059	VEGFA	1
GO:0061041	regulation of wound healing	1/16	151/18866	0.120699	0.164396	0.0882646	F11	1
GO:1904892	regulation of receptor signaling pathway via STAT	1/16	151/18866	0.120699	0.164396	0.0882646	HPX	1
GO:0002822	regulation of adaptive immune response based on somatic recombination of immune receptors built from immunoglobulin superfamily domains	1/16	153/18866	0.122202	0.165794	0.0890152	HPX	1
GO:0008203	cholesterol metabolic process	1/16	153/18866	0.122202	0.165794	0.0890152	APOC1	1
GO:0002262	myeloid cell homeostasis	1/16	154/18866	0.122952	0.165842	0.0890412	VEGFA	1
GO:0002706	regulation of lymphocyte mediated immunity	1/16	154/18866	0.122952	0.165842	0.0890412	HPX	1
GO:0061351	neural precursor cell proliferation	1/16	154/18866	0.122952	0.165842	0.0890412	VEGFA	1
GO:1990845	adaptive thermogenesis	1/16	155/18866	0.123702	0.166531	0.089411	VEGFA	1
GO:0048592	eye morphogenesis	1/16	156/18866	0.124451	0.167217	0.089779	VEGFA	1
GO:0010770	positive regulation of cell morphogenesis involved in differentiation	1/16	157/18866	0.1252	0.167898	0.0901451	VEGFA	1
GO:0030168	platelet activation	1/16	158/18866	0.125948	0.168253	0.0903356	HBB	1
GO:0035051	cardiocyte differentiation	1/16	158/18866	0.125948	0.168253	0.0903356	VEGFA	1
GO:1902652	secondary alcohol metabolic process	1/16	162/18866	0.128935	0.171913	0.0923005	APOC1	1
GO:0001764	neuron migration	1/16	164/18866	0.130424	0.173236	0.0930106	VEGFA	1
GO:0007259	receptor signaling pathway via JAK-STAT	1/16	164/18866	0.130424	0.173236	0.0930106	HPX	1
GO:0002819	regulation of adaptive immune response	1/16	168/18866	0.133397	0.176405	0.0947125	HPX	1
GO:0016125	sterol metabolic process	1/16	169/18866	0.134138	0.176405	0.0947125	APOC1	1
GO:0038095	Fc-epsilon receptor signaling pathway	1/16	169/18866	0.134138	0.176405	0.0947125	IGHV3-13	1
GO:0051100	negative regulation of binding	1/16	169/18866	0.134138	0.176405	0.0947125	CFHR1	1
GO:0055002	striated muscle cell development	1/16	169/18866	0.134138	0.176405	0.0947125	VEGFA	1
GO:0032874	positive regulation of stress-activated MAPK cascade	1/16	170/18866	0.134879	0.176405	0.0947125	VEGFA	1
GO:2000241	regulation of reproductive process	1/16	170/18866	0.134879	0.176405	0.0947125	VEGFA	1
GO:0030307	positive regulation of cell growth	1/16	171/18866	0.13562	0.176405	0.0947125	VEGFA	1
GO:0030856	regulation of epithelial cell differentiation	1/16	171/18866	0.13562	0.176405	0.0947125	VEGFA	1
GO:0051302	regulation of cell division	1/16	171/18866	0.13562	0.176405	0.0947125	VEGFA	1
GO:1905952	regulation of lipid localization	1/16	171/18866	0.13562	0.176405	0.0947125	APOC1	1
GO:0001906	cell killing	1/16	172/18866	0.136359	0.176405	0.0947125	CFHR1	1
GO:0070304	positive regulation of stress-activated protein kinase signaling cascade	1/16	172/18866	0.136359	0.176405	0.0947125	VEGFA	1
GO:1990138	neuron projection extension	1/16	172/18866	0.136359	0.176405	0.0947125	VEGFA	1
GO:0006633	fatty acid biosynthetic process	1/16	173/18866	0.137098	0.177033	0.0950492	APOC1	1
GO:0001659	temperature homeostasis	1/16	174/18866	0.137837	0.177328	0.095208	VEGFA	1
GO:0097696	receptor signaling pathway via STAT	1/16	174/18866	0.137837	0.177328	0.095208	HPX	1
GO:0050680	negative regulation of epithelial cell proliferation	1/16	175/18866	0.138575	0.177949	0.0955412	FLT1	1
GO:0016241	regulation of macroautophagy	1/16	176/18866	0.139312	0.178566	0.0958727	KDR	1
GO:0030324	lung development	1/16	177/18866	0.140049	0.179181	0.0962026	VEGFA	1
GO:0048469	cell maturation	1/16	179/18866	0.141521	0.180732	0.0970352	VEGFA	1
GO:0008361	regulation of cell size	1/16	181/18866	0.142991	0.181609	0.0975061	VEGFA	1
GO:0030323	respiratory tube development	1/16	181/18866	0.142991	0.181609	0.0975061	VEGFA	1
GO:1905330	regulation of morphogenesis of an epithelium	1/16	181/18866	0.142991	0.181609	0.0975061	VEGFA	1
GO:0071346	cellular response to interferon-gamma	1/16	182/18866	0.143724	0.181813	0.0976159	HPX	1
GO:2001252	positive regulation of chromosome organization	1/16	182/18866	0.143724	0.181813	0.0976159	VEGFA	1
GO:0001959	regulation of cytokine-mediated signaling pathway	1/16	183/18866	0.144458	0.181813	0.0976159	HPX	1
GO:0055001	muscle cell development	1/16	183/18866	0.144458	0.181813	0.0976159	VEGFA	1
GO:1903034	regulation of response to wounding	1/16	183/18866	0.144458	0.181813	0.0976159	F11	1
GO:0050770	regulation of axonogenesis	1/16	186/18866	0.146654	0.184244	0.0989211	VEGFA	1
GO:0048639	positive regulation of developmental growth	1/16	187/18866	0.147385	0.184829	0.099235	VEGFA	1
GO:0010565	regulation of cellular ketone metabolic process	1/16	189/18866	0.148845	0.186324	0.100038	APOC1	1
GO:0003018	vascular process in circulatory system	1/16	190/18866	0.149574	0.186901	0.100347	VEGFA	1
GO:0010821	regulation of mitochondrion organization	1/16	191/18866	0.150303	0.187139	0.100475	KDR	1
GO:0022408	negative regulation of cell-cell adhesion	1/16	191/18866	0.150303	0.187139	0.100475	VEGFA	1
GO:1902275	regulation of chromatin organization	1/16	195/18866	0.153211	0.19042	0.102237	VEGFA	1
GO:0007565	female pregnancy	1/16	196/18866	0.153937	0.190641	0.102355	VEGFA	1
GO:0060759	regulation of response to cytokine stimulus	1/16	196/18866	0.153937	0.190641	0.102355	HPX	1
GO:0043112	receptor metabolic process	1/16	198/18866	0.155386	0.192094	0.103136	VEGFA	1
GO:0009755	hormone-mediated signaling pathway	1/16	200/18866	0.156834	0.193539	0.103912	PRCP	1
GO:0034341	response to interferon-gamma	1/16	202/18866	0.158279	0.194977	0.104684	HPX	1
GO:0060541	respiratory system development	1/16	204/18866	0.159721	0.196406	0.105451	VEGFA	1
GO:0006888	endoplasmic reticulum to Golgi vesicle-mediated transport	1/16	206/18866	0.161161	0.197828	0.106214	F9	1
GO:0046890	regulation of lipid biosynthetic process	1/16	207/18866	0.161881	0.198361	0.1065	APOC1	1
GO:0071456	cellular response to hypoxia	1/16	208/18866	0.162599	0.198891	0.106785	VEGFA	1
GO:0002377	immunoglobulin production	1/16	210/18866	0.164035	0.199595	0.107163	HPX	1
GO:0002573	myeloid leukocyte differentiation	1/16	210/18866	0.164035	0.199595	0.107163	VEGFA	1
GO:0045216	cell-cell junction organization	1/16	210/18866	0.164035	0.199595	0.107163	VEGFA	1
GO:0002703	regulation of leukocyte mediated immunity	1/16	211/18866	0.164752	0.199769	0.107256	HPX	1
GO:0043393	regulation of protein binding	1/16	211/18866	0.164752	0.199769	0.107256	CFHR1	1
GO:0002685	regulation of leukocyte migration	1/16	212/18866	0.165468	0.200289	0.107535	VEGFA	1
GO:0045089	positive regulation of innate immune response	1/16	213/18866	0.166184	0.200806	0.107813	HPX	1
GO:0043281	regulation of cysteine-type endopeptidase activity involved in apoptotic process	1/16	215/18866	0.167614	0.201833	0.108364	VEGFA	1
GO:0070374	positive regulation of ERK1 and ERK2 cascade	1/16	215/18866	0.167614	0.201833	0.108364	KDR	1
GO:0036294	cellular response to decreased oxygen levels	1/16	218/18866	0.169754	0.204057	0.109559	VEGFA	1
GO:0002064	epithelial cell development	1/16	221/18866	0.17189	0.206268	0.110746	VEGFA	1
GO:0019722	calcium-mediated signaling	1/16	222/18866	0.1726	0.206764	0.111012	KDR	1
GO:0002699	positive regulation of immune effector process	1/16	223/18866	0.17331	0.206902	0.111086	HPX	1
GO:0008406	gonad development	1/16	223/18866	0.17331	0.206902	0.111086	VEGFA	1
GO:0031424	keratinization	1/16	225/18866	0.174729	0.208238	0.111804	HRNR	1
GO:0044706	multi-multicellular organism process	1/16	226/18866	0.175437	0.208725	0.112065	VEGFA	1
GO:0045137	development of primary sexual characteristics	1/16	229/18866	0.177559	0.210889	0.113227	VEGFA	1
GO:0048738	cardiac muscle tissue development	1/16	231/18866	0.17897	0.212203	0.113933	VEGFA	1
GO:0000302	response to reactive oxygen species	1/16	235/18866	0.181787	0.214447	0.115137	HBB	1
GO:0071453	cellular response to oxygen levels	1/16	235/18866	0.181787	0.214447	0.115137	VEGFA	1
GO:0071695	anatomical structure maturation	1/16	235/18866	0.181787	0.214447	0.115137	VEGFA	1
GO:0044242	cellular lipid catabolic process	1/16	236/18866	0.182489	0.214548	0.115192	APOC1	1
GO:0060560	developmental growth involved in morphogenesis	1/16	236/18866	0.182489	0.214548	0.115192	VEGFA	1
GO:0032872	regulation of stress-activated MAPK cascade	1/16	237/18866	0.183192	0.214649	0.115245	VEGFA	1
GO:0048588	developmental cell growth	1/16	237/18866	0.183192	0.214649	0.115245	VEGFA	1
GO:2000116	regulation of cysteine-type endopeptidase activity	1/16	239/18866	0.184594	0.215928	0.115933	VEGFA	1
GO:0070302	regulation of stress-activated protein kinase signaling cascade	1/16	240/18866	0.185294	0.216384	0.116177	VEGFA	1
GO:0042593	glucose homeostasis	1/16	245/18866	0.188788	0.220095	0.118169	PRCP	1
GO:0033500	carbohydrate homeostasis	1/16	246/18866	0.189485	0.22017	0.11821	PRCP	1
GO:0072330	monocarboxylic acid biosynthetic process	1/16	246/18866	0.189485	0.22017	0.11821	APOC1	1
GO:0009636	response to toxic substance	1/16	250/18866	0.192268	0.22303	0.119746	HBB	1
GO:0002833	positive regulation of response to biotic stimulus	1/16	251/18866	0.192962	0.223463	0.119978	HPX	1
GO:2000027	regulation of animal organ morphogenesis	1/16	254/18866	0.195041	0.225496	0.121069	VEGFA	1
GO:0048872	homeostasis of number of cells	1/16	256/18866	0.196425	0.226719	0.121726	VEGFA	1
GO:0031334	positive regulation of protein-containing complex assembly	1/16	257/18866	0.197115	0.22714	0.121952	VEGFA	1
GO:0003007	heart morphogenesis	1/16	258/18866	0.197806	0.227183	0.121975	VEGFA	1
GO:0010951	negative regulation of endopeptidase activity	1/16	258/18866	0.197806	0.227183	0.121975	VEGFA	1
GO:0042180	cellular ketone metabolic process	1/16	260/18866	0.199185	0.22839	0.122623	APOC1	1
GO:0001894	tissue homeostasis	1/16	261/18866	0.199873	0.228802	0.122845	VEGFA	1
GO:0030522	intracellular receptor signaling pathway	1/16	265/18866	0.202622	0.231189	0.124126	PRCP	1
GO:0031330	negative regulation of cellular catabolic process	1/16	265/18866	0.202622	0.231189	0.124126	APOC1	1
GO:0015850	organic hydroxy compound transport	1/16	268/18866	0.204678	0.233152	0.12518	APOC1	1
GO:0090596	sensory organ morphogenesis	1/16	269/18866	0.205363	0.23355	0.125393	VEGFA	1
GO:0051091	positive regulation of DNA-binding transcription factor activity	1/16	270/18866	0.206046	0.233945	0.125606	VEGFA	1
GO:0030258	lipid modification	1/16	271/18866	0.206729	0.234338	0.125817	APOC1	1
GO:0010466	negative regulation of peptidase activity	1/16	272/18866	0.207412	0.23473	0.126027	VEGFA	1
GO:0045927	positive regulation of growth	1/16	274/18866	0.208775	0.235889	0.126649	VEGFA	1
GO:0043491	protein kinase B signaling	1/16	278/18866	0.211496	0.238576	0.128092	KDR	1
GO:0007548	sex differentiation	1/16	280/18866	0.212853	0.239718	0.128705	VEGFA	1
GO:0001822	kidney development	1/16	283/18866	0.214884	0.241614	0.129723	VEGFA	1
GO:0007411	axon guidance	1/16	284/18866	0.21556	0.241983	0.129922	VEGFA	1
GO:0097485	neuron projection guidance	1/16	285/18866	0.216235	0.242351	0.130119	VEGFA	1
GO:0051403	stress-activated MAPK cascade	1/16	286/18866	0.21691	0.242716	0.130315	VEGFA	1
GO:0021700	developmental maturation	1/16	287/18866	0.217585	0.24308	0.13051	VEGFA	1
GO:0010976	positive regulation of neuron projection development	1/16	290/18866	0.219604	0.244943	0.131511	VEGFA	1
GO:0072001	renal system development	1/16	292/18866	0.220948	0.246048	0.132104	VEGFA	1
GO:0051146	striated muscle cell differentiation	1/16	295/18866	0.22296	0.247891	0.133094	VEGFA	1
GO:0031098	stress-activated protein kinase signaling cascade	1/16	300/18866	0.226302	0.251206	0.134873	VEGFA	1
GO:0007162	negative regulation of cell adhesion	1/16	301/18866	0.226969	0.251545	0.135055	VEGFA	1
GO:0002440	production of molecular mediator of immune response	1/16	306/18866	0.230294	0.254017	0.136382	HPX	1
GO:0030216	keratinocyte differentiation	1/16	306/18866	0.230294	0.254017	0.136382	HRNR	1
GO:0070372	regulation of ERK1 and ERK2 cascade	1/16	306/18866	0.230294	0.254017	0.136382	KDR	1
GO:0045088	regulation of innate immune response	1/16	307/18866	0.230958	0.254346	0.136559	HPX	1
GO:0010769	regulation of cell morphogenesis involved in differentiation	1/16	310/18866	0.232945	0.255323	0.137083	VEGFA	1
GO:0016236	macroautophagy	1/16	310/18866	0.232945	0.255323	0.137083	KDR	1
GO:0018105	peptidyl-serine phosphorylation	1/16	310/18866	0.232945	0.255323	0.137083	VEGFA	1
GO:0009895	negative regulation of catabolic process	1/16	323/18866	0.241502	0.264285	0.141895	APOC1	1
GO:0070371	ERK1 and ERK2 cascade	1/16	325/18866	0.24281	0.2653	0.14244	KDR	1
GO:0001655	urogenital system development	1/16	330/18866	0.246072	0.268442	0.144127	VEGFA	1
GO:0032147	activation of protein kinase activity	1/16	331/18866	0.246723	0.268731	0.144282	VEGFA	1
GO:0008202	steroid metabolic process	1/16	332/18866	0.247373	0.269018	0.144437	APOC1	1
GO:0018209	peptidyl-serine modification	1/16	333/18866	0.248023	0.269304	0.14459	VEGFA	1
GO:0006650	glycerophospholipid metabolic process	1/16	343/18866	0.254491	0.27504	0.14767	APOC1	1
GO:0010721	negative regulation of cell development	1/16	343/18866	0.254491	0.27504	0.14767	VEGFA	1
GO:0016042	lipid catabolic process	1/16	343/18866	0.254491	0.27504	0.14767	APOC1	1
GO:0010506	regulation of autophagy	1/16	347/18866	0.257064	0.27739	0.148931	KDR	1
GO:0048638	regulation of developmental growth	1/16	353/18866	0.260907	0.281102	0.150924	VEGFA	1
GO:0033044	regulation of chromosome organization	1/16	356/18866	0.262822	0.282727	0.151797	VEGFA	1
GO:0001666	response to hypoxia	1/16	359/18866	0.264732	0.284342	0.152664	VEGFA	1
GO:0009913	epidermal cell differentiation	1/16	365/18866	0.268539	0.287986	0.15462	HRNR	1
GO:0046394	carboxylic acid biosynthetic process	1/16	367/18866	0.269803	0.288453	0.154871	APOC1	1
GO:0051098	regulation of binding	1/16	367/18866	0.269803	0.288453	0.154871	CFHR1	1
GO:0016053	organic acid biosynthetic process	1/16	368/18866	0.270435	0.288685	0.154996	APOC1	1
GO:0045861	negative regulation of proteolysis	1/16	369/18866	0.271066	0.288915	0.155119	VEGFA	1
GO:0036293	response to decreased oxygen levels	1/16	371/18866	0.272326	0.289815	0.155603	VEGFA	1
GO:0048193	Golgi vesicle transport	1/16	374/18866	0.274213	0.291378	0.156442	F9	1
GO:0045666	positive regulation of neuron differentiation	1/16	380/18866	0.277974	0.294923	0.158345	VEGFA	1
GO:0001701	in utero embryonic development	1/16	383/18866	0.279847	0.296008	0.158928	VEGFA	1
GO:0032535	regulation of cellular component size	1/16	383/18866	0.279847	0.296008	0.158928	VEGFA	1
GO:0006066	alcohol metabolic process	1/16	385/18866	0.281093	0.296426	0.159152	APOC1	1
GO:0031349	positive regulation of defense response	1/16	385/18866	0.281093	0.296426	0.159152	HPX	1
GO:0014706	striated muscle tissue development	1/16	389/18866	0.28358	0.298346	0.160183	VEGFA	1
GO:0031331	positive regulation of cellular catabolic process	1/16	390/18866	0.2842	0.298346	0.160183	KDR	1
GO:0042692	muscle cell differentiation	1/16	390/18866	0.2842	0.298346	0.160183	VEGFA	1
GO:0006869	lipid transport	1/16	393/18866	0.286058	0.299844	0.160987	APOC1	1
GO:0031346	positive regulation of cell projection organization	1/16	394/18866	0.286677	0.30004	0.161092	VEGFA	1
GO:0006631	fatty acid metabolic process	1/16	396/18866	0.287912	0.30043	0.161301	APOC1	1
GO:0070482	response to oxygen levels	1/16	396/18866	0.287912	0.30043	0.161301	VEGFA	1
GO:0002831	regulation of response to biotic stimulus	1/16	409/18866	0.295892	0.307834	0.165277	HPX	1
GO:0060537	muscle tissue development	1/16	409/18866	0.295892	0.307834	0.165277	VEGFA	1
GO:0001558	regulation of cell growth	1/16	420/18866	0.302579	0.314321	0.16876	VEGFA	1
GO:0043588	skin development	1/16	425/18866	0.305599	0.316985	0.17019	HRNR	1
GO:0030099	myeloid cell differentiation	1/16	431/18866	0.309206	0.320249	0.171943	VEGFA	1
GO:0032102	negative regulation of response to external stimulus	1/16	433/18866	0.310405	0.320679	0.172173	F11	1
GO:0046486	glycerolipid metabolic process	1/16	434/18866	0.311003	0.320679	0.172173	APOC1	1
GO:0052548	regulation of endopeptidase activity	1/16	434/18866	0.311003	0.320679	0.172173	VEGFA	1
GO:0022407	regulation of cell-cell adhesion	1/16	439/18866	0.313989	0.323279	0.173569	VEGFA	1
GO:0010876	lipid localization	1/16	440/18866	0.314585	0.323414	0.173642	APOC1	1
GO:0042391	regulation of membrane potential	1/16	443/18866	0.316369	0.323813	0.173856	KDR	1
GO:0048608	reproductive structure development	1/16	443/18866	0.316369	0.323813	0.173856	VEGFA	1
GO:0048732	gland development	1/16	443/18866	0.316369	0.323813	0.173856	VEGFA	1
GO:0061458	reproductive system development	1/16	447/18866	0.318741	0.325761	0.174902	VEGFA	1
GO:0043254	regulation of protein-containing complex assembly	1/16	449/18866	0.319924	0.326491	0.175294	VEGFA	1
GO:0009896	positive regulation of catabolic process	1/16	454/18866	0.322873	0.329019	0.176651	KDR	1
GO:0051090	regulation of DNA-binding transcription factor activity	1/16	455/18866	0.323462	0.329136	0.176714	VEGFA	1
GO:0062012	regulation of small molecule metabolic process	1/16	456/18866	0.32405	0.329253	0.176777	APOC1	1
GO:0006979	response to oxidative stress	1/16	458/18866	0.325224	0.329965	0.177159	HBB	1
GO:0052547	regulation of peptidase activity	1/16	466/18866	0.329903	0.334225	0.179446	VEGFA	1
GO:0016570	histone modification	1/16	468/18866	0.331068	0.334917	0.179818	VEGFA	1
GO:0060249	anatomical structure homeostasis	1/16	469/18866	0.331649	0.335019	0.179872	VEGFA	1
GO:0048285	organelle fission	1/16	476/18866	0.335708	0.338627	0.18181	KDR	1
GO:0008544	epidermis development	1/16	477/18866	0.336286	0.33872	0.181859	HRNR	1
GO:0016569	covalent chromatin modification	1/16	481/18866	0.338593	0.340551	0.182842	VEGFA	1
GO:0007409	axonogenesis	1/16	482/18866	0.339169	0.340637	0.182889	VEGFA	1
GO:0051051	negative regulation of transport	1/16	483/18866	0.339744	0.340723	0.182935	APOC1	1
GO:0050769	positive regulation of neurogenesis	1/16	485/18866	0.340893	0.341383	0.18329	VEGFA	1
GO:0016049	cell growth	1/16	490/18866	0.343757	0.343757	0.184564	VEGFA	1
ID	Description	GeneRatio	BgRatio	pvalue	p.adjust	qvalue	geneID	Count
GO:0072562	blood microparticle	5/16	148/19559	9.46783e-08	4.44988e-06	2.09289e-06	IGHG1/IGHV3-13/HPX/HBB/CFHR1	5
GO:0042571	immunoglobulin complex, circulating	3/16	76/19559	3.04444e-05	0.000715442	0.00033649	IGHG1/IGHV3-35/IGHV3-13	3
GO:0071682	endocytic vesicle lumen	2/16	20/19559	0.000118185	0.00185157	0.000870838	HPX/HBB	2
GO:0019814	immunoglobulin complex	3/16	163/19559	0.000293813	0.00311112	0.00146324	IGHG1/IGHV3-35/IGHV3-13	3
GO:0062023	collagen-containing extracellular matrix	4/16	427/19559	0.00033097	0.00311112	0.00146324	F9/HPX/DPT/HRNR	4
GO:0009897	external side of plasma membrane	3/16	417/19559	0.00438233	0.0343282	0.0161454	IGHG1/IGHV3-35/IGHV3-13	3
GO:0005766	primary lysosome	2/16	155/19559	0.00696141	0.0405389	0.0190665	PRCP/HRNR	2
GO:0042582	azurophil granule	2/16	155/19559	0.00696141	0.0405389	0.0190665	PRCP/HRNR	2
GO:0070820	tertiary granule	2/16	164/19559	0.00776277	0.0405389	0.0190665	PRCP/HBB	2
GO:0031838	haptoglobin-hemoglobin complex	1/16	11/19559	0.00896398	0.0414606	0.0194999	HBB	1
GO:0005833	hemoglobin complex	1/16	12/19559	0.00977514	0.0414606	0.0194999	HBB	1
GO:0042627	chylomicron	1/16	13/19559	0.0105857	0.0414606	0.0194999	APOC1	1
GO:0034361	very-low-density lipoprotein particle	1/16	20/19559	0.0162421	0.0545269	0.0256454	APOC1	1
GO:0034385	triglyceride-rich plasma lipoprotein particle	1/16	20/19559	0.0162421	0.0545269	0.0256454	APOC1	1
GO:0034364	high-density lipoprotein particle	1/16	27/19559	0.0218681	0.065033	0.0305866	APOC1	1
GO:0030139	endocytic vesicle	2/16	313/19559	0.0264218	0.065033	0.0305866	HPX/HBB	2
GO:0034774	secretory granule lumen	2/16	322/19559	0.0278466	0.065033	0.0305866	VEGFA/HRNR	2
GO:0060205	cytoplasmic vesicle lumen	2/16	326/19559	0.0284898	0.065033	0.0305866	VEGFA/HRNR	2
GO:0031983	vesicle lumen	2/16	328/19559	0.0288137	0.065033	0.0305866	VEGFA/HRNR	2
GO:0034358	plasma lipoprotein particle	1/16	36/19559	0.0290573	0.065033	0.0305866	APOC1	1
GO:1990777	lipoprotein particle	1/16	36/19559	0.0290573	0.065033	0.0305866	APOC1	1
GO:0032994	protein-lipid complex	1/16	39/19559	0.0314427	0.0671729	0.0315931	APOC1	1
GO:0001533	cornified envelope	1/16	45/19559	0.0361969	0.0739676	0.0347888	HRNR	1
GO:1904724	tertiary granule lumen	1/16	55/19559	0.0440721	0.0863078	0.0405927	HBB	1
GO:0035577	azurophil granule membrane	1/16	58/19559	0.0464228	0.0872749	0.0410476	PRCP	1
GO:0101003	ficolin-1-rich granule membrane	1/16	61/19559	0.0487682	0.0881579	0.0414628	PRCP	1
GO:0031093	platelet alpha granule lumen	1/16	67/19559	0.0534426	0.0923147	0.0434179	VEGFA	1
GO:0045178	basal part of cell	1/16	69/19559	0.054996	0.0923147	0.0434179	PRCP	1
GO:0031091	platelet alpha granule	1/16	91/19559	0.071926	0.112684	0.0529981	VEGFA	1
GO:0035578	azurophil granule lumen	1/16	91/19559	0.071926	0.112684	0.0529981	HRNR	1
GO:0005796	Golgi lumen	1/16	103/19559	0.0810403	0.122868	0.0577877	F9	1
GO:0101002	ficolin-1-rich granule	1/16	124/19559	0.0967887	0.137851	0.0648345	HBB	1
GO:1904813	ficolin-1-rich granule lumen	1/16	124/19559	0.0967887	0.137851	0.0648345	HBB	1
GO:0005912	adherens junction	1/16	166/19559	0.127529	0.176291	0.0829139	VEGFA	1
GO:0005775	vacuolar lumen	1/16	173/19559	0.132557	0.178004	0.0837199	HRNR	1
GO:0030667	secretory granule membrane	1/16	306/19559	0.223063	0.28499	0.134038	PRCP	1
GO:0005788	endoplasmic reticulum lumen	1/16	308/19559	0.224354	0.28499	0.134038	F9	1
GO:0045121	membrane raft	1/16	329/19559	0.237787	0.287328	0.135137	KDR	1
GO:0098857	membrane microdomain	1/16	330/19559	0.238421	0.287328	0.135137	KDR	1
GO:0098589	membrane region	1/16	343/19559	0.24662	0.289779	0.13629	KDR	1
GO:0005765	lysosomal membrane	1/16	375/19559	0.266453	0.292576	0.137606	PRCP	1
GO:0098852	lytic vacuole membrane	1/16	375/19559	0.266453	0.292576	0.137606	PRCP	1
GO:0005769	early endosome	1/16	377/19559	0.267676	0.292576	0.137606	KDR	1
GO:0005925	focal adhesion	1/16	415/19559	0.290555	0.30411	0.14303	FLT1	1
GO:0030055	cell-substrate junction	1/16	423/19559	0.295285	0.30411	0.14303	FLT1	1
GO:0005774	vacuolar membrane	1/16	427/19559	0.297639	0.30411	0.14303	PRCP	1
GO:0005911	cell-cell junction	1/16	493/19559	0.335434	0.335434	0.157763	VEGFA	1
ID	Description	GeneRatio	BgRatio	pvalue	p.adjust	qvalue	geneID	Count
GO:0070008	serine-type exopeptidase activity	2/16	10/18352	3.19384e-05	0.0012006	0.00049649	F11/PRCP	2
GO:0034987	immunoglobulin receptor binding	3/16	80/18352	4.28787e-05	0.0012006	0.00049649	IGHG1/IGHV3-35/IGHV3-13	3
GO:0003823	antigen binding	3/16	168/18352	0.000386573	0.00629867	0.00260471	IGHG1/IGHV3-35/IGHV3-13	3
GO:0008236	serine-type peptidase activity	3/16	187/18352	0.000528728	0.00629867	0.00260471	F9/F11/PRCP	3
GO:0017171	serine hydrolase activity	3/16	191/18352	0.000562381	0.00629867	0.00260471	F9/F11/PRCP	3
GO:0004177	aminopeptidase activity	2/16	46/18352	0.000721259	0.00673175	0.00278381	F11/PRCP	2
GO:0004714	transmembrane receptor protein tyrosine kinase activity	2/16	61/18352	0.00126559	0.0101247	0.0041869	FLT1/KDR	2
GO:0019199	transmembrane receptor protein kinase activity	2/16	80/18352	0.00216439	0.0151508	0.00626535	FLT1/KDR	2
GO:0008238	exopeptidase activity	2/16	95/18352	0.00303503	0.0188846	0.00780944	F11/PRCP	2
GO:0004713	protein tyrosine kinase activity	2/16	135/18352	0.0060247	0.0311132	0.0128664	FLT1/KDR	2
GO:0019838	growth factor binding	2/16	136/18352	0.00611152	0.0311132	0.0128664	FLT1/KDR	2
GO:0031720	haptoglobin binding	1/16	10/18352	0.00868639	0.0371764	0.0153737	HBB	1
GO:0004252	serine-type endopeptidase activity	2/16	169/18352	0.00929411	0.0371764	0.0153737	F9/F11	2
GO:0008201	heparin binding	2/16	169/18352	0.00929411	0.0371764	0.0153737	VEGFA/F11	2
GO:0004859	phospholipase inhibitor activity	1/16	13/18352	0.0112785	0.0383247	0.0158485	APOC1	1
GO:0005172	vascular endothelial growth factor receptor binding	1/16	14/18352	0.0121411	0.0383247	0.0158485	VEGFA	1
GO:0005344	oxygen carrier activity	1/16	14/18352	0.0121411	0.0383247	0.0158485	HBB	1
GO:0004089	carbonate dehydratase activity	1/16	15/18352	0.013003	0.0383247	0.0158485	CA1	1
GO:0005161	platelet-derived growth factor receptor binding	1/16	15/18352	0.013003	0.0383247	0.0158485	VEGFA	1
GO:0055102	lipase inhibitor activity	1/16	18/18352	0.0155845	0.0424071	0.0175368	APOC1	1
GO:0043177	organic acid binding	2/16	224/18352	0.0159026	0.0424071	0.0175368	APOC1/HBB	2
GO:0005539	glycosaminoglycan binding	2/16	232/18352	0.0169926	0.0432538	0.0178869	VEGFA/F11	2
GO:1901681	sulfur compound binding	2/16	262/18352	0.0213556	0.0519963	0.0215022	VEGFA/F11	2
GO:0001968	fibronectin binding	1/16	27/18352	0.0232911	0.0538375	0.0222636	VEGFA	1
GO:0031210	phosphatidylcholine binding	1/16	29/18352	0.024996	0.0538375	0.0222636	APOC1	1
GO:0050997	quaternary ammonium group binding	1/16	29/18352	0.024996	0.0538375	0.0222636	APOC1	1
GO:0019825	oxygen binding	1/16	36/18352	0.0309411	0.0635753	0.0262905	HBB	1
GO:0042056	chemoattractant activity	1/16	37/18352	0.0317876	0.0635753	0.0262905	VEGFA	1
GO:0005504	fatty acid binding	1/16	39/18352	0.0334786	0.0646484	0.0267343	APOC1	1
GO:0051879	Hsp90 protein binding	1/16	42/18352	0.0360099	0.0665718	0.0275297	KDR	1
GO:0004180	carboxypeptidase activity	1/16	43/18352	0.0368523	0.0665718	0.0275297	PRCP	1
GO:0004601	peroxidase activity	1/16	52/18352	0.0444026	0.0777046	0.0321335	HBB	1
GO:0016684	oxidoreductase activity, acting on peroxide as acceptor	1/16	56/18352	0.0477405	0.080003	0.0330839	HBB	1
GO:0050840	extracellular matrix binding	1/16	57/18352	0.0485732	0.080003	0.0330839	VEGFA	1
GO:0016836	hydro-lyase activity	1/16	59/18352	0.0502367	0.0803787	0.0332393	CA1	1
GO:0004175	endopeptidase activity	2/16	440/18352	0.0551453	0.0857815	0.0354736	F9/F11	2
GO:0033293	monocarboxylic acid binding	1/16	72/18352	0.060983	0.0922911	0.0381655	APOC1	1
GO:0016835	carbon-oxygen lyase activity	1/16	74/18352	0.0626261	0.0922911	0.0381655	CA1	1
GO:0016209	antioxidant activity	1/16	86/18352	0.0724284	0.104	0.0430074	HBB	1
GO:0031072	heat shock protein binding	1/16	127/18352	0.105199	0.147279	0.0609048	KDR	1
GO:0020037	heme binding	1/16	138/18352	0.113805	0.150775	0.0623506	HBB	1
GO:0070851	growth factor receptor binding	1/16	141/18352	0.116138	0.150775	0.0623506	VEGFA	1
GO:0052689	carboxylic ester hydrolase activity	1/16	143/18352	0.117691	0.150775	0.0623506	CA1	1
GO:0005178	integrin binding	1/16	144/18352	0.118466	0.150775	0.0623506	KDR	1
GO:0046906	tetrapyrrole binding	1/16	148/18352	0.121561	0.151276	0.0625576	HBB	1
GO:0008083	growth factor activity	1/16	162/18352	0.132312	0.161076	0.0666103	VEGFA	1
GO:0005201	extracellular matrix structural constituent	1/16	169/18352	0.137642	0.163998	0.0678189	DPT	1
GO:0016829	lyase activity	1/16	189/18352	0.1527	0.17815	0.0736709	CA1	1
GO:0031406	carboxylic acid binding	1/16	212/18352	0.169712	0.193956	0.0802075	APOC1	1
GO:0005125	cytokine activity	1/16	235/18352	0.186403	0.208771	0.0863341	VEGFA	1
GO:0005126	cytokine receptor binding	1/16	271/18352	0.211899	0.232673	0.0962181	VEGFA	1
GO:0045296	cadherin binding	1/16	332/18352	0.253397	0.272889	0.112849	KDR	1
GO:0004857	enzyme inhibitor activity	1/16	383/18352	0.286511	0.302728	0.125188	APOC1	1
GO:0005543	phospholipid binding	1/16	454/18352	0.330323	0.342557	0.141659	APOC1	1
GO:0048018	receptor ligand activity	1/16	487/18352	0.349816	0.352722	0.145863	VEGFA	1
GO:0030546	signaling receptor activator activity	1/16	492/18352	0.352722	0.352722	0.145863	VEGFA	1
